# Supplementary material for: Temporality of body mass index, blood tests, comorbidities and medication use as early markers for pancreatic ductal adenocarcinoma (PDAC): a nested case–control study
Source: PubMed Central journal article supplement (PMC9933161; doi:10.1136/gutjnl-2021-326522), 2022-06-27
Supplement: gutjnl-2021-326522supp001.pdf [file gutjnl-2021-326522supp001.pdf]

## Supplement

Table S1: Completeness of biomarker values used in five-year time trend analysis for each observation time period reported in number of observations (n) and percent (%) of total cohort (n=289,356)

| Months prior to index month | BMI    | %     | HbA1c  | %    | ALT    | %     | AST   | %    | GGT    | %    | Bilirubin | %     | Hb     | %     | WBC    | %     | Platelet | %     |
|-----------------------------|--------|-------|--------|------|--------|-------|-------|------|--------|------|-----------|-------|--------|-------|--------|-------|----------|-------|
| 0 to <3                     | 36,370 | 12.57 | 25,873 | 8.94 | 50,519 | 17.46 | 9,505 | 3.28 | 17,719 | 6.12 | 55,465    | 19.17 | 55,435 | 19.16 | 55,335 | 19.12 | 55,280   | 19.10 |
| 3 to <6                     | 34,966 | 12.08 | 24,253 | 8.38 | 41,931 | 14.49 | 7,826 | 2.70 | 13,695 | 4.73 | 45,927    | 15.87 | 45,615 | 15.76 | 45,485 | 15.72 | 45,434   | 15.70 |
| 6 to <9                     | 34,395 | 11.89 | 23,353 | 8.07 | 39,575 | 13.68 | 7,245 | 2.50 | 13,079 | 4.52 | 43,398    | 15.00 | 42,471 | 14.68 | 42,376 | 14.64 | 42,303   | 14.62 |
| 9 to <12                    | 33,805 | 11.68 | 22,174 | 7.66 | 38,202 | 13.20 | 7,186 | 2.48 | 12,556 | 4.34 | 42,150    | 14.57 | 41,314 | 14.28 | 41,214 | 14.24 | 41,155   | 14.22 |
| 12 to <15                   | 33,021 | 11.41 | 21,546 | 7.45 | 37,010 | 12.79 | 7,101 | 2.45 | 12,500 | 4.32 | 40,960    | 14.16 | 39,801 | 13.76 | 39,728 | 13.73 | 39,694   | 13.72 |
| 15 to <18                   | 32,495 | 11.23 | 20,645 | 7.13 | 36,097 | 12.47 | 6,889 | 2.38 | 12,276 | 4.24 | 39,915    | 13.79 | 38,873 | 13.43 | 38,793 | 13.41 | 38,749   | 13.39 |
| 18 to <21                   | 32,273 | 11.15 | 19,803 | 6.84 | 35,052 | 12.11 | 6,675 | 2.31 | 11,989 | 4.14 | 38,745    | 13.39 | 37,420 | 12.93 | 37,336 | 12.90 | 37,353   | 12.91 |
| 21 to <24                   | 31,637 | 10.93 | 19,070 | 6.59 | 34,071 | 11.77 | 6,594 | 2.28 | 11,726 | 4.05 | 37,787    | 13.06 | 36,462 | 12.60 | 36,423 | 12.59 | 36,393   | 12.58 |
| 24 to <27                   | 31,147 | 10.76 | 18,409 | 6.36 | 33,278 | 11.50 | 6,555 | 2.27 | 11,588 | 4.00 | 37,000    | 12.79 | 35,670 | 12.33 | 35,622 | 12.31 | 35,625   | 12.31 |
| 27 to <30                   | 30,473 | 10.53 | 17,368 | 6.00 | 32,031 | 11.07 | 6,502 | 2.25 | 11,188 | 3.87 | 35,784    | 12.37 | 34,470 | 11.91 | 34,425 | 11.90 | 34,397   | 11.89 |
| 30 to <33                   | 30,160 | 10.42 | 16,930 | 5.85 | 31,451 | 10.87 | 6,315 | 2.18 | 11,042 | 3.82 | 35,077    | 12.12 | 33,704 | 11.65 | 33,644 | 11.63 | 33,634   | 11.62 |
| 33 to <36                   | 29,496 | 10.19 | 16,066 | 5.55 | 30,749 | 10.63 | 6,260 | 2.16 | 10,966 | 3.79 | 34,450    | 11.91 | 32,938 | 11.38 | 32,860 | 11.36 | 32,854   | 11.35 |
| 36 to <39                   | 29,364 | 10.15 | 15,661 | 5.41 | 29,699 | 10.26 | 6,165 | 2.13 | 10,605 | 3.67 | 33,263    | 11.50 | 31,797 | 10.99 | 31,772 | 10.98 | 31,757   | 10.98 |
| 39 to <42                   | 28,657 | 9.90  | 14,783 | 5.11 | 28,873 | 9.98  | 6,074 | 2.10 | 10,487 | 3.62 | 32,491    | 11.23 | 30,981 | 10.71 | 30,964 | 10.70 | 30,936   | 10.69 |
| 42 to <45                   | 28,231 | 9.76  | 14,127 | 4.88 | 28,025 | 9.69  | 6,030 | 2.08 | 10,127 | 3.50 | 31,643    | 10.94 | 29,897 | 10.33 | 29,867 | 10.32 | 29,821   | 10.31 |
| 45 to <48                   | 27,595 | 9.54  | 13,563 | 4.69 | 27,298 | 9.43  | 5,770 | 1.99 | 10,004 | 3.46 | 30,807    | 10.65 | 29,302 | 10.13 | 29,274 | 10.12 | 29,259   | 10.11 |
| 48 to <51                   | 27,292 | 9.43  | 12,998 | 4.49 | 26,614 | 9.20  | 5,788 | 2.00 | 9,824  | 3.40 | 30,220    | 10.44 | 28,211 | 9.75  | 28,206 | 9.75  | 28,213   | 9.75  |
| 51 to <54                   | 26,758 | 9.25  | 12,471 | 4.31 | 25,687 | 8.88  | 5,641 | 1.95 | 9,705  | 3.35 | 29,216    | 10.10 | 27,480 | 9.50  | 27,477 | 9.50  | 27,464   | 9.49  |
| 54 to <57                   | 26,721 | 9.23  | 11,983 | 4.14 | 24,709 | 8.54  | 5,566 | 1.92 | 9,182  | 3.17 | 28,161    | 9.73  | 26,626 | 9.20  | 26,573 | 9.18  | 26,549   | 9.18  |
| 57 to <60                   | 25,937 | 8.96  | 11,068 | 3.83 | 23,988 | 8.29  | 5,450 | 1.88 | 9,129  | 3.15 | 27,462    | 9.49  | 25,716 | 8.89  | 25,666 | 8.87  | 25,666   | 8.87  |

Table S2: Onset of comorbidities and initiation time of medication in PDAC cases versus controls

|                              | Onset/initiation time | PDAC cases   | Controls       |
|------------------------------|-----------------------|--------------|----------------|
| Total, N                     |                       | 28137        | 261219         |
| <b>Comorbidities</b>         |                       |              |                |
| Type 2 diabetes              | None                  | 21212 (75.4) | 228257 (87.4)  |
|                              | Start ≤3 years ago    | 2731 (9.7)   | 6497 (2.5)     |
|                              | Start >3 years ago    | 4194 (14.9)  | 26465 (10.1)   |
| Prediabetes                  | None                  | 26465 (94.1) | 250052 (95.7)  |
|                              | Start ≤3 years ago    | 808 (2.9)    | 4840 (1.9)     |
|                              | Start >3 years ago    | 864 (3.1)    | 6327 (2.4)     |
| Acute pancreatitis           | None                  | 27400 (97.4) | 259651 (99.4)  |
|                              | Start ≤3 years ago    | 446 (1.6)    | 328 (0.1)      |
|                              | Start >3 years ago    | 291 (1.0)    | 1240 (0.5)     |
| Chronic pancreatitis         | None                  | 27816 (98.9) | 260863 (99.9)  |
|                              | Start ≤3 years ago    | 208 (0.7)    | 82 (0.0)       |
|                              | Start >3 years ago    | 113 (0.4)    | 274 (0.1)      |
| Hypercholesterolaemia        | None                  | 23226 (82.5) | 216040 (82.7)  |
|                              | Start ≤3 years ago    | 705 (2.5)    | 7621 (2.9)     |
|                              | Start >3 years ago    | 4206 (14.9)  | 37558 (14.4)   |
| Venous thromboembolism       | None                  | 26491 (94.2) | 252161 (96.5)  |
|                              | Start ≤3 years ago    | 693 (2.5)    | 2032 (0.8)     |
|                              | Start >3 years ago    | 953 (3.4)    | 7026 (2.7)     |
| Asthma                       | None                  | 25147 (89.4) | 234560 (89.8)  |
|                              | Start ≤3 years ago    | 284 (1.0)    | 2597 (1.0)     |
|                              | Start >3 years ago    | 2706 (9.6)   | 24062 (9.2)    |
| Inflammatory bowel disease   | None                  | 27800 (98.8) | 258510 (99.0)  |
|                              | Start ≤3 years ago    | 47 (0.2)     | 262 (0.1)      |
|                              | Start >3 years ago    | 290 (1.0)    | 2447 (0.9)     |
| Celiac disease               | None                  | 27994 (99.5) | 260362 (99.7)  |
|                              | Start ≤3 years ago    | 41 (0.1)     | 160 (0.1)      |
|                              | Start >3 years ago    | 102 (0.4)    | 697 (0.3)      |
| Breast cancer                | None                  | 27366 (97.3) | 255262 (97.7)  |
|                              | Start ≤3 years ago    | 129 (0.5)    | 1095 (0.4)     |
|                              | Start >3 years ago    | 642 (2.3)    | 4862 (1.9)     |
| Ovarian cancer               | None                  | 28055 (99.7) | 260808 (99.8)  |
|                              | Start ≤3 years ago    | 21 (0.1)     | 90 (0.0)       |
|                              | Start >3 years ago    | 61 (0.2)     | 321 (0.1)      |
| Prostate cancer              | None                  | 27459 (97.6) | 255989 (98.0)  |
|                              | Start ≤3 years ago    | 235 (0.8)    | 1662 (0.6)     |
|                              | Start >3 years ago    | 443 (1.6)    | 3568 (1.4)     |
| Pancreatic cyst              | None                  | 27945 (99.3) | 261104 (100.0) |
|                              | Start ≤3 years ago    | 150 (0.5)    | 64 (0.0)       |
|                              | Start >3 years ago    | 42 (0.1)     | 51 (0.0)       |
| Rheumatoid arthritis         | None                  | 27597 (98.1) | 256509 (98.2)  |
|                              | Start ≤3 years ago    | 87 (0.3)     | 789 (0.3)      |
|                              | Start >3 years ago    | 453 (1.6)    | 3921 (1.5)     |
| Systemic lupus erythematosus | None                  | 28113 (99.9) | 260981 (99.9)  |
|                              | Start ≤3 years ago    | <5           | 23 (0.0)       |



|                                                       |                    |              |                |
|-------------------------------------------------------|--------------------|--------------|----------------|
|                                                       | Start >3 years ago | 22 (0.1)     | 215 (0.1)      |
| Multiple sclerosis                                    | None               | 28065 (99.7) | 260585 (99.8)  |
|                                                       | Start ≤3 years ago | <5           | 38 (0.0)       |
|                                                       | Start >3 years ago | 68 (0.2)     | 596 (0.2)      |
| AIDS/HIV                                              | None               | 28113 (99.9) | 261096 (100.0) |
|                                                       | Start ≤3 years ago | <5           | 20 (0.0)       |
|                                                       | Start >3 years ago | 22 (0.1)     | 103 (0.0)      |
| Psoriatic arthritis                                   | None               | 28062 (99.7) | 260500 (99.7)  |
|                                                       | Start ≤3 years ago | 9 (0.0)      | 103 (0.0)      |
|                                                       | Start >3 years ago | 66 (0.2)     | 616 (0.2)      |
| <b>Medications</b>                                    |                    |              |                |
| Insulin                                               | None               | 26153 (92.9) | 255242 (97.7)  |
|                                                       | Start ≤3 years ago | 1180 (4.2)   | 1855 (0.7)     |
|                                                       | Start >3 years ago | 804 (2.9)    | 4122 (1.6)     |
| Sulphonylurea                                         | None               | 24332 (86.5) | 245691 (94.1)  |
|                                                       | Start ≤3 years ago | 1725 (6.1)   | 3666 (1.4)     |
|                                                       | Start >3 years ago | 2080 (7.4)   | 11862 (4.5)    |
| Biguanides                                            | None               | 22994 (81.7) | 237137 (90.8)  |
|                                                       | Start ≤3 years ago | 2275 (8.1)   | 6578 (2.5)     |
|                                                       | Start >3 years ago | 2868 (10.2)  | 17504 (6.7)    |
| Alpha-glucosidase inhibitor                           | None               | 27979 (99.4) | 260369 (99.7)  |
|                                                       | Start ≤3 years ago | 31 (0.1)     | 130 (0.0)      |
|                                                       | Start >3 years ago | 127 (0.5)    | 720 (0.3)      |
| Meglitinide                                           | None               | 28016 (99.6) | 260695 (99.8)  |
|                                                       | Start ≤3 years ago | 41 (0.1)     | 133 (0.1)      |
|                                                       | Start >3 years ago | 80 (0.3)     | 391 (0.1)      |
| Dipeptidyl-peptidase 4 inhibitor                      | None               | 27109 (96.3) | 257215 (98.5)  |
|                                                       | Start ≤3 years ago | 646 (2.3)    | 2110 (0.8)     |
|                                                       | Start >3 years ago | 382 (1.4)    | 1894 (0.7)     |
| Thiazolidinedione                                     | None               | 27185 (96.6) | 256668 (98.3)  |
|                                                       | Start ≤3 years ago | 321 (1.1)    | 1123 (0.4)     |
|                                                       | Start >3 years ago | 631 (2.2)    | 3428 (1.3)     |
| Glucagon-like peptide-1                               | None               | 27976 (99.4) | 260437 (99.7)  |
|                                                       | Start ≤3 years ago | 67 (0.2)     | 334 (0.1)      |
|                                                       | Start >3 years ago | 94 (0.3)     | 448 (0.2)      |
| Sodium-glucose transport protein 2 (SGLT2) inhibitors | None               | 27937 (99.3) | 260501 (99.7)  |
|                                                       | Start ≤3 years ago | 161 (0.6)    | 544 (0.2)      |
|                                                       | Start >3 years ago | 39 (0.1)     | 174 (0.1)      |
| Proton pump inhibitor                                 | None               | 10770 (38.3) | 151382 (58.0)  |
|                                                       | Start ≤3 years ago | 8115 (28.8)  | 29802 (11.4)   |
|                                                       | Start >3 years ago | 9252 (32.9)  | 80035 (30.6)   |
| Histamine-2 receptor blocker                          | None               | 21611 (76.8) | 216045 (82.7)  |
|                                                       | Start ≤3 years ago | 1937 (6.9)   | 6649 (2.5)     |
|                                                       | Start >3 years ago | 4589 (16.3)  | 38525 (14.7)   |
| Aspirin                                               | None               | 17152 (61.0) | 171569 (65.7)  |
|                                                       | Start ≤3 years ago | 2545 (9.0)   | 20481 (7.8)    |
|                                                       | Start >3 years ago | 8440 (30.0)  | 69169 (26.5)   |

|                   |                     |              |               |
|-------------------|---------------------|--------------|---------------|
| Statin            | None                | 16197 (57.6) | 161055 (61.7) |
|                   | Start <=3 years ago | 3163 (11.2)  | 26408 (10.1)  |
|                   | Start >3 years ago  | 8777 (31.2)  | 73756 (28.2)  |
| Bisphosphonate    | None                | 25495 (90.6) | 238774 (91.4) |
|                   | Start <=3 years ago | 946 (3.4)    | 8064 (3.1)    |
|                   | Start >3 years ago  | 1696 (6.0)   | 14381 (5.5)   |
| Immunosuppressant | None                | 27907 (99.2) | 259622 (99.4) |
|                   | Start <=3 years ago | 67 (0.2)     | 400 (0.2)     |
|                   | Start >3 years ago  | 163 (0.6)    | 1197 (0.5)    |
| Digoxin           | None                | 26696 (94.9) | 250904 (96.1) |
|                   | Start <=3 years ago | 509 (1.8)    | 3466 (1.3)    |
|                   | Start >3 years ago  | 932 (3.3)    | 6849 (2.6)    |

## Sex-specific population

|                         | Onset/initiation time | PDAC cases   | Controls      |
|-------------------------|-----------------------|--------------|---------------|
| Breast cancer (female)  | None                  | 13335 (94.5) | 125386 (95.5) |
|                         | Start <=3 years ago   | 129 (0.9)    | 1094 (0.8)    |
|                         | Start >3 years ago    | 642 (4.6)    | 4858 (3.7)    |
| Ovarian cancer (female) | None                  | 14024 (99.4) | 130929 (99.7) |
|                         | Start <=3 years ago   | 21 (0.1)     | 90 (0.1)      |
|                         | Start >3 years ago    | 61 (0.4)     | 319 (0.2)     |
| Prostate cancer (male)  | None                  | 13353 (95.2) | 124652 (96.0) |
|                         | Start <=3 years ago   | 235 (1.7)    | 1661 (1.3)    |
|                         | Start >3 years ago    | 443 (3.2)    | 3568 (2.7)    |

Table S3: E-values – sensitivity analysis for potential unmeasured confounding of statistically significant risk factors (large E-values imply a relatively large unmeasured confounding effect is needed to explain away residual confounding, whilst small E-values<sup>39,40</sup> imply small unmeasured confounding effect is needed to explain away any residual confounding)

|                              | OR (95% CI)         | E-value (point estimate) | E-value (lower CI to span 1) |
|------------------------------|---------------------|--------------------------|------------------------------|
| <b>Comorbidities</b>         |                     |                          |                              |
| <b>Recent-onset</b>          |                     |                          |                              |
| Pancreatic cyst              | 19.60 (14.36-26.76) | 38.69                    | 28.21                        |
| Chronic pancreatitis         | 11.93 (9.03-15.77)  | 23.35                    | 17.55                        |
| Acute pancreatitis           | 10.94 (9.39-12.76)  | 21.37                    | 18.27                        |
| Type 2 diabetes              | 4.93 (4.69-5.18)    | 9.33                     | 8.85                         |
| Venous thromboembolism       | 3.19 (2.91-3.49)    | 5.83                     | 5.27                         |
| Coeliac disease              | 2.35 (1.64-3.36)    | 4.13                     | 2.66                         |
| Ovarian cancer               | 2.18 (1.34-3.56)    | 3.78                     | 2.01                         |
| Prediabetes                  | 1.63 (1.50-1.77)    | 2.64                     | 2.37                         |
| Inflammatory bowel disease   | 1.44 (1.04-2.00)    | 2.24                     | 1.24                         |
| Prostate cancer              | 1.35 (1.17-1.55)    | 2.04                     | 1.62                         |
| Hypercholesterolemia         | 0.83 (0.77-0.91)    | 1.70                     | 1.43                         |
| <b>Long-standing</b>         |                     |                          |                              |
| Pancreatic cyst              | 6.65 (4.33-10.23)   | 12.78                    | 8.13                         |
| Chronic pancreatitis         | 2.01 (1.58-2.57)    | 3.43                     | 2.54                         |
| AIDS/HIV                     | 2.00 (1.24-3.22)    | 3.41                     | 1.79                         |
| Ovarian cancer               | 1.94 (1.46-2.57)    | 3.29                     | 2.28                         |
| Type 2 diabetes              | 1.89 (1.82-1.97)    | 3.19                     | 3.04                         |
| Acute pancreatitis           | 1.57 (1.37-1.82)    | 2.52                     | 2.08                         |
| Coeliac disease              | 1.32 (1.06-1.64)    | 1.97                     | 1.31                         |
| Breast cancer                | 1.26 (1.15-1.37)    | 1.83                     | 1.57                         |
| Venous thromboembolism       | 1.24 (1.16-1.34)    | 1.79                     | 1.59                         |
| Prostate cancer              | 1.13 (1.02-1.25)    | 1.51                     | 1.16                         |
| <b>Medications</b>           |                     |                          |                              |
| <b>Recent-initiation</b>     |                     |                          |                              |
| Insulin                      | 3.66 (3.34-4.02)    | 6.78                     | 6.14                         |
| Proton pump inhibitor        | 3.65 (3.52-3.77)    | 6.76                     | 6.50                         |
| Sulphonylurea                | 2.28 (2.11-2.47)    | 3.99                     | 3.64                         |
| Histamine-2 receptor blocker | 2.18 (2.06-2.31)    | 3.78                     | 3.54                         |
| SGLT-2 inhibitor             | 1.51 (1.22-1.85)    | 2.39                     | 1.74                         |
| Metformin                    | 1.49 (1.38-1.60)    | 2.34                     | 2.10                         |
| DPP-4 inhibitor              | 1.45 (1.30-1.62)    | 2.26                     | 1.92                         |
| Thiazolidinedione            | 1.27 (1.09-1.47)    | 1.86                     | 1.40                         |
| Meglitinide                  | 1.03 (0.69-1.54)    | 1.21                     | 1.00                         |
| Aspirin                      | 0.87 (0.83-0.92)    | 1.56                     | 1.39                         |
| Statin                       | 0.80 (0.76-0.84)    | 1.81                     | 1.67                         |
| Bisphosphonate               | 0.78 (0.72-0.84)    | 1.88                     | 1.67                         |
| <b>Long-standing</b>         |                     |                          |                              |
| Insulin                      | 1.71 (1.56-1.88)    | 2.81                     | 2.49                         |
| Proton pump inhibitor        | 1.62 (1.56-1.68)    | 2.62                     | 2.49                         |
| SGLT-2 inhibitor             | 1.21 (0.82-1.79)    | 1.71                     | 1.00                         |
| Metformin                    | 1.19 (1.10-1.30)    | 1.67                     | 1.43                         |
| Sulphonylurea                | 1.17 (1.08-1.27)    | 1.62                     | 1.37                         |

Table S4: Risk factors that remained significant after Bonferroni correction and corresponding p-values

## Comorbidities

Bonferroni corrected p-value:  $0.05/(18*2)$  tests = 0.0014

|                       | p        |
|-----------------------|----------|
| Recent-onset          |          |
| Type-2 diabetes       | <0.00001 |
| Acute pancreatitis    | <0.00001 |
| VTE                   | <0.00001 |
| Pancreatic cyst       | <0.00001 |
| Chronic pancreatitis  | <0.00001 |
| Pre-diabetes          | <0.00001 |
| Coeliac disease       | <0.00001 |
| Hypercholesterolaemia | 0.000016 |
| Prostate cancer       | 0.000050 |
|                       |          |
| Long-standing         |          |
| Type-2 diabetes       | <0.00001 |
| Pancreatic cyst       | <0.00001 |
| Acute pancreatitis    | <0.00001 |
| VTE                   | <0.00001 |
| Chronic pancreatitis  | <0.00001 |
| Breast cancer         | <0.00001 |
| Ovarian cancer        | <0.00001 |

## Medications

Bonferroni correction:  $0.05/(16*2)$  tests = 0.0016

|                       | p        |
|-----------------------|----------|
| Recent initiation     |          |
| Proton-pump inhibitor | <0.00001 |
| Insulin               | <0.00001 |
| Histamine-2 blocker   | <0.00001 |
| Sulphonylurea         | <0.00001 |
| Biguanide (metformin) | <0.00001 |
| Statin                | <0.00001 |
| DPP4-inhibitor        | <0.00001 |
| Bisphosphonate        | <0.00001 |
| Aspirin               | <0.00001 |
| SGLT-2 inhibitor      | 0.000109 |
|                       |          |
| Long-standing         |          |
| Biguanide (metformin) | 0.000046 |
| Proton-pump inhibitor | <0.00001 |
| Insulin               | <0.00001 |
| Sulphonylurea         | 0.000149 |

## List S1: ICD-10 codes and ICD-O codes used for PDAC cases

## ICD-10 codes:

C250  
C251  
C252  
C253  
C257  
C258  
C259

## ICD-O histology codes:

8000  
8001  
8003  
8010  
8020  
8021  
8022  
8031  
8140  
8141  
8210  
8211  
8230  
8310  
8430  
8440  
8450  
8452  
8470  
8480  
8481  
8490  
8500  
8503  
8550  
8551  
8560  
8570

List S2: Medical conditions and medications included as exposure variables in association analyses with risk of PDAC

a. Medical conditions (18)<sup>7,8,19-22</sup>: pancreatic cyst, chronic pancreatitis, acute pancreatitis, type-2 diabetes mellitus (T2D), prediabetes, venous thromboembolism (VTE), hypercholesterolemia breast cancer, ovarian cancer, prostate cancer, asthma, autoimmune conditions (coeliac disease, inflammatory bowel disease (IBD), rheumatoid arthritis, AIDS/HIV, multiple sclerosis, psoriatic arthritis, and systemic lupus erythematosus (SLE))

b. Medications (16)<sup>23-32</sup>: insulin, metformin, sulphonylurea, SGLT2-inhibitor, DPP4-inhibitor, GLP-1 agonist, thiazolidinedione, meglitinide, alpha-glucosidase inhibitor, proton-pump inhibitor (PPI), histamine-2-receptor antagonist (H2RA), immunosuppressant, digoxin, aspirin, statin, and bisphosphonate.

Figure S1: Directed acyclic graphs (DAGs) for exposures (i) comorbidities and (ii) medications.

## (i) Comorbidities

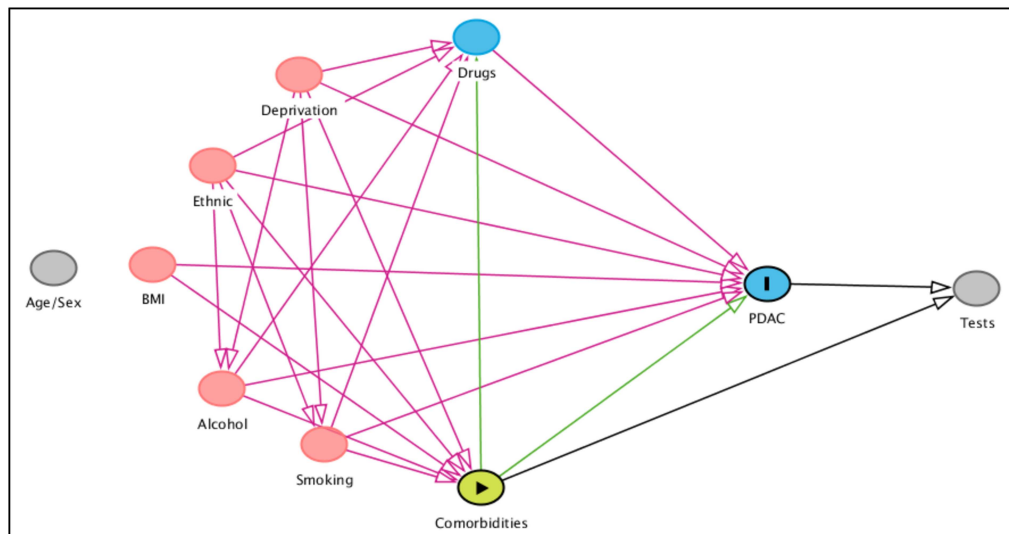

## (ii) Medications

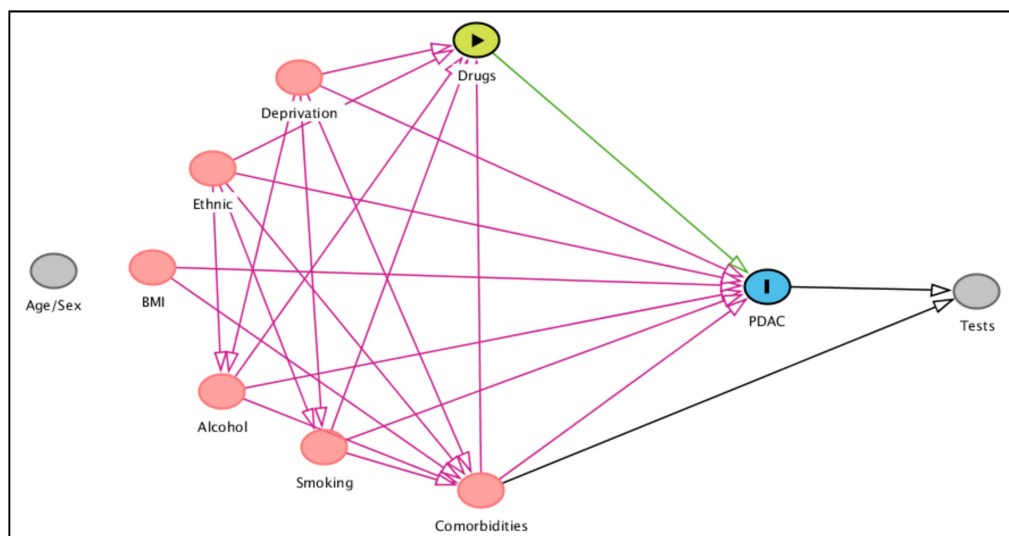

Figure S2 (a): Fractional polynomial plots for the association of BMI and biomarker levels with risk of PDAC up to 3 years versus 1 year prior to index date for other liver function markers (ALT, AST, GGT)

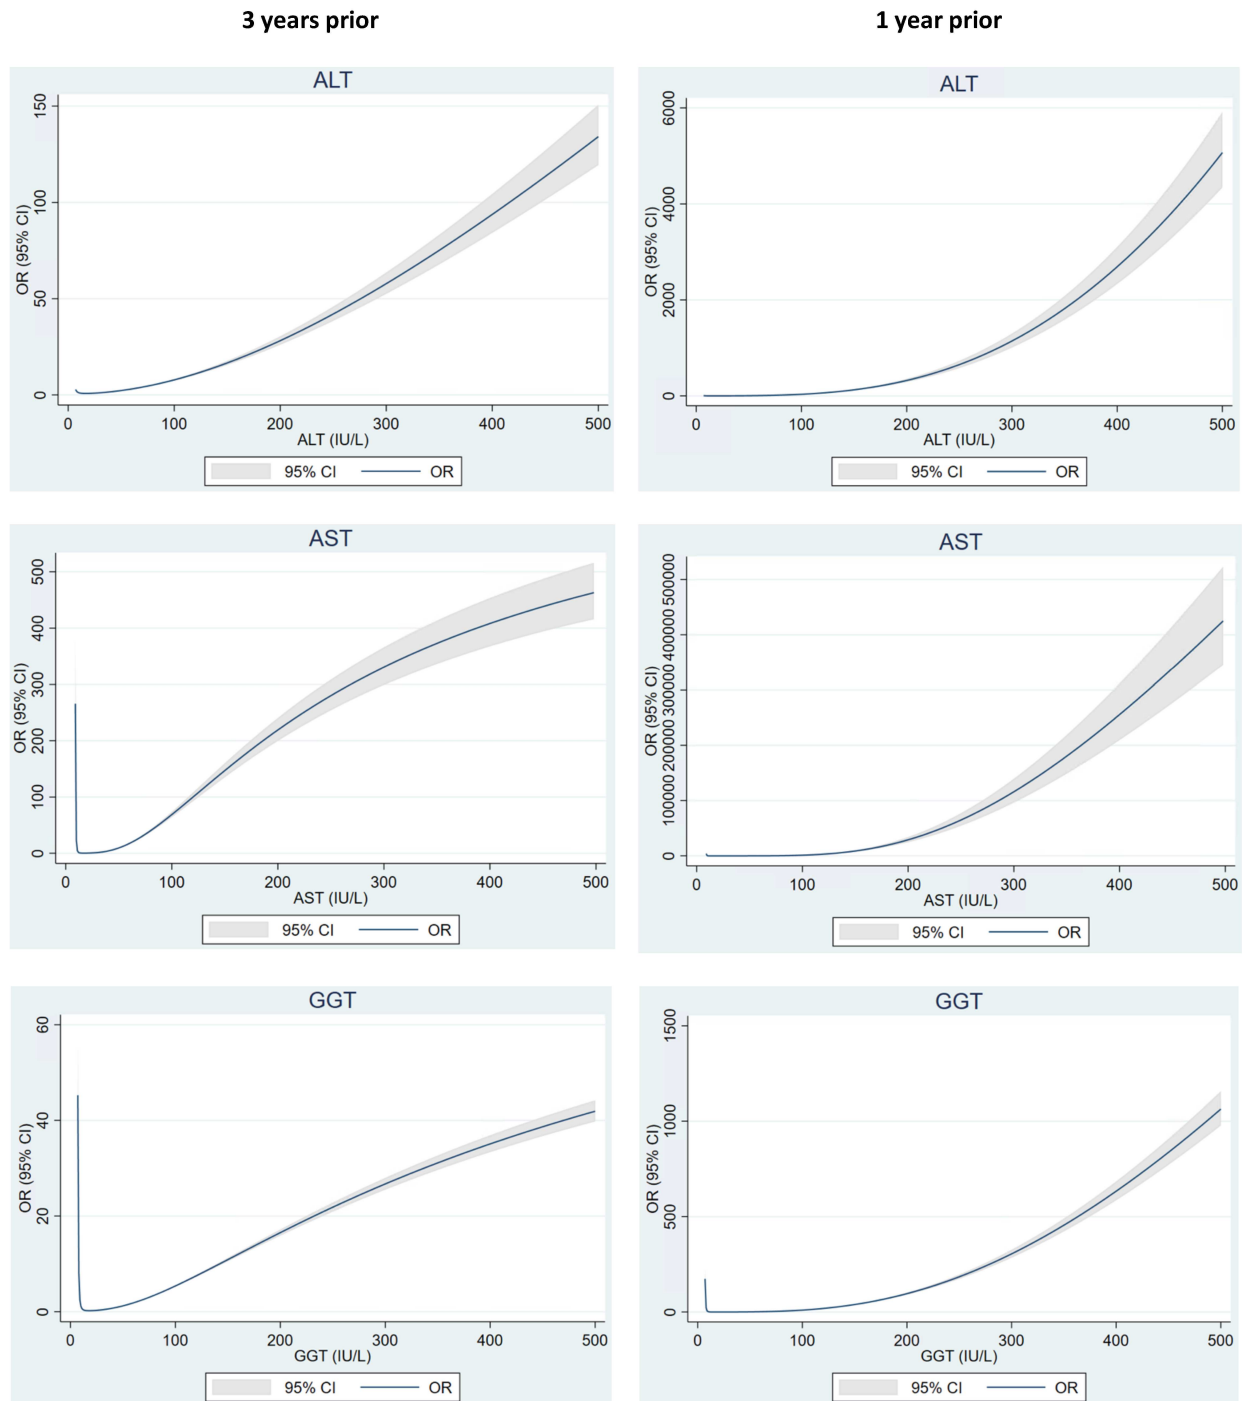



Figure S2 (b): Five year time-trends of mean liver function markers (ALT, AST, GGT) prior to index month in PDAC cases versus controls by type-2 diabetes status (recent-onset, long-standing, none) (imputed dataset)

ALT (case)

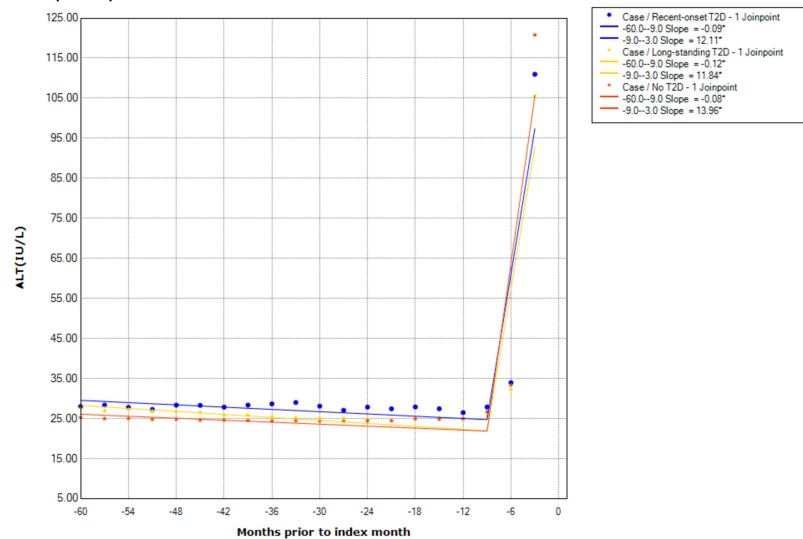

ALT (control)

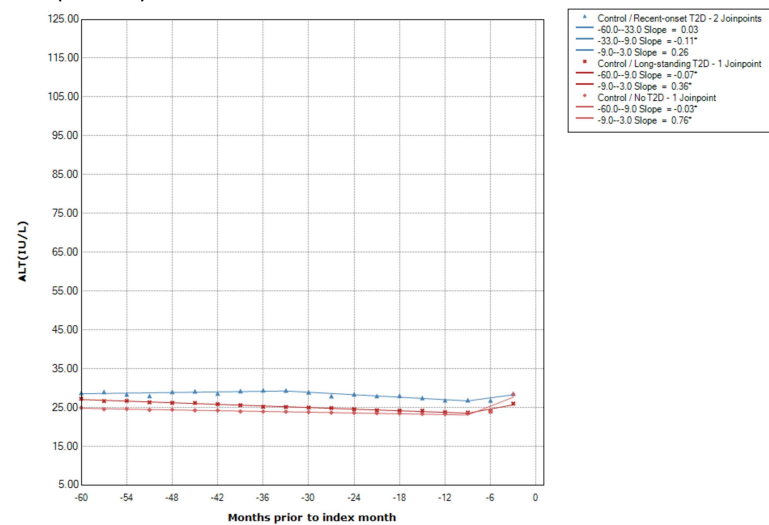

AST (case)

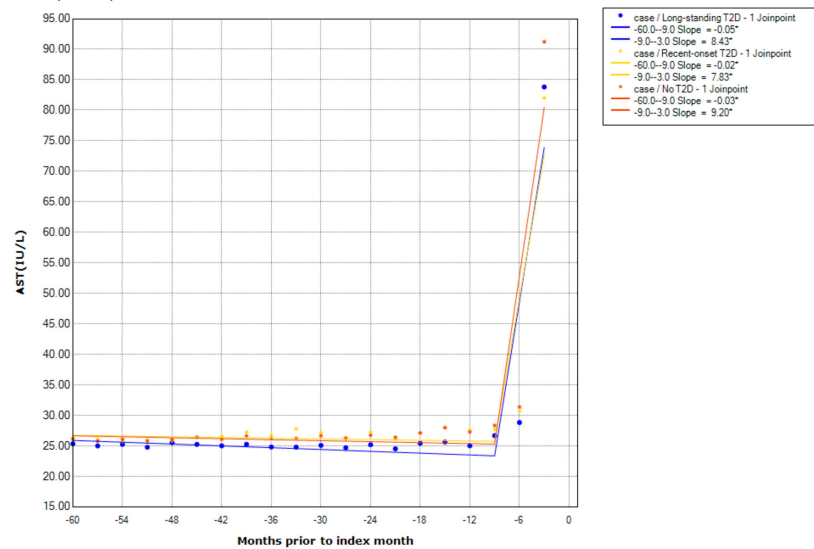

AST (control)

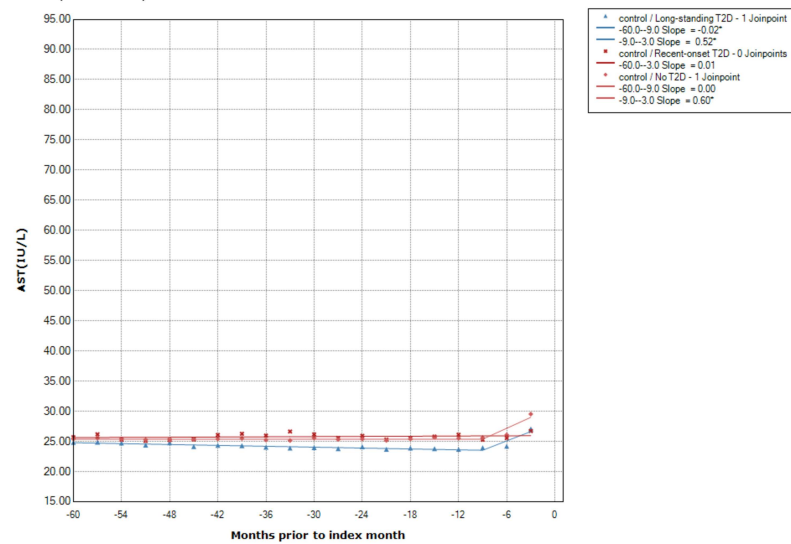

GGT (case)

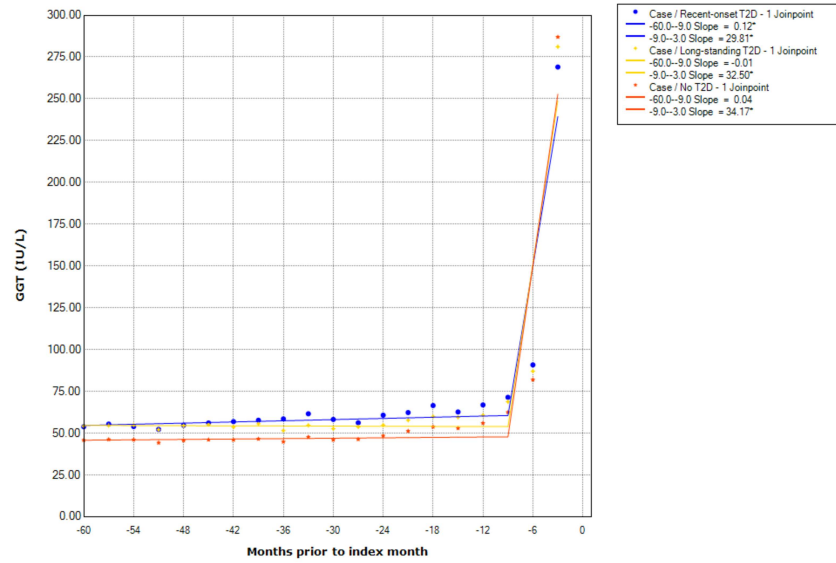

GGT (control)

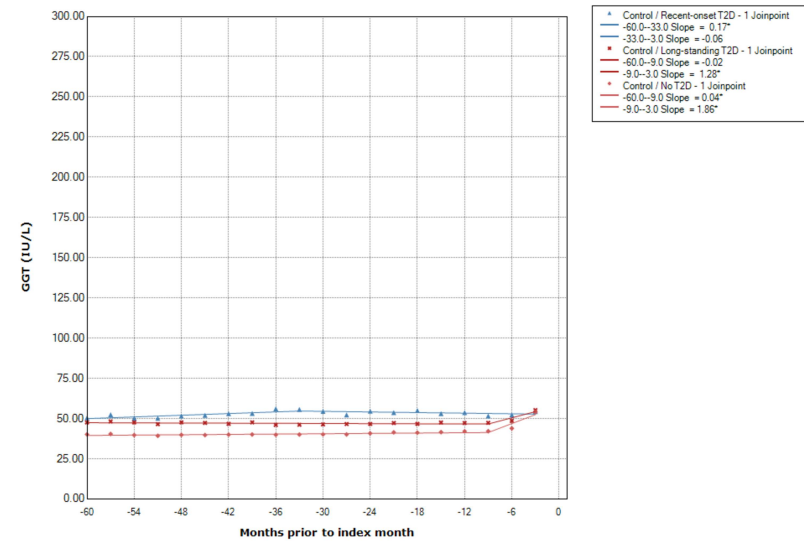

Figure S3: Five year time-trends of mean BMI and blood markers prior to index month in PDAC cases versus controls by type-2 diabetes status (recent-onset, long-standing, none) (complete-case dataset)

### BMI (case)

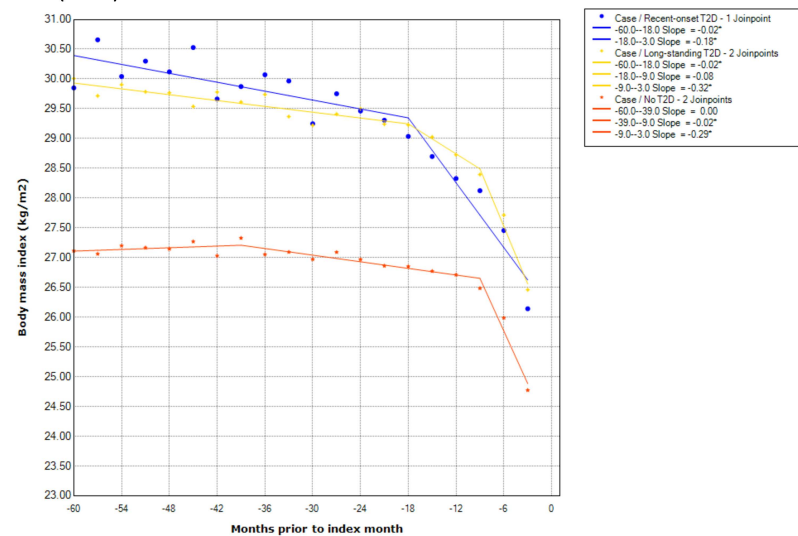

### BMI (control)

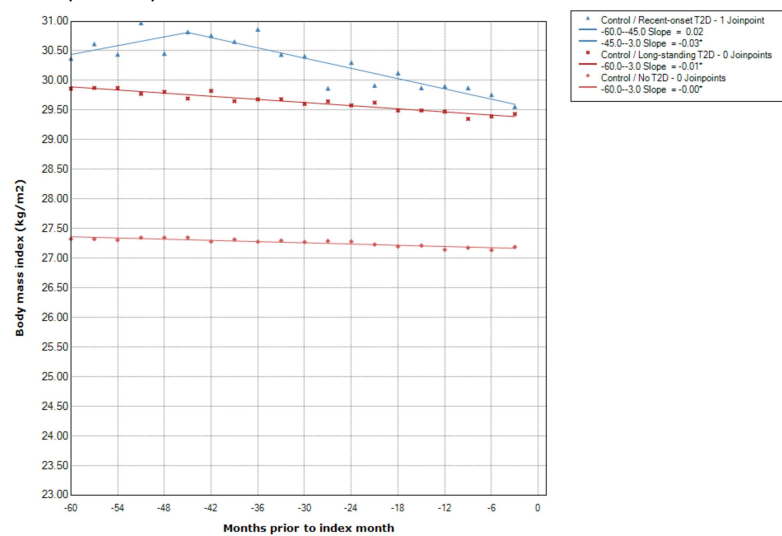

### HbA1c (case)

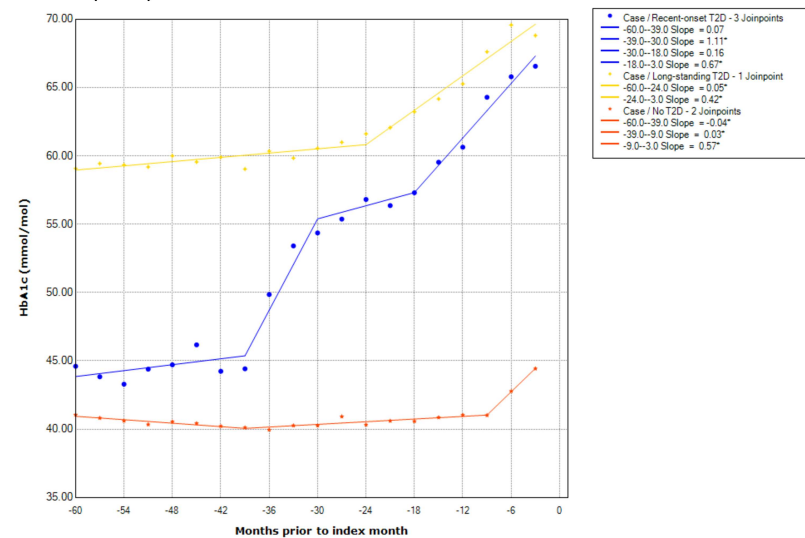

### HbA1c (control)

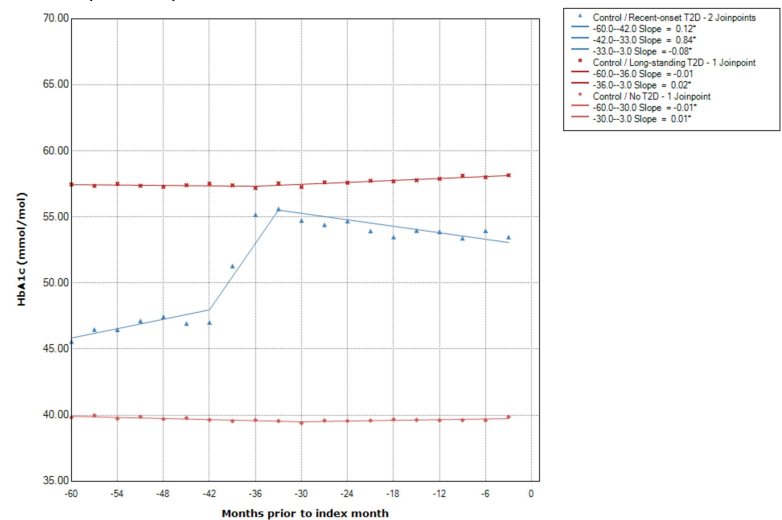

Bilirubin (case)

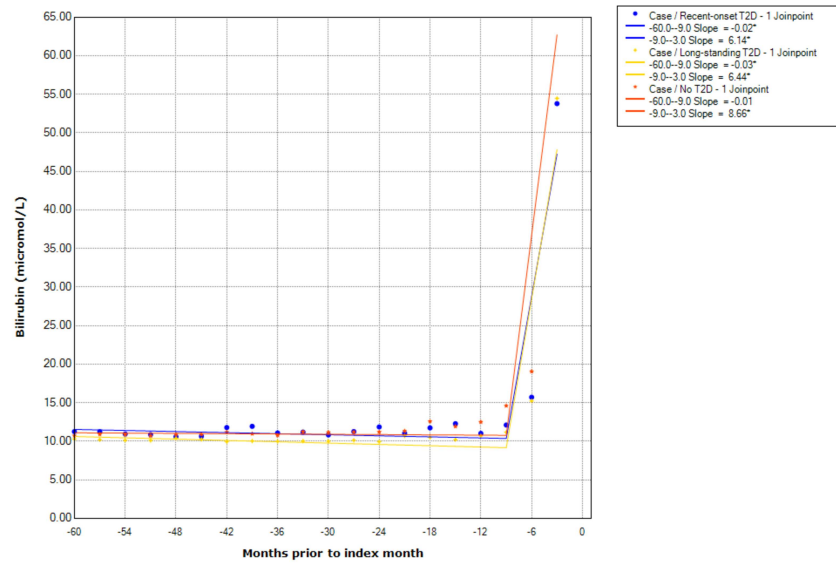

Bilirubin (control)

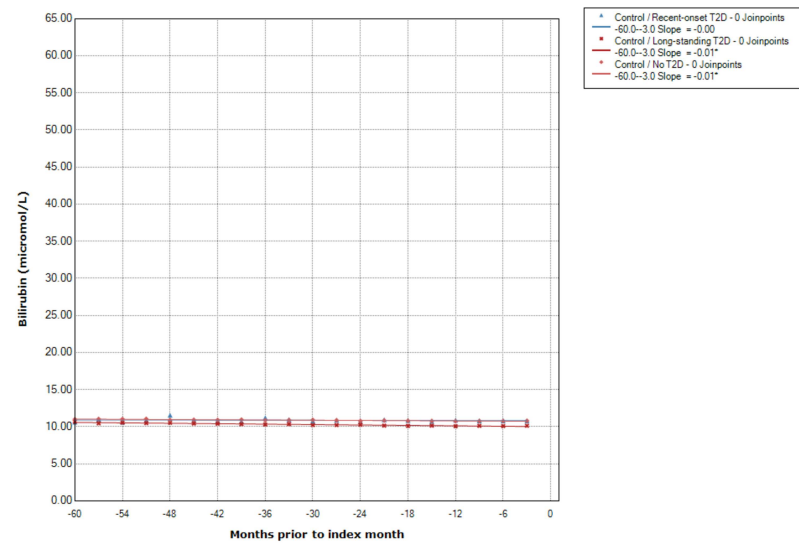

ALT (case)

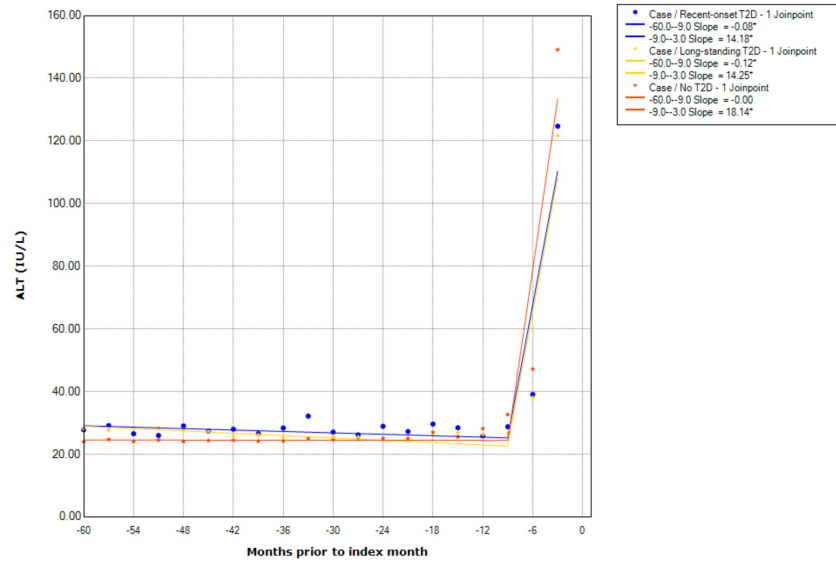

ALT (control)

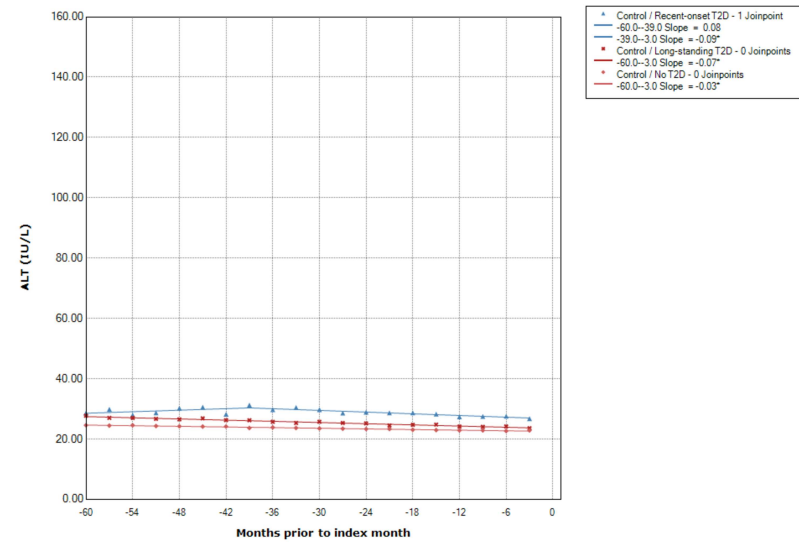

AST (case)

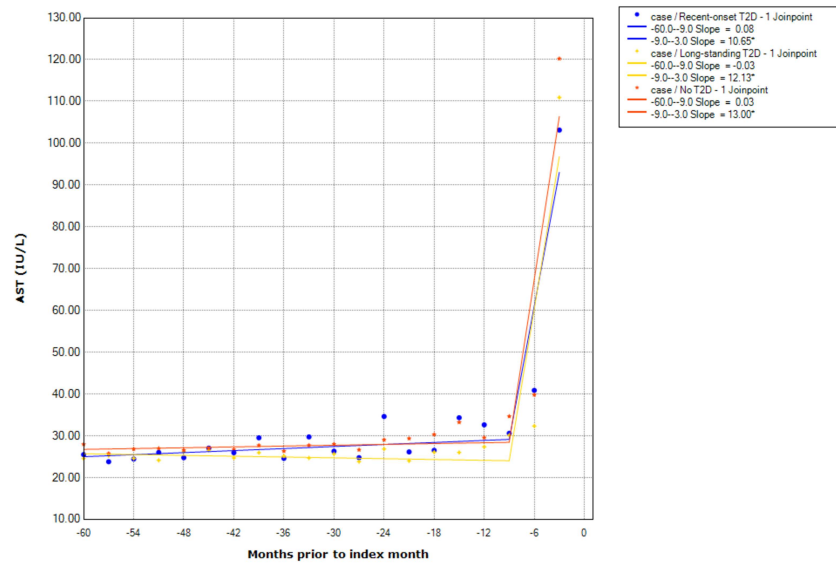

AST (control)

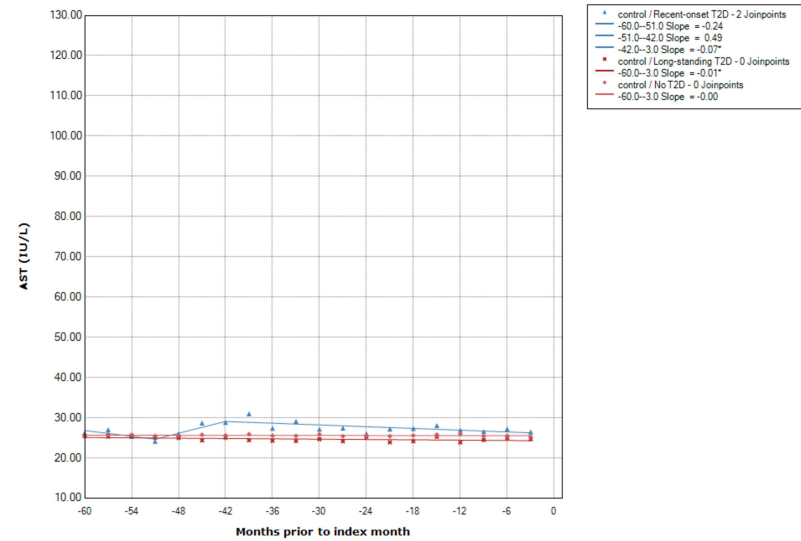

GGT (case)

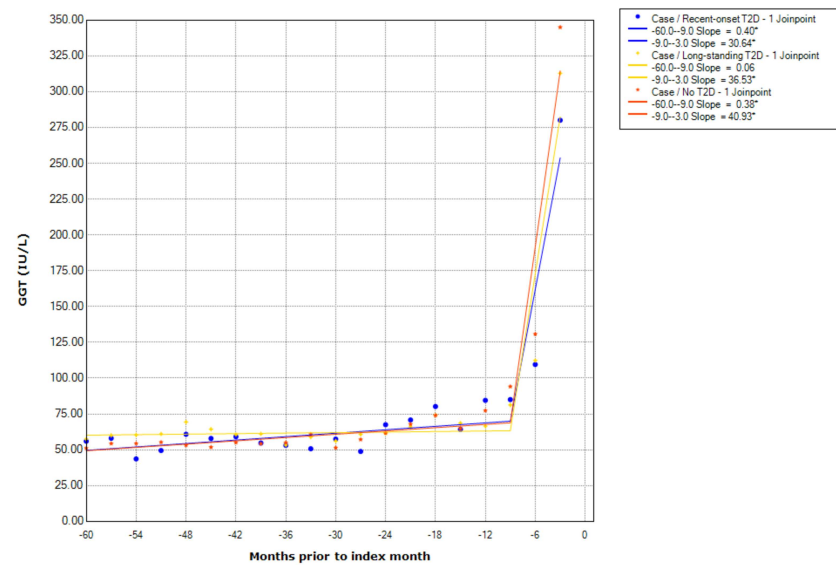

GGT (control)

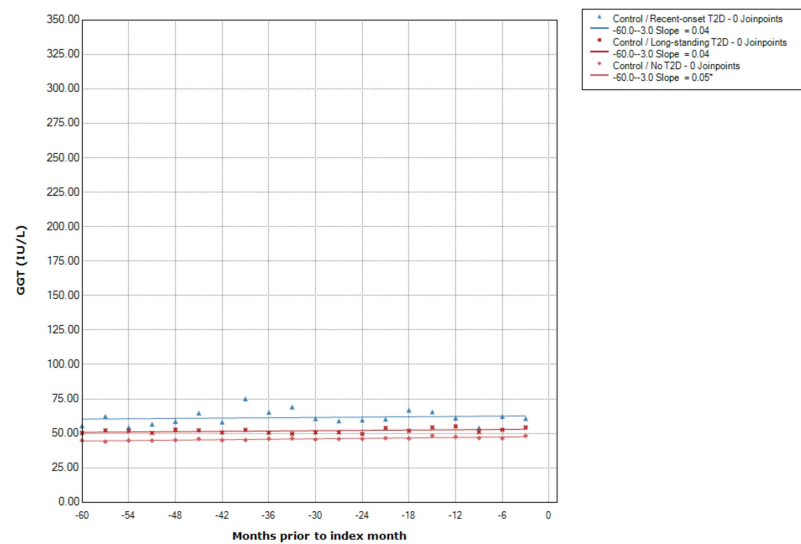

Haemoglobin (case)

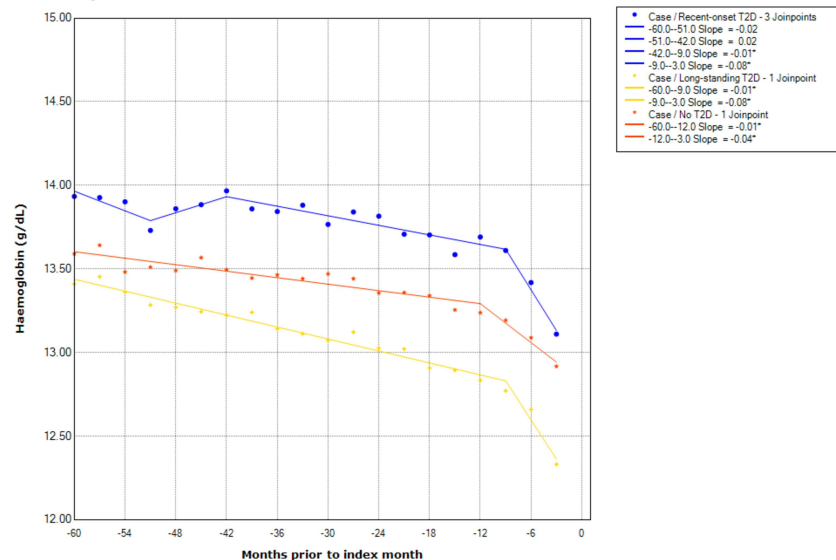

Haemoglobin (control)

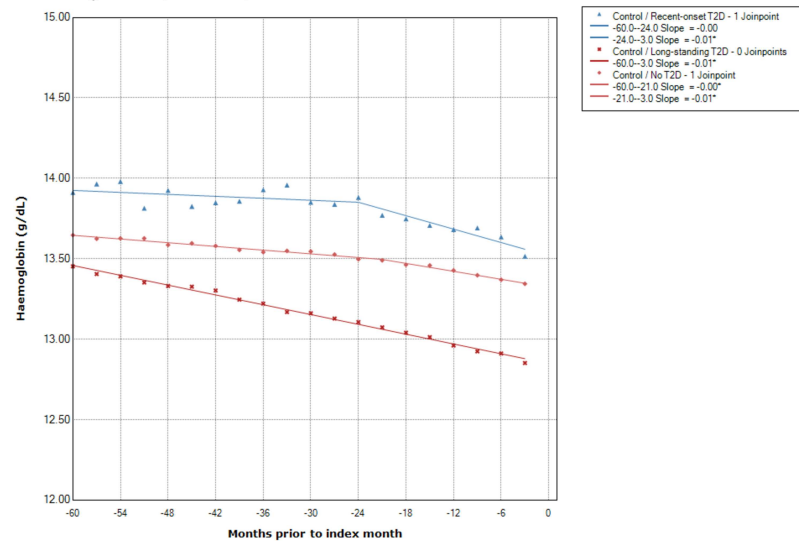

White blood cell (case)

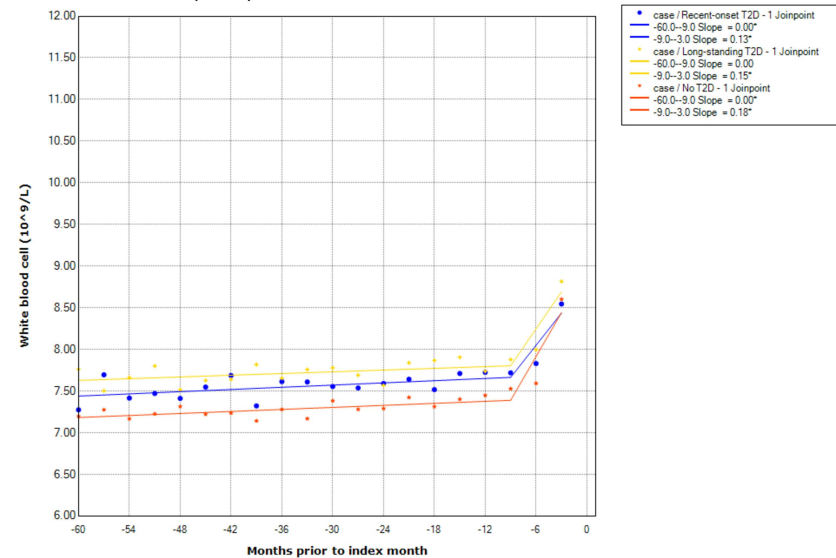

White blood cell (control)

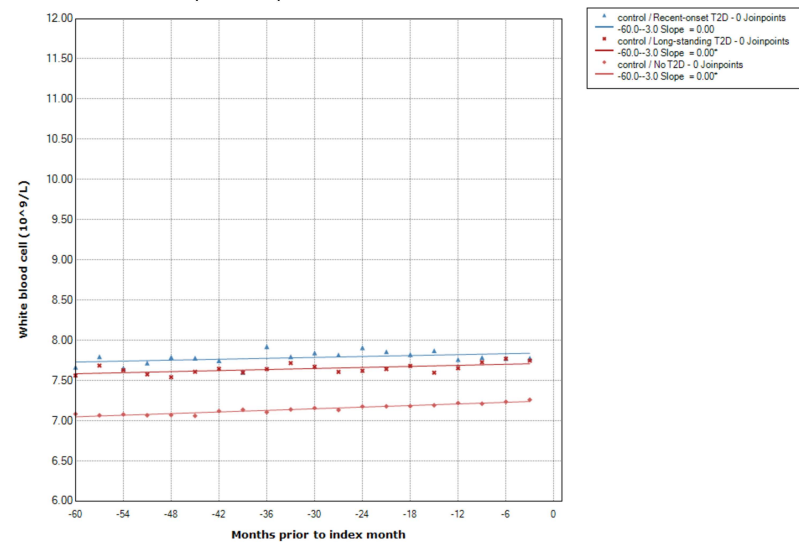



Platelet (case)

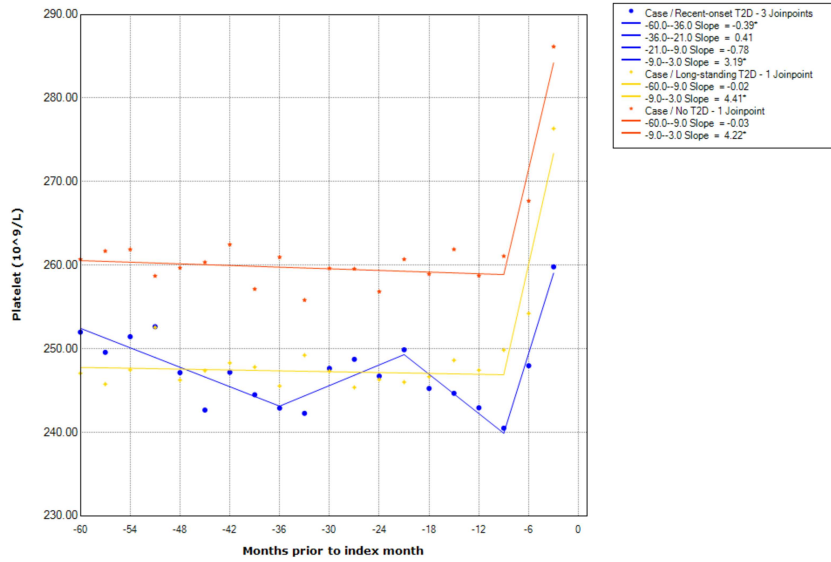

Platelet (control)

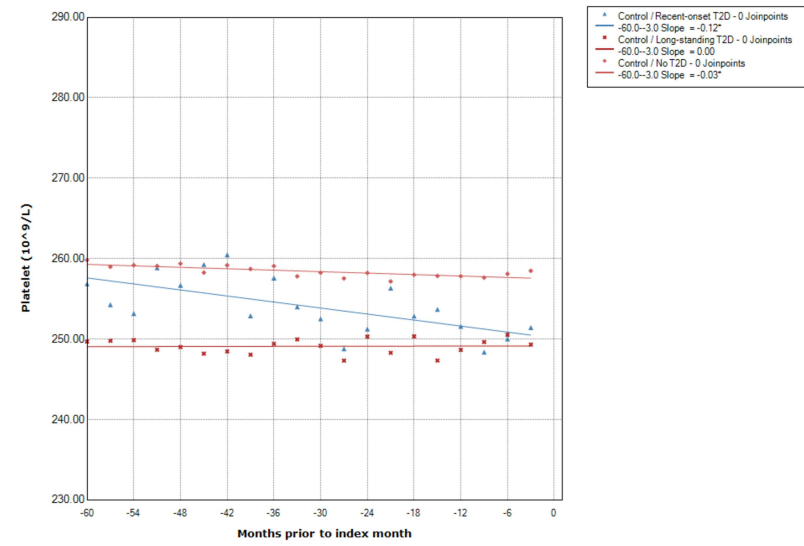

Figure S4: Five year time-trends of mean BMI and blood markers prior to index month for PDAC cases/controls by type-2 diabetes status using fractional polynomial fit and corresponding 95% CI (multiply imputed)

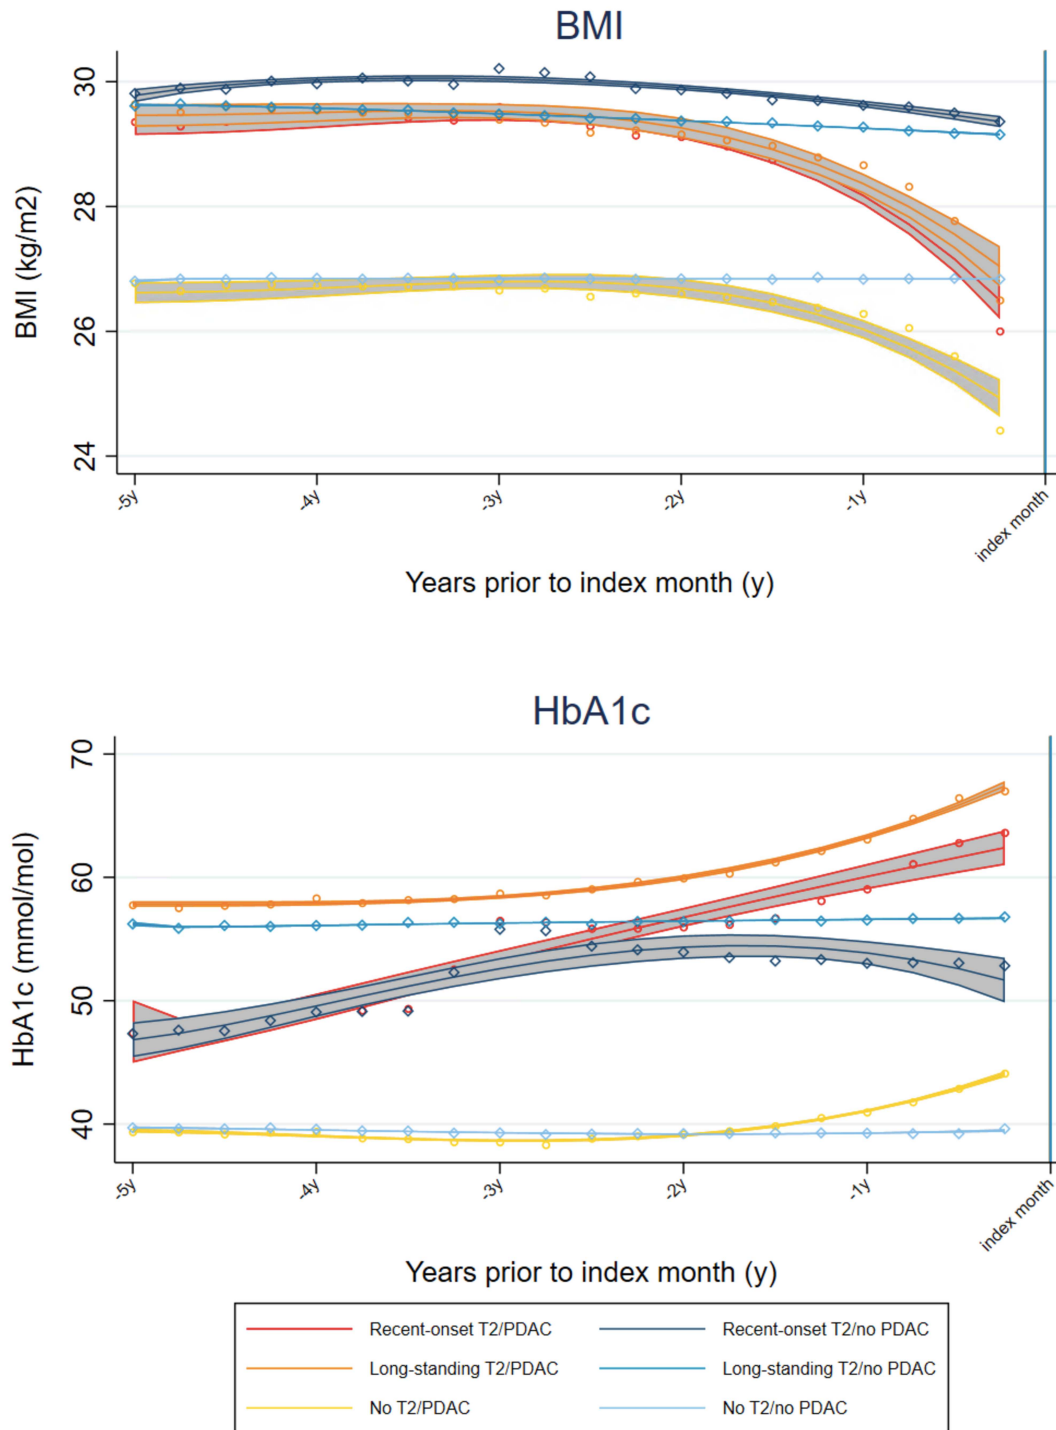



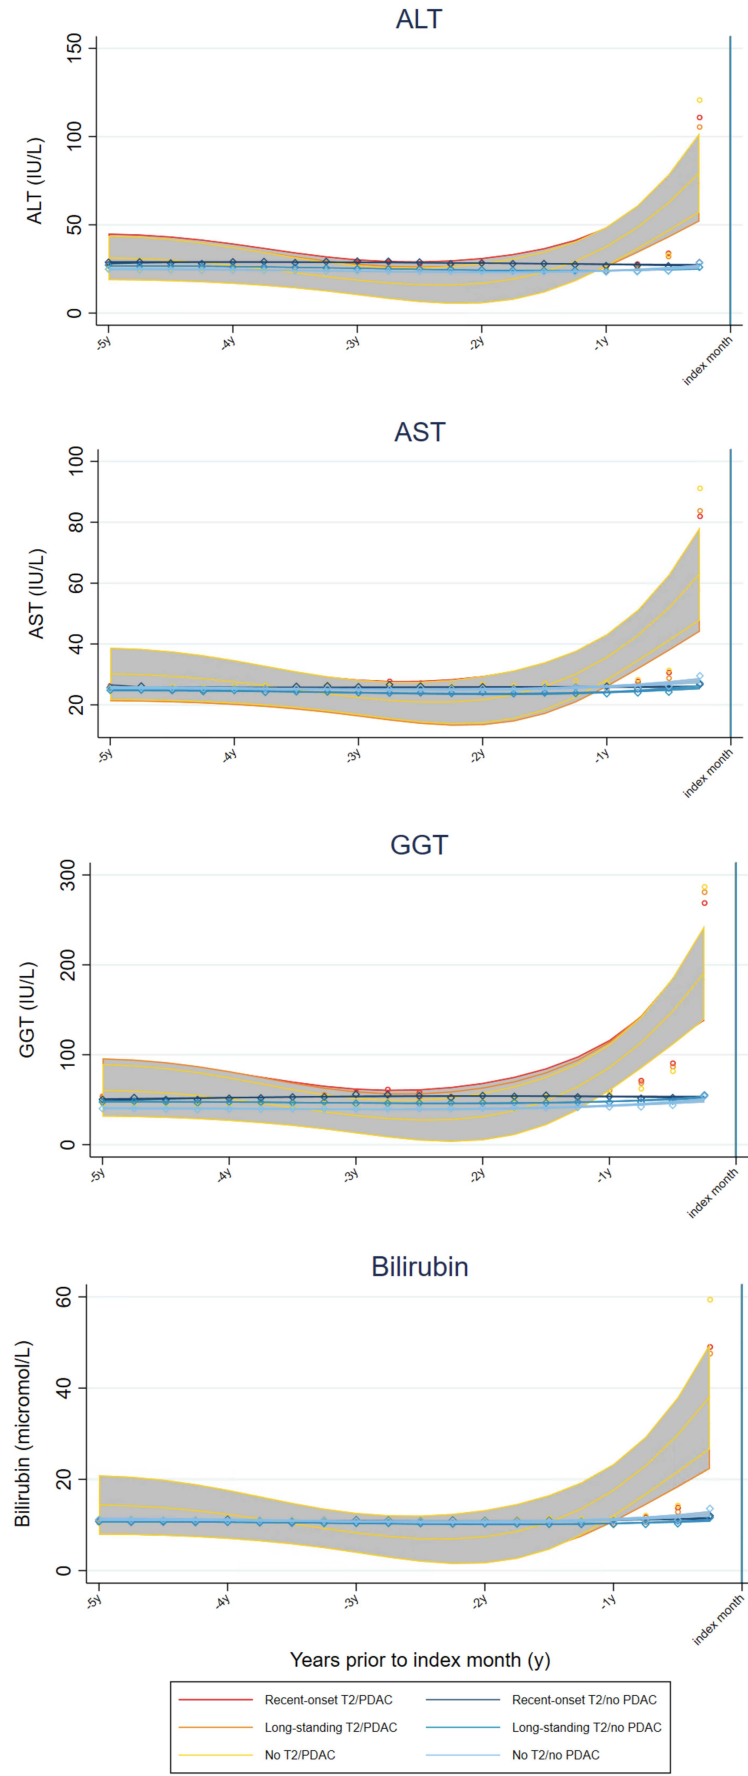

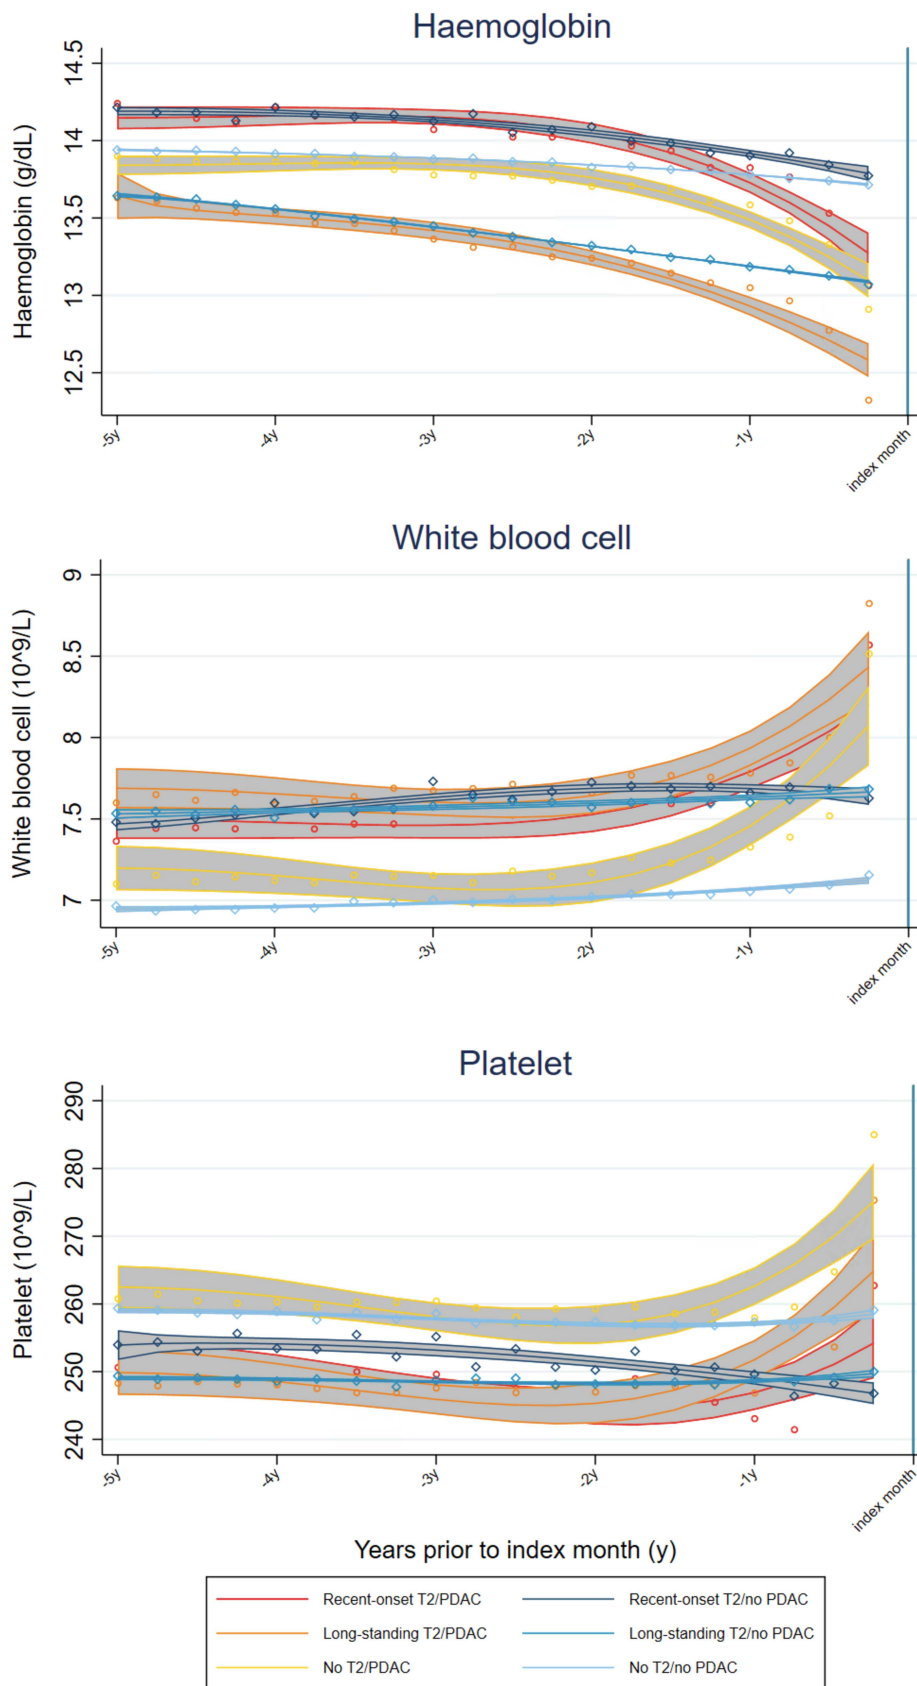

Figure S5: Five year time-trends of mean blood counts (haemoglobin, white blood cell, platelet) prior to index month for PDAC cases/controls by type-2 diabetes status using fractional polynomial fit and corresponding 95% Ci (complete-case)

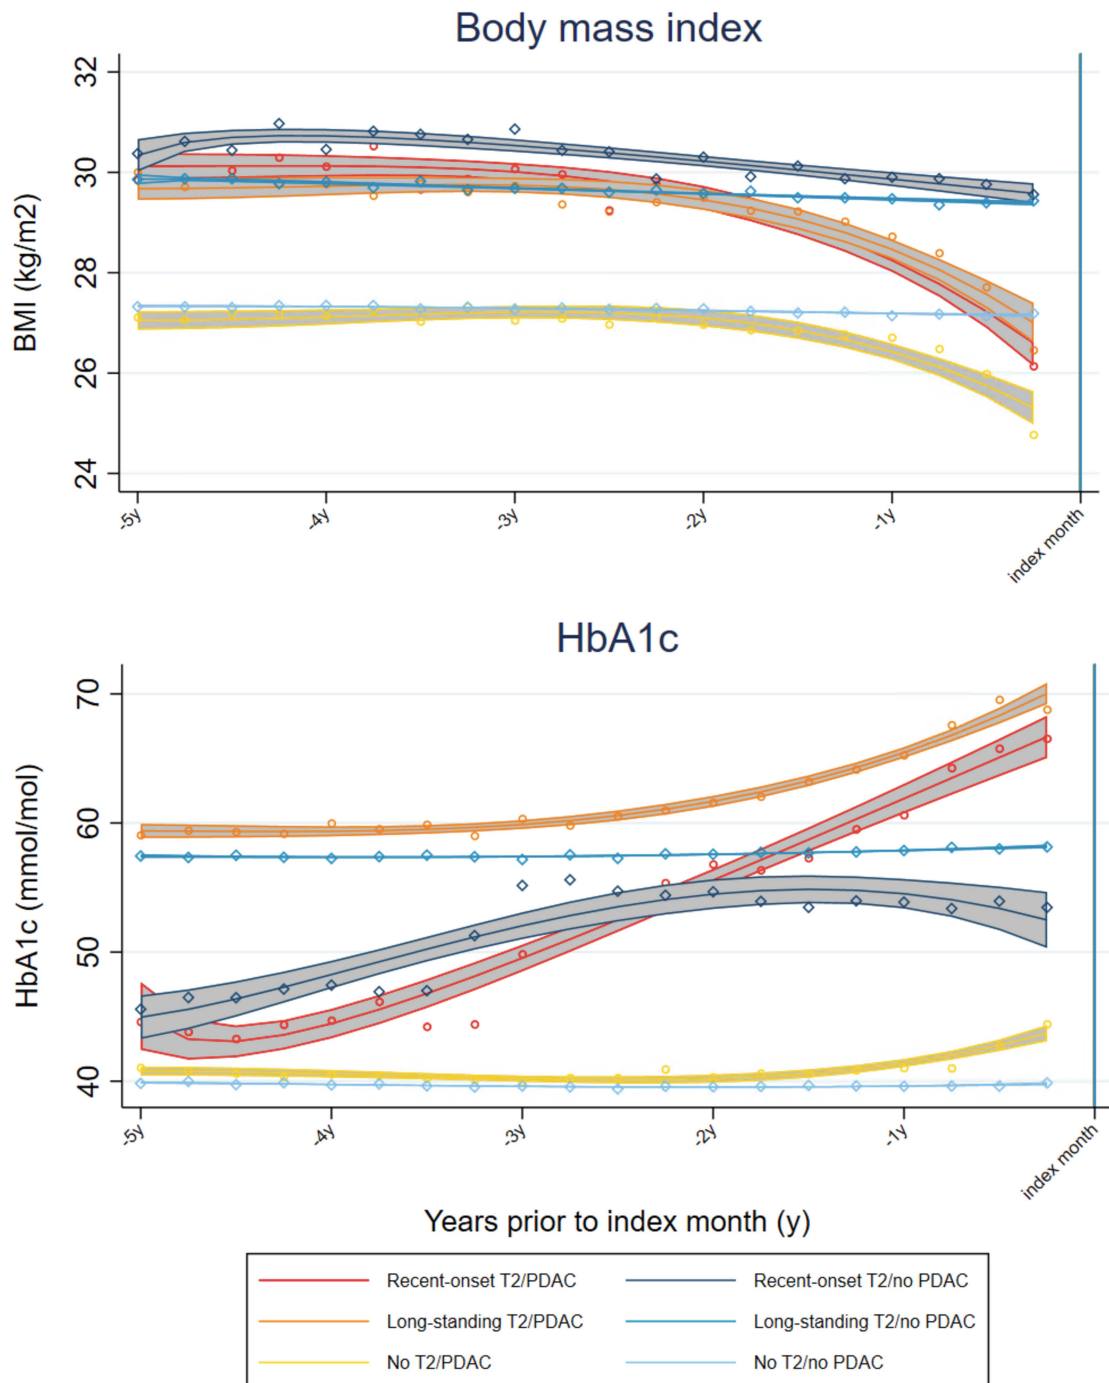

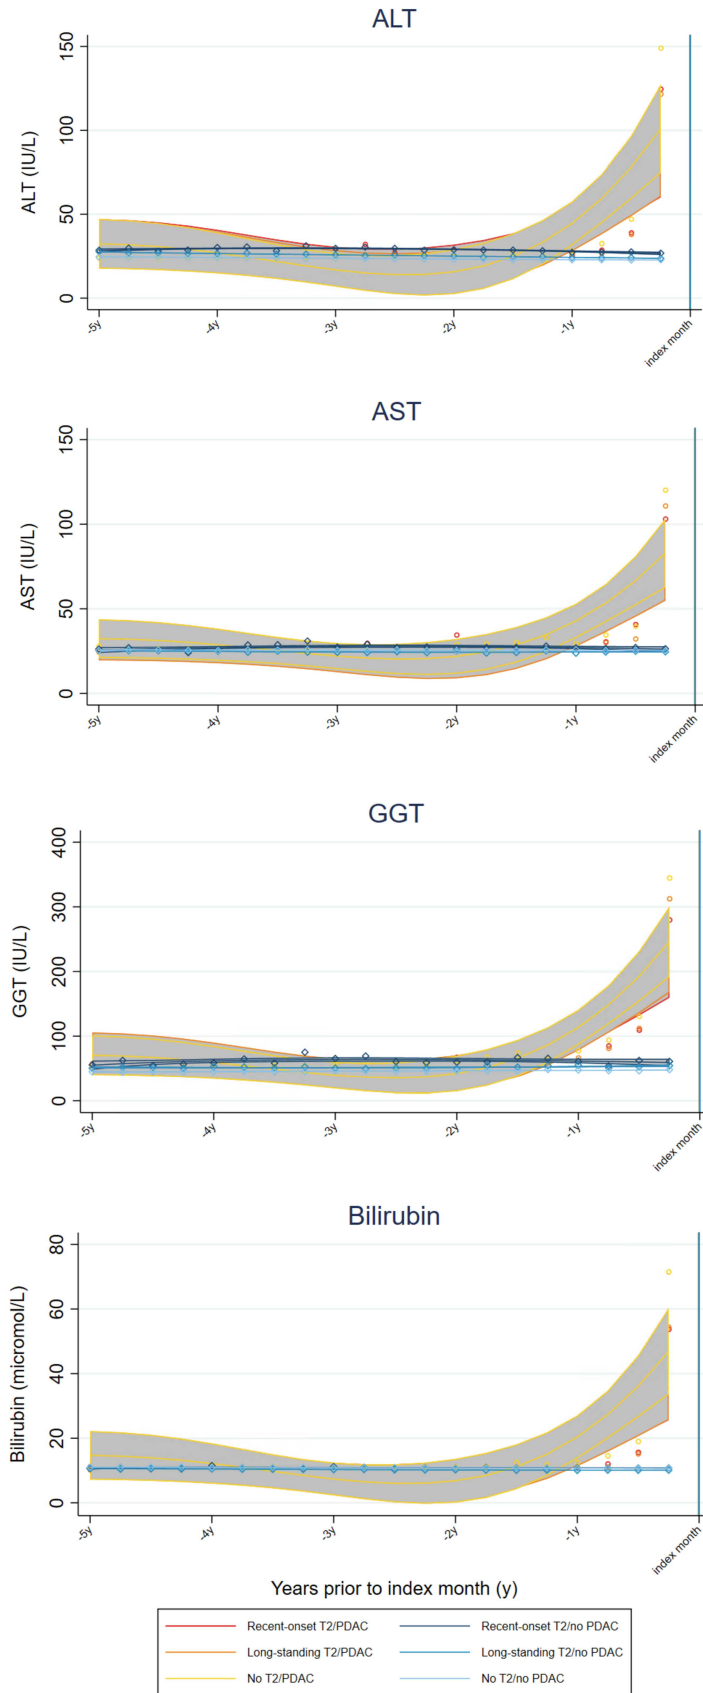

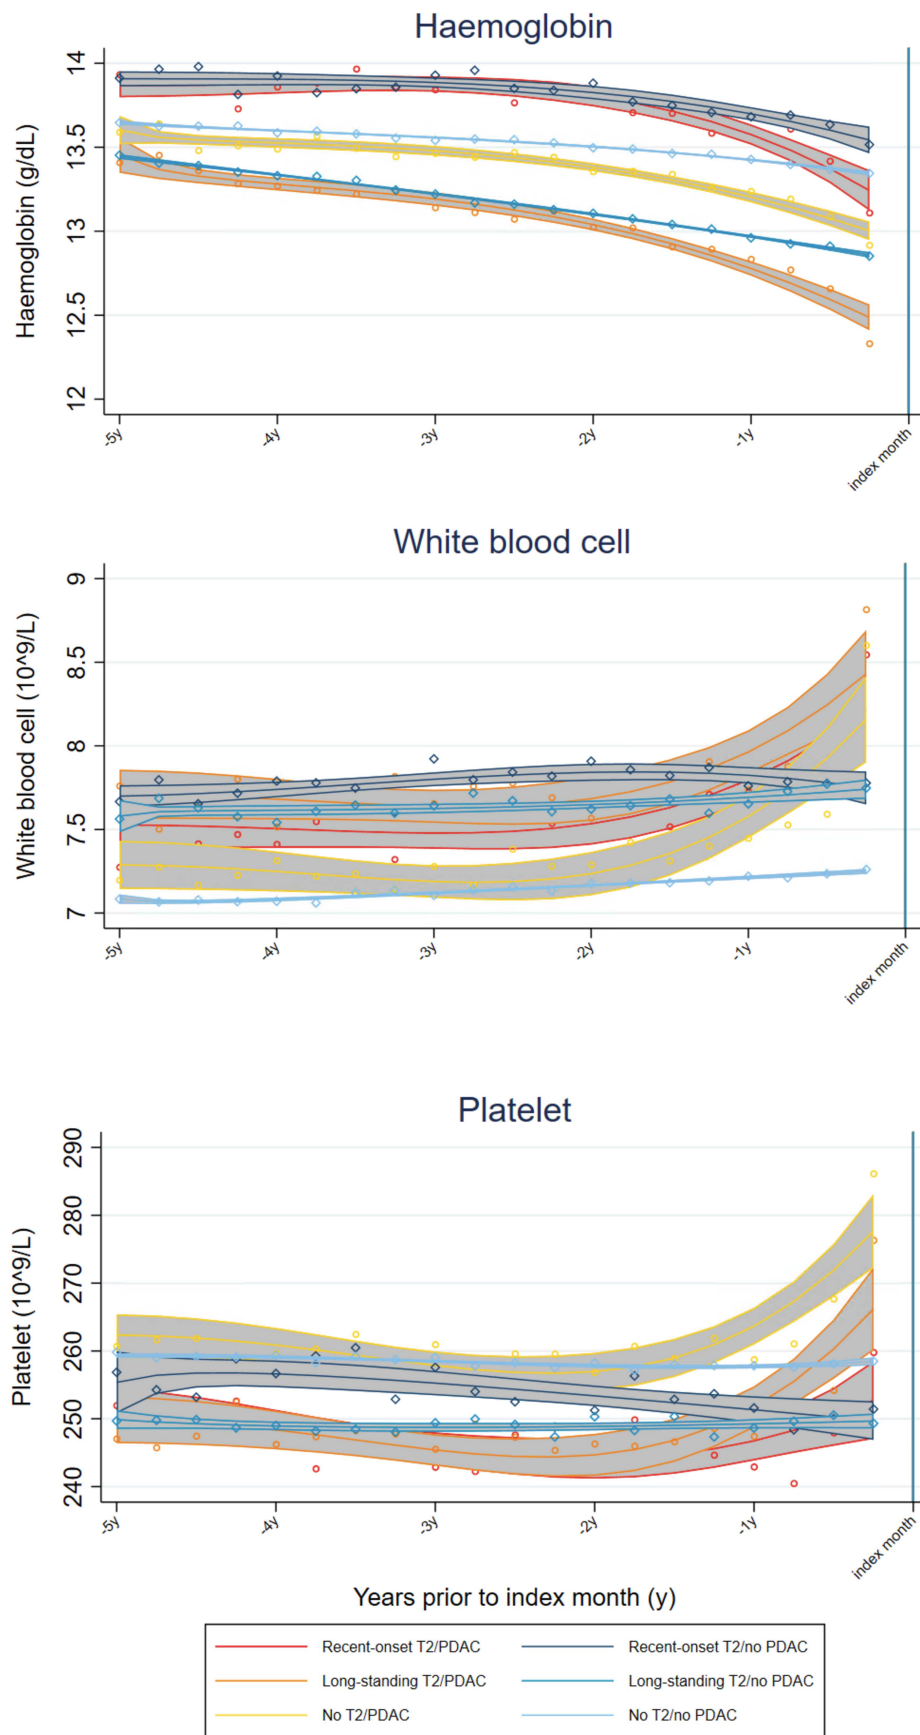

Figure S6: Association of comorbidities with risk of PDAC by onset time; recent-onset defined as within 2 years prior to index date, long-standing defined as more than 2 years prior to index date.<sup>a</sup>

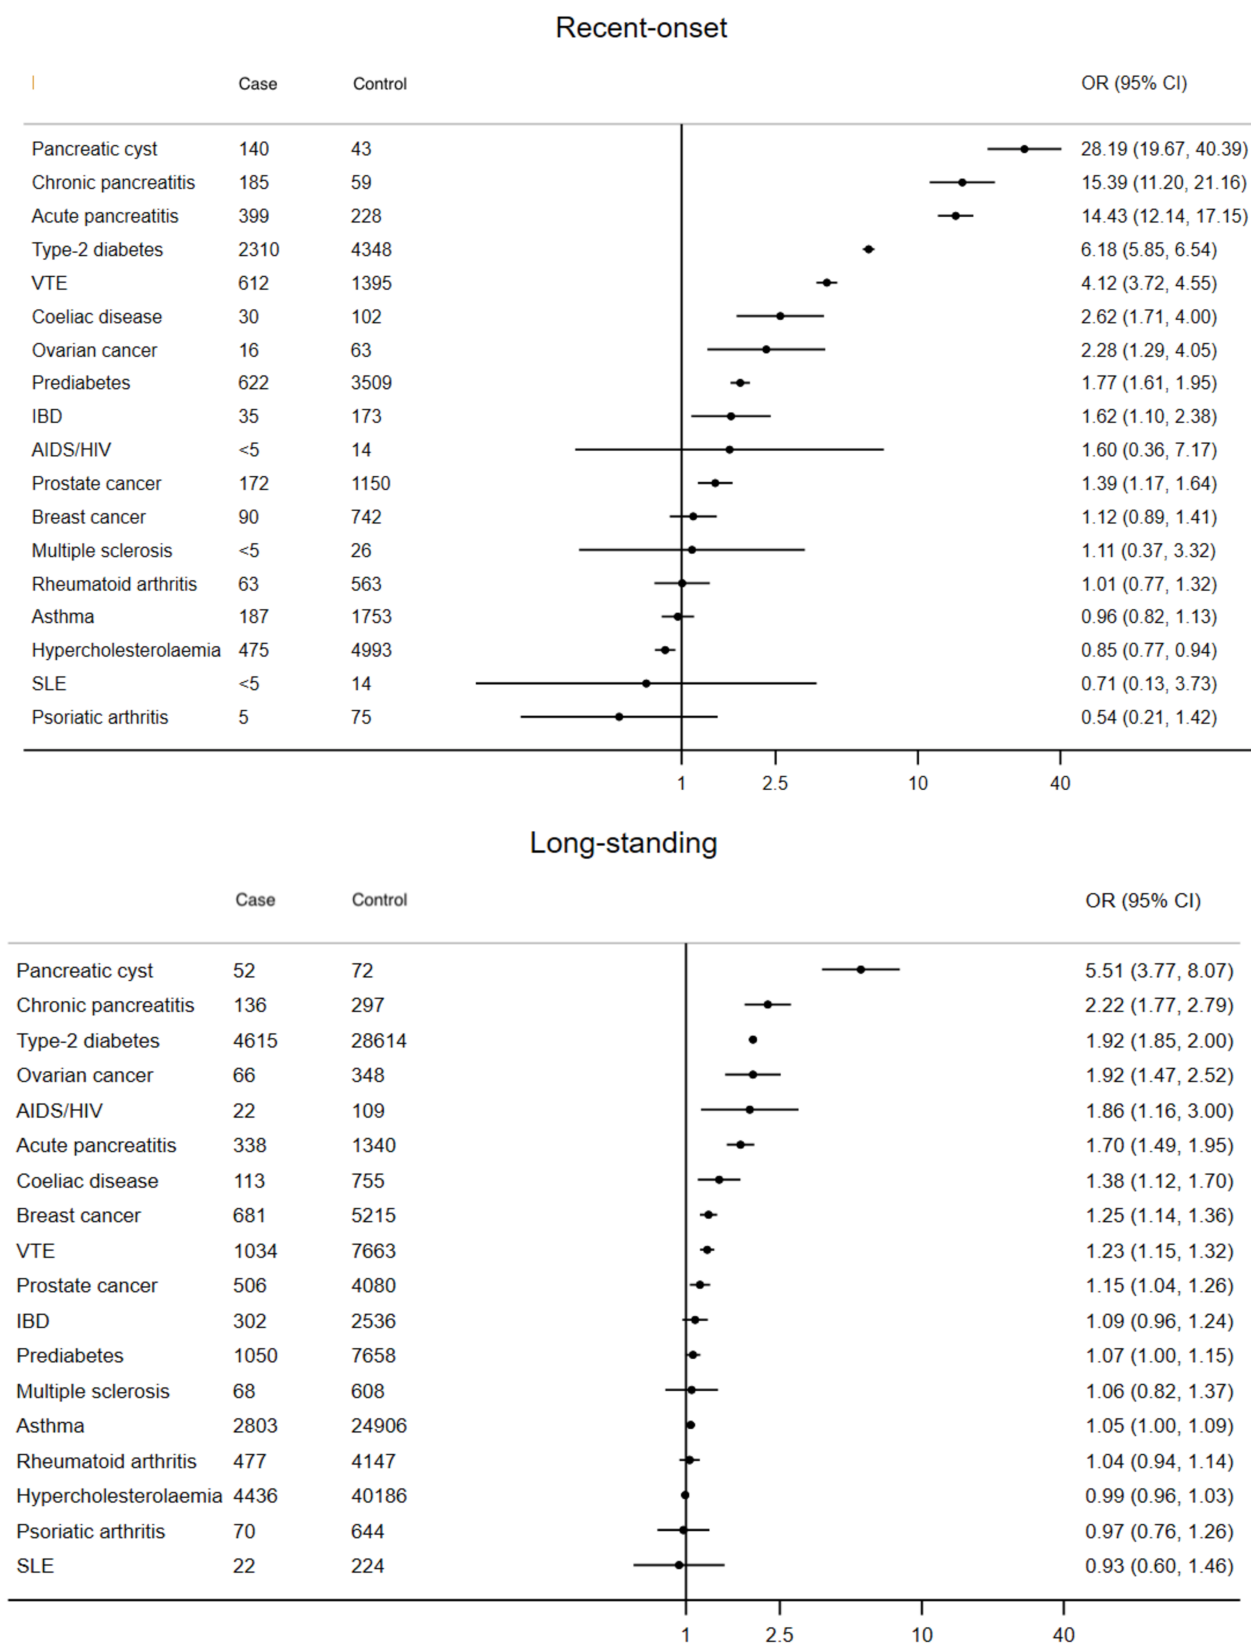

<sup>a</sup>Estimates are odds ratios adjusted for ethnic group, deprivation quintile, BMI, smoking and alcohol consumption. Reference group represent those with no corresponding comorbidities.

Figure S7: Association of medications with risk of PDAC by onset time; recent-onset defined as within 2 years prior to index date, long-standing defined as more than 2 years prior to index date.<sup>a</sup>

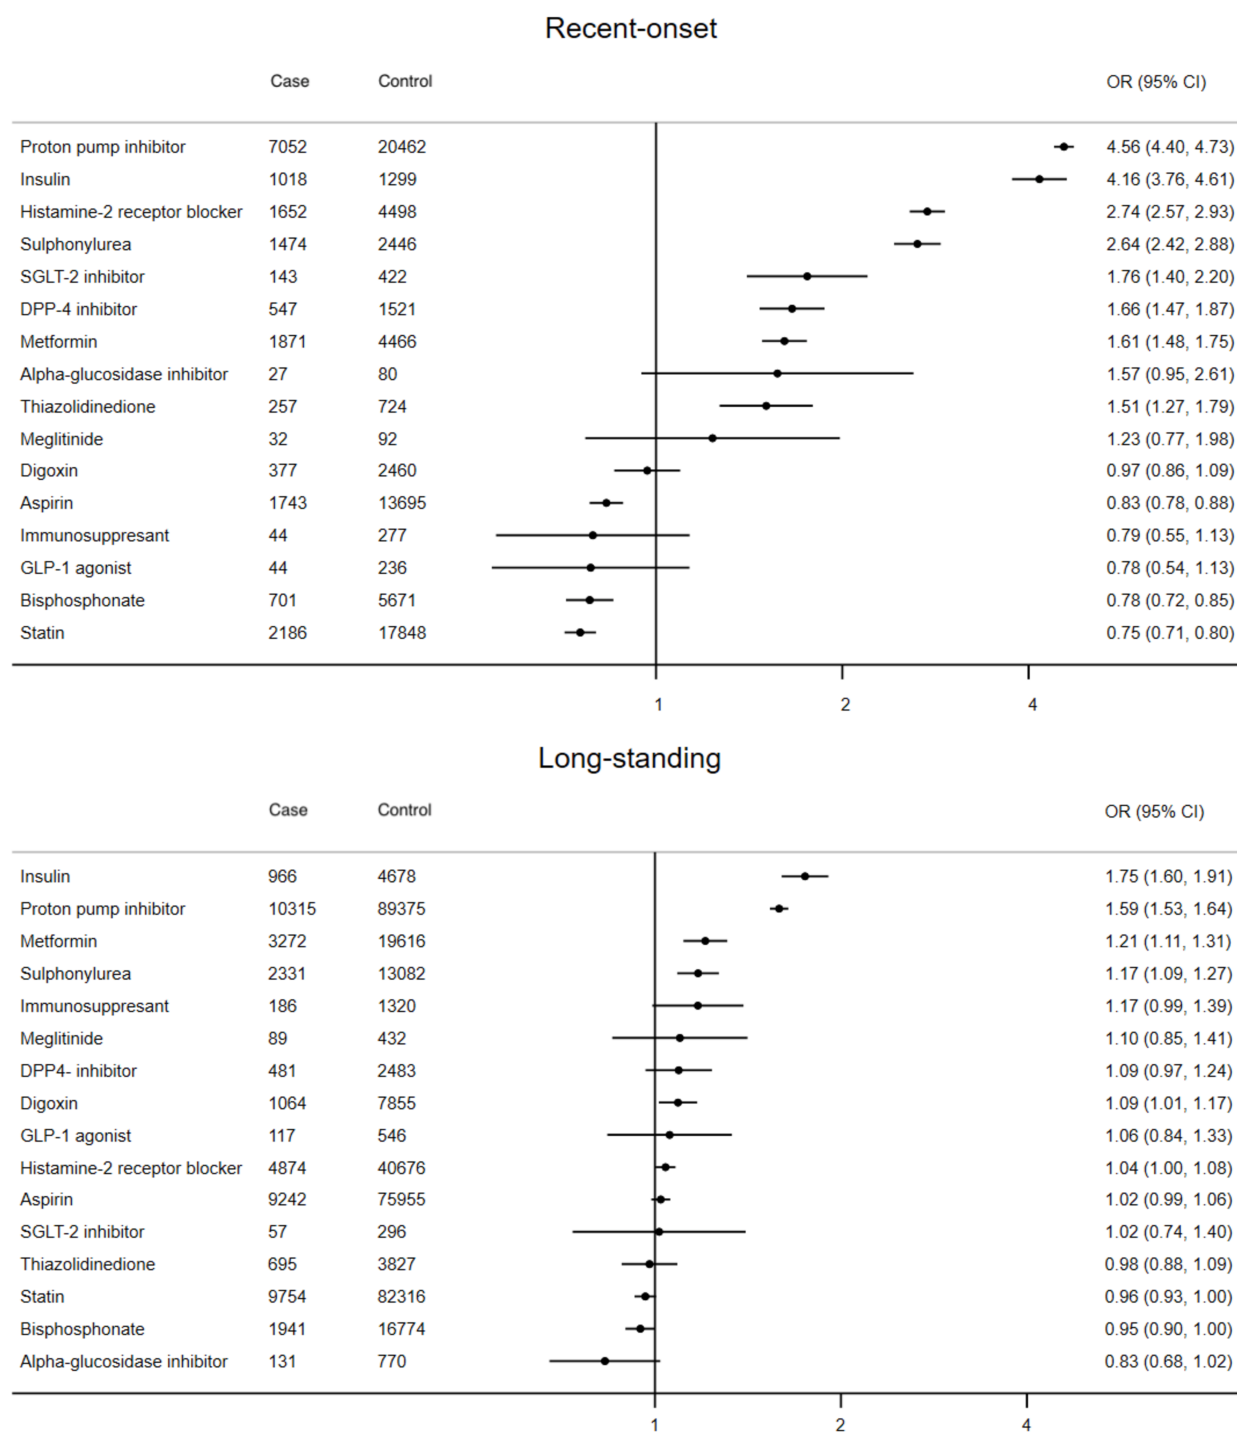

<sup>a</sup>Estimates are odds ratios adjusted for ethnic group, deprivation quintile, BMI, smoking, alcohol consumption and comorbidities. Reference group represent those with no corresponding medications.



Figure S8 (a): Subgroup analysis by age - association of comorbidities and risk of PDAC in age &lt; 60 at index date

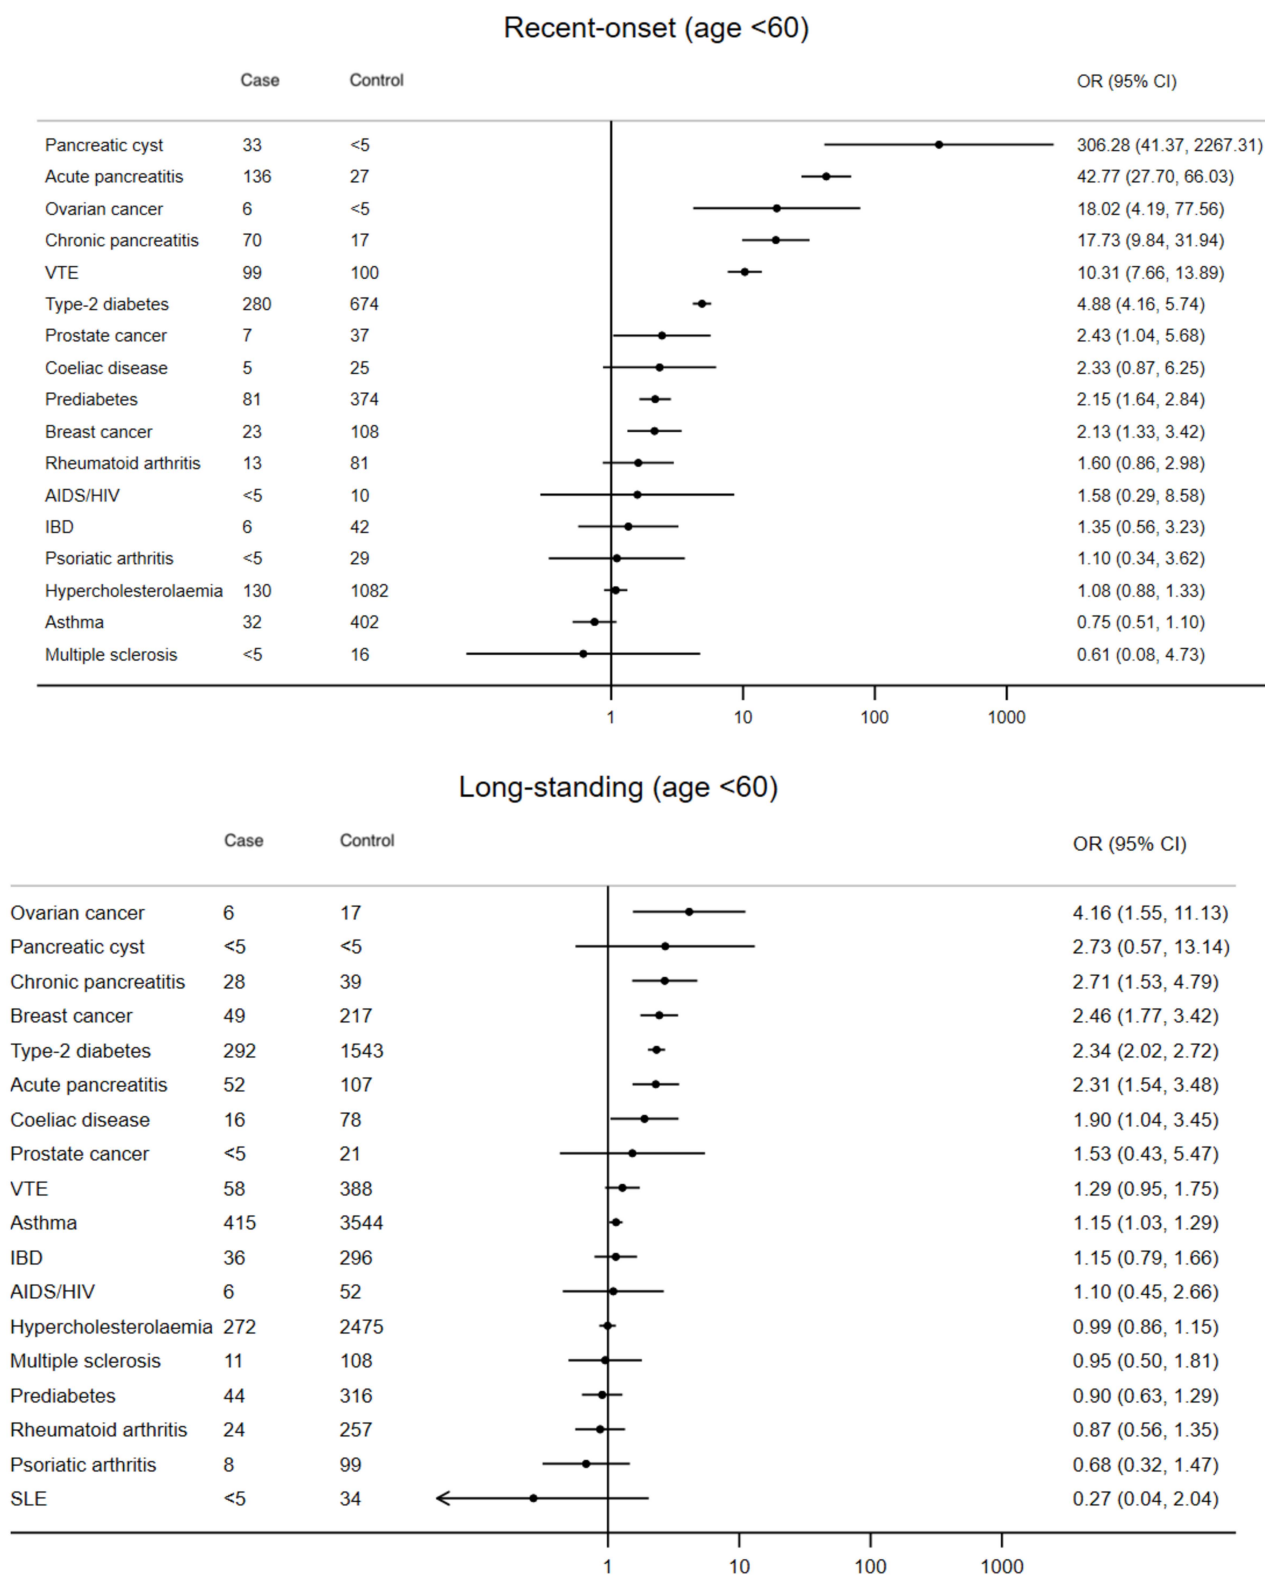



Figure S8 (b): Subgroup analysis by age - association of comorbidities and risk of PDAC in age  $\geq 60$  at index date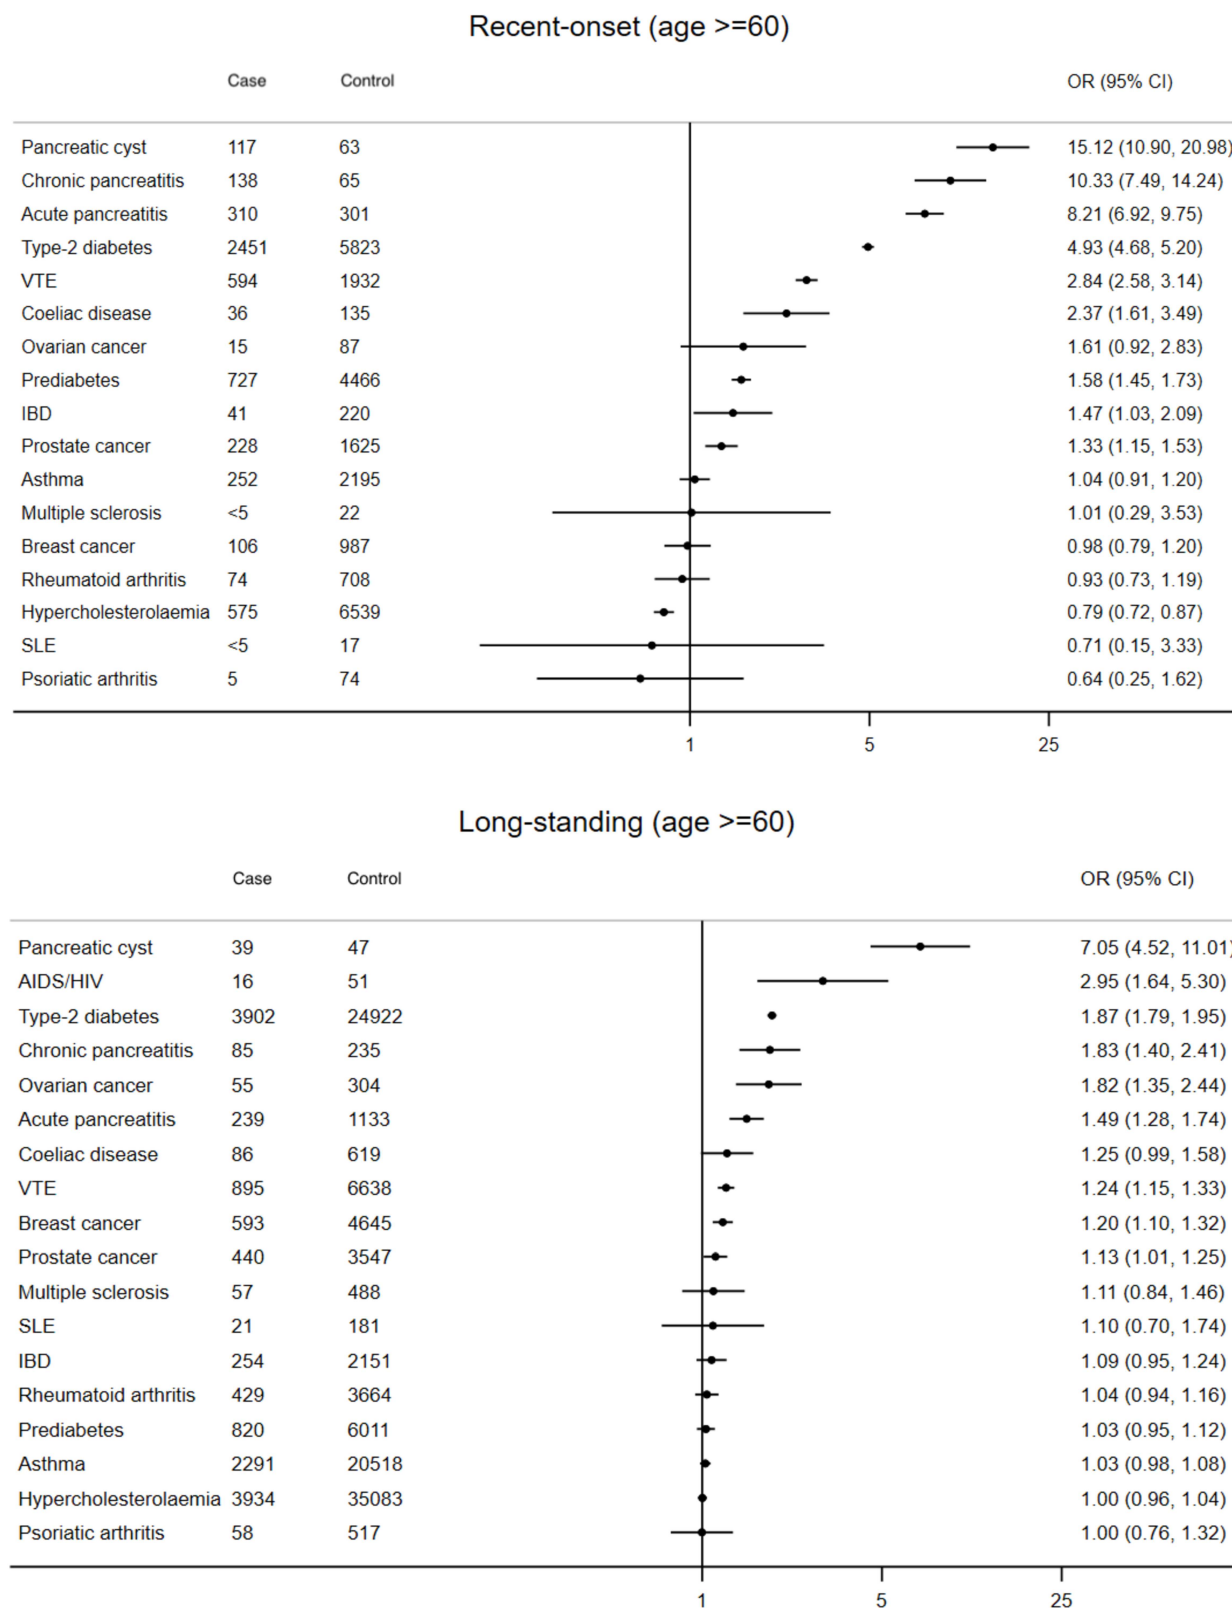

Figure S9 (a): Subgroup analysis by sex - association of comorbidities and risk of PDAC in female

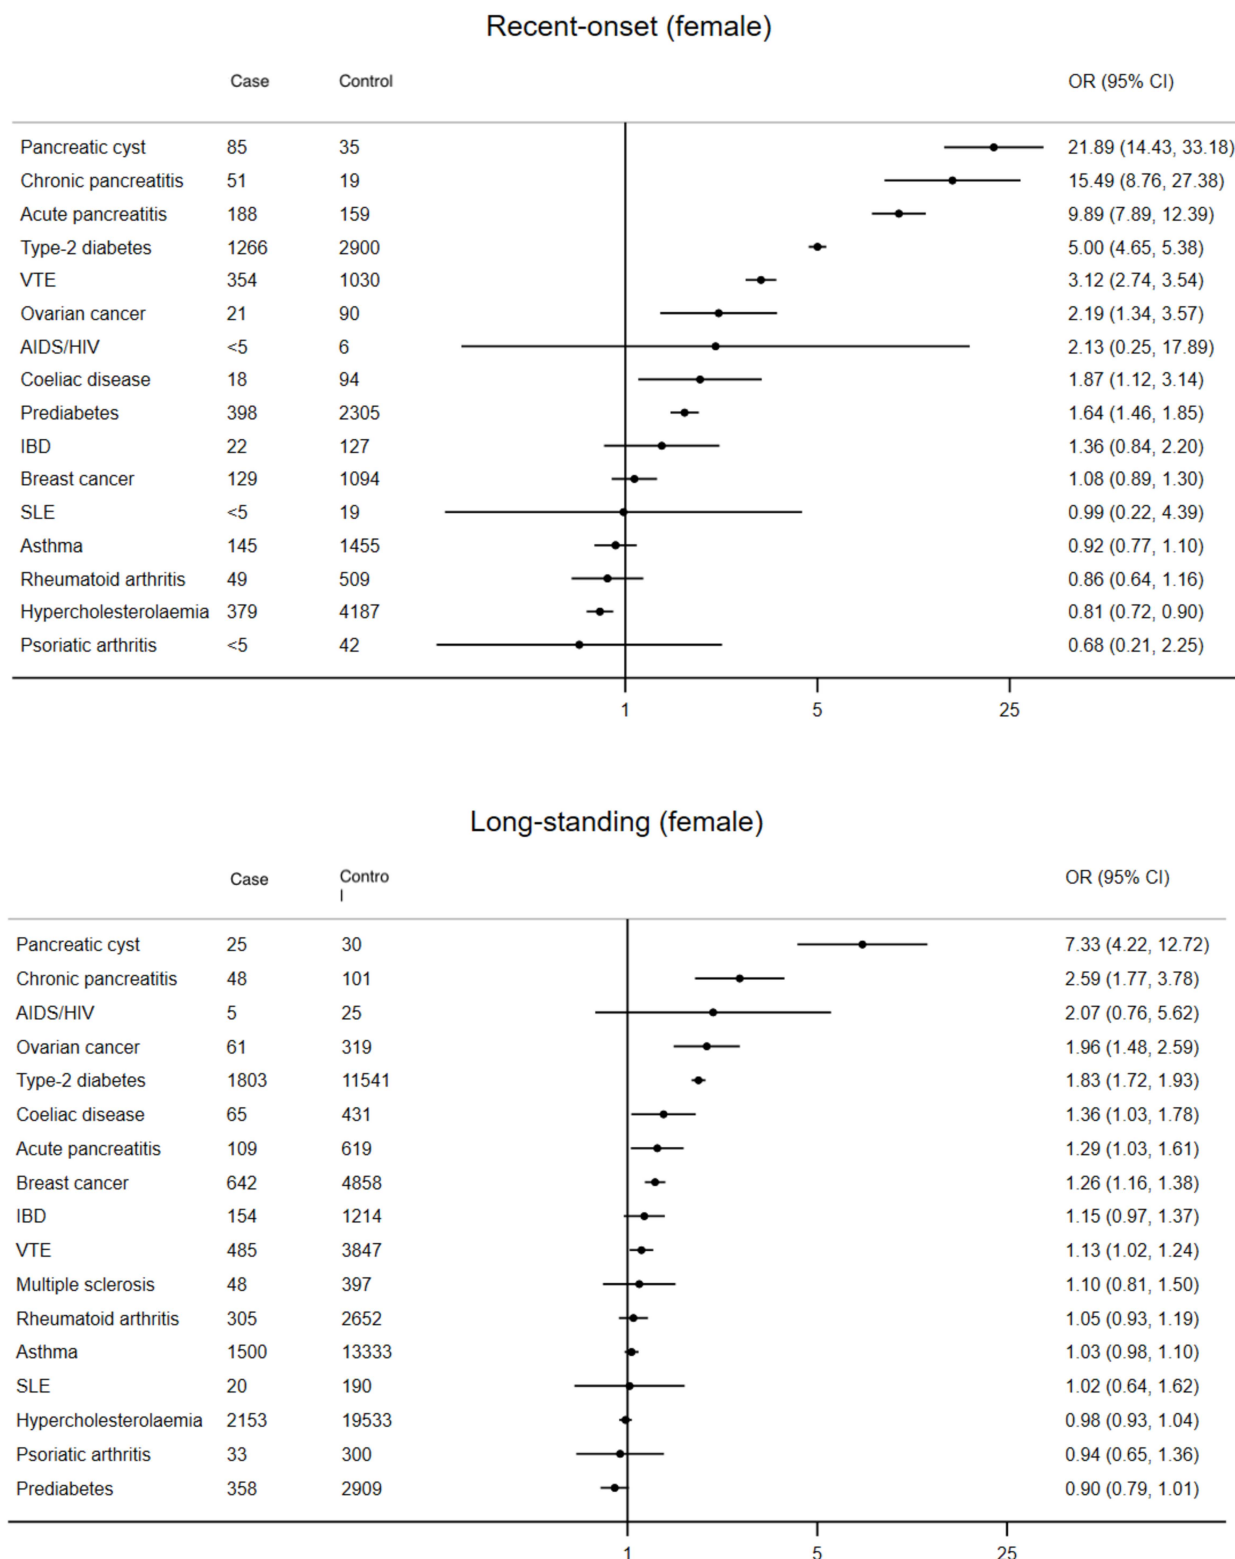

Figure S9 (b): Subgroup analysis by sex - association of comorbidities and risk of PDAC in male

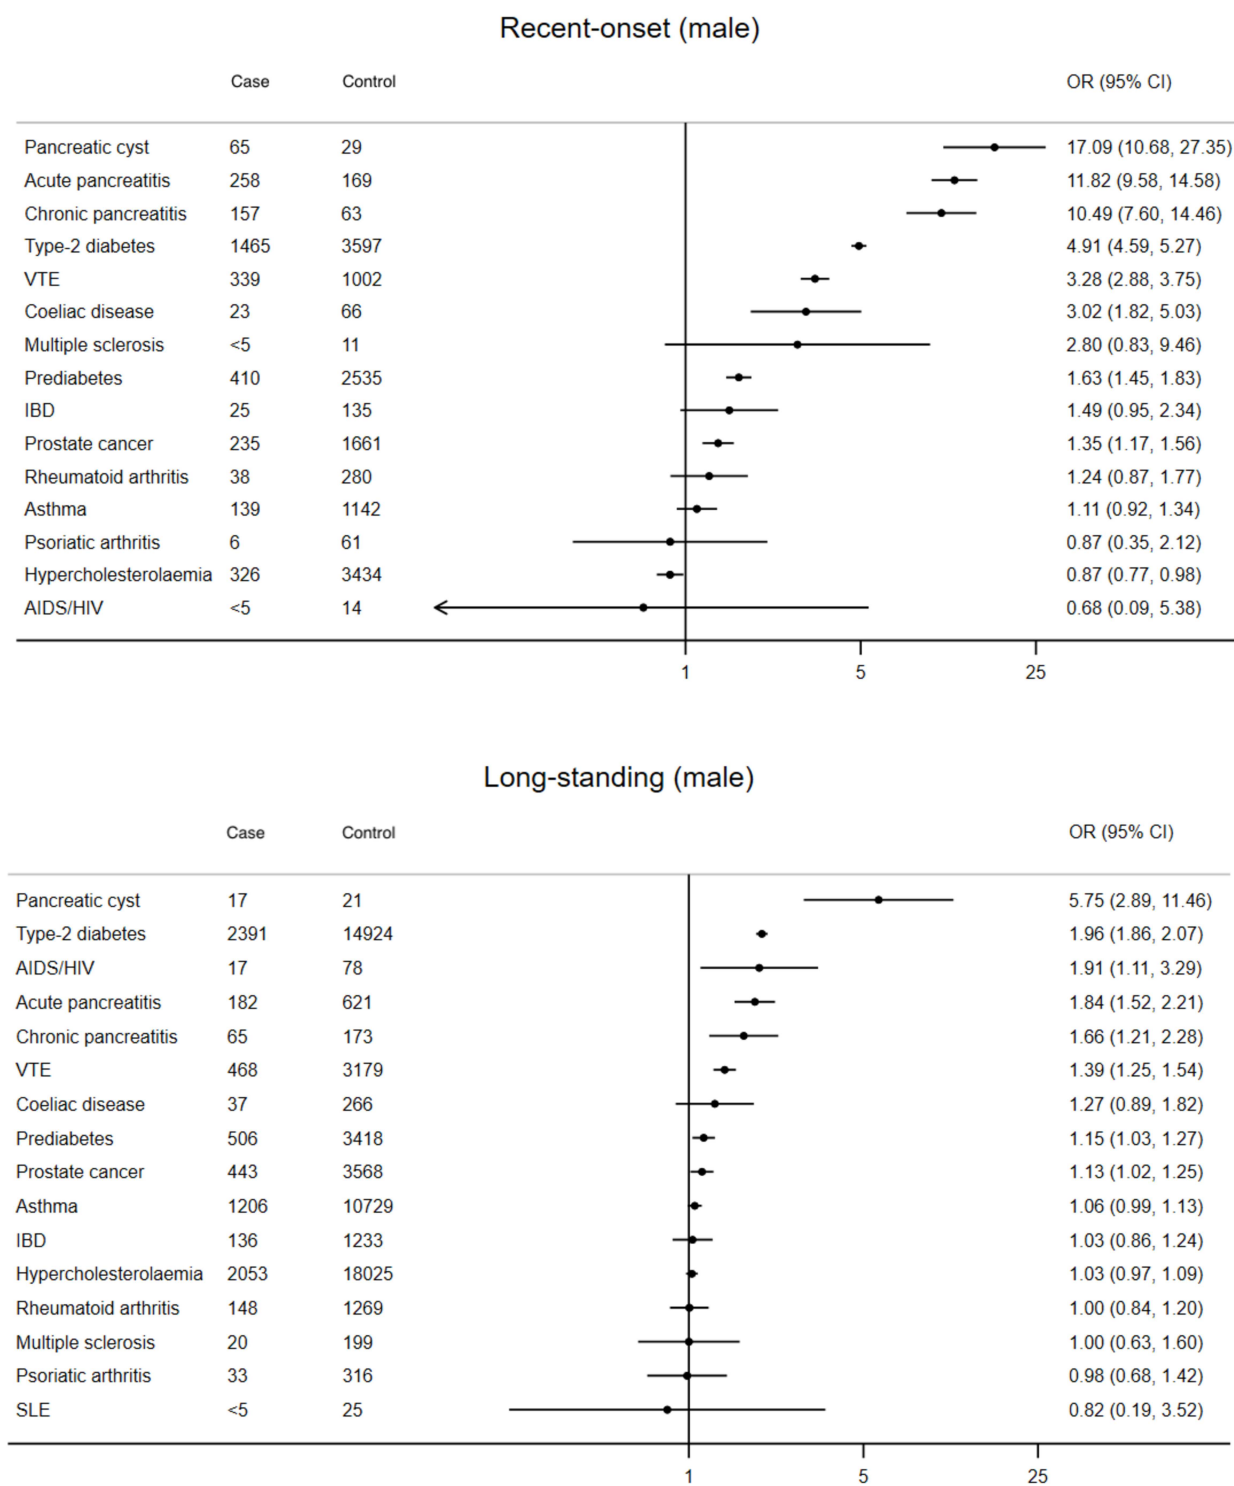

Figure S10 (a): Subgroup analysis by year of diagnosis - association of comorbidities and risk of PDAC in diagnosis year 2000-2010 (or matching year in controls)

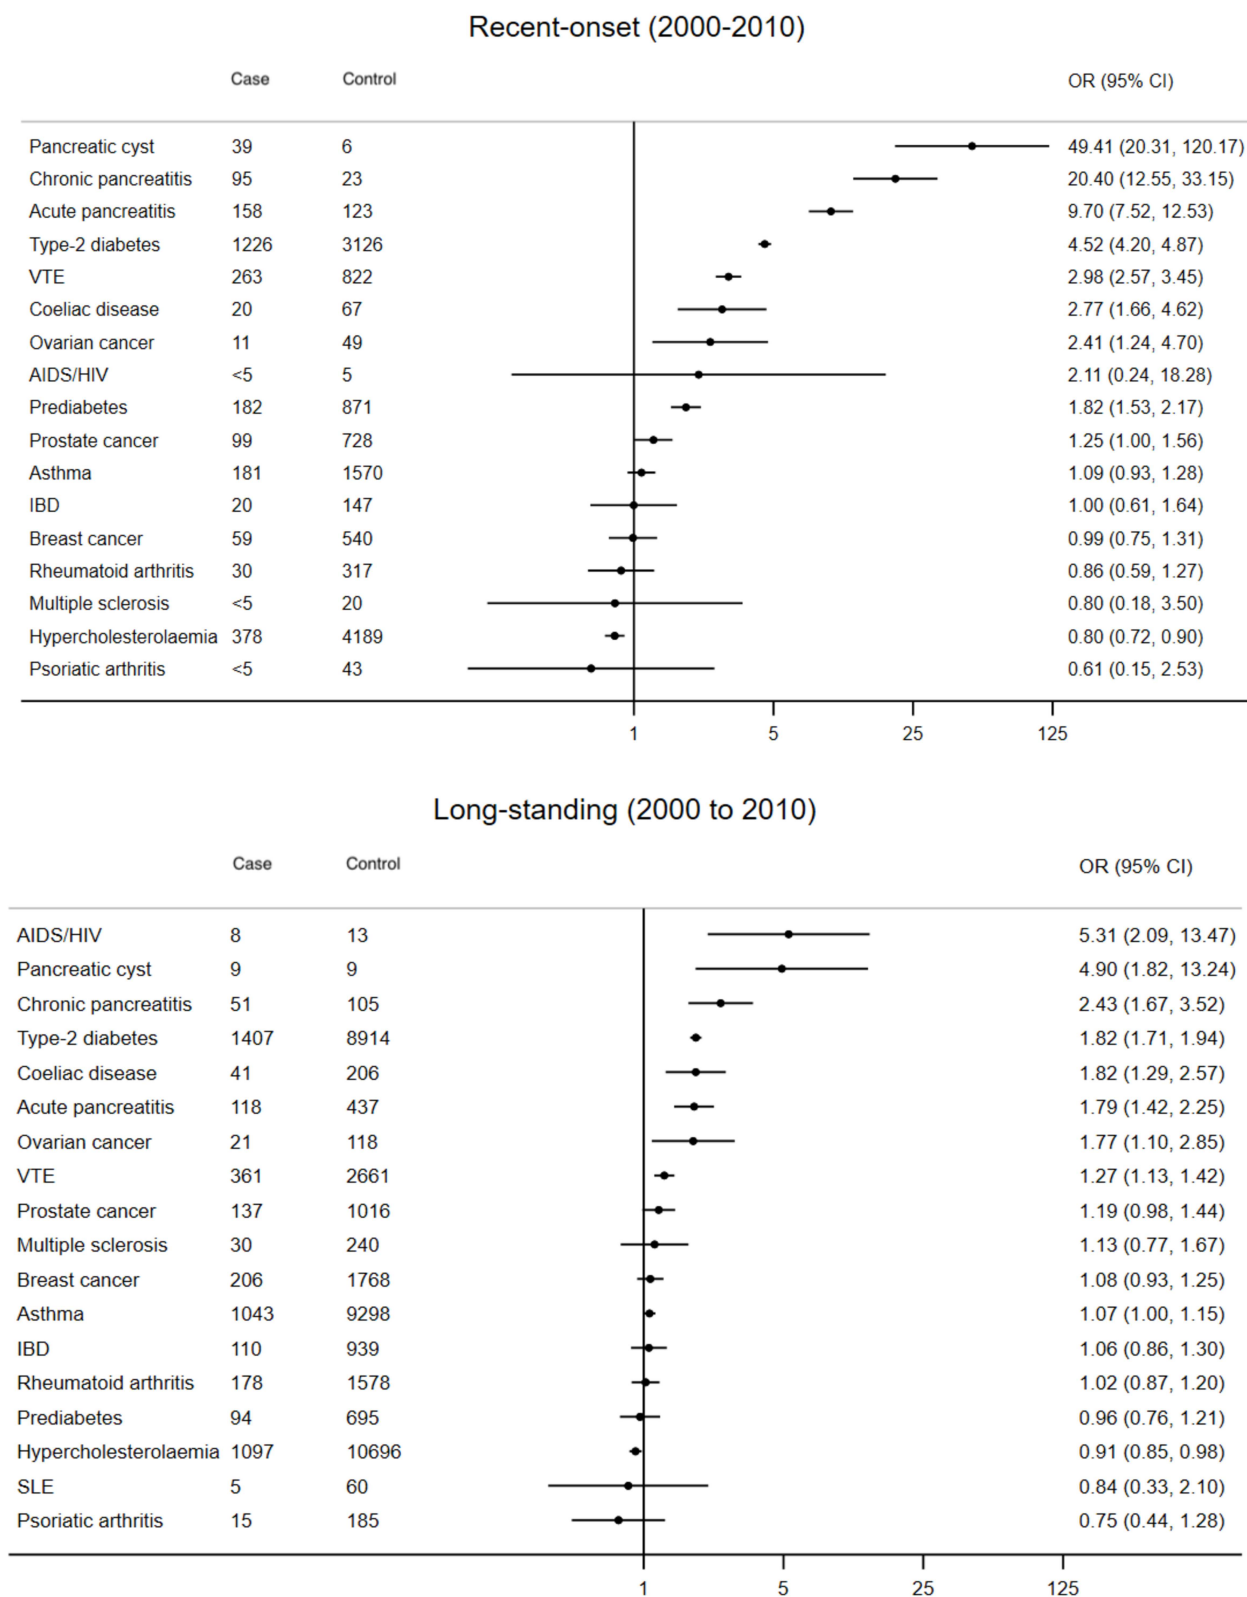

Figure S10 (b): Subgroup analysis by year of diagnosis- association of comorbidities and risk of PDAC in diagnosis year 2011-2020 (or matching year in controls)

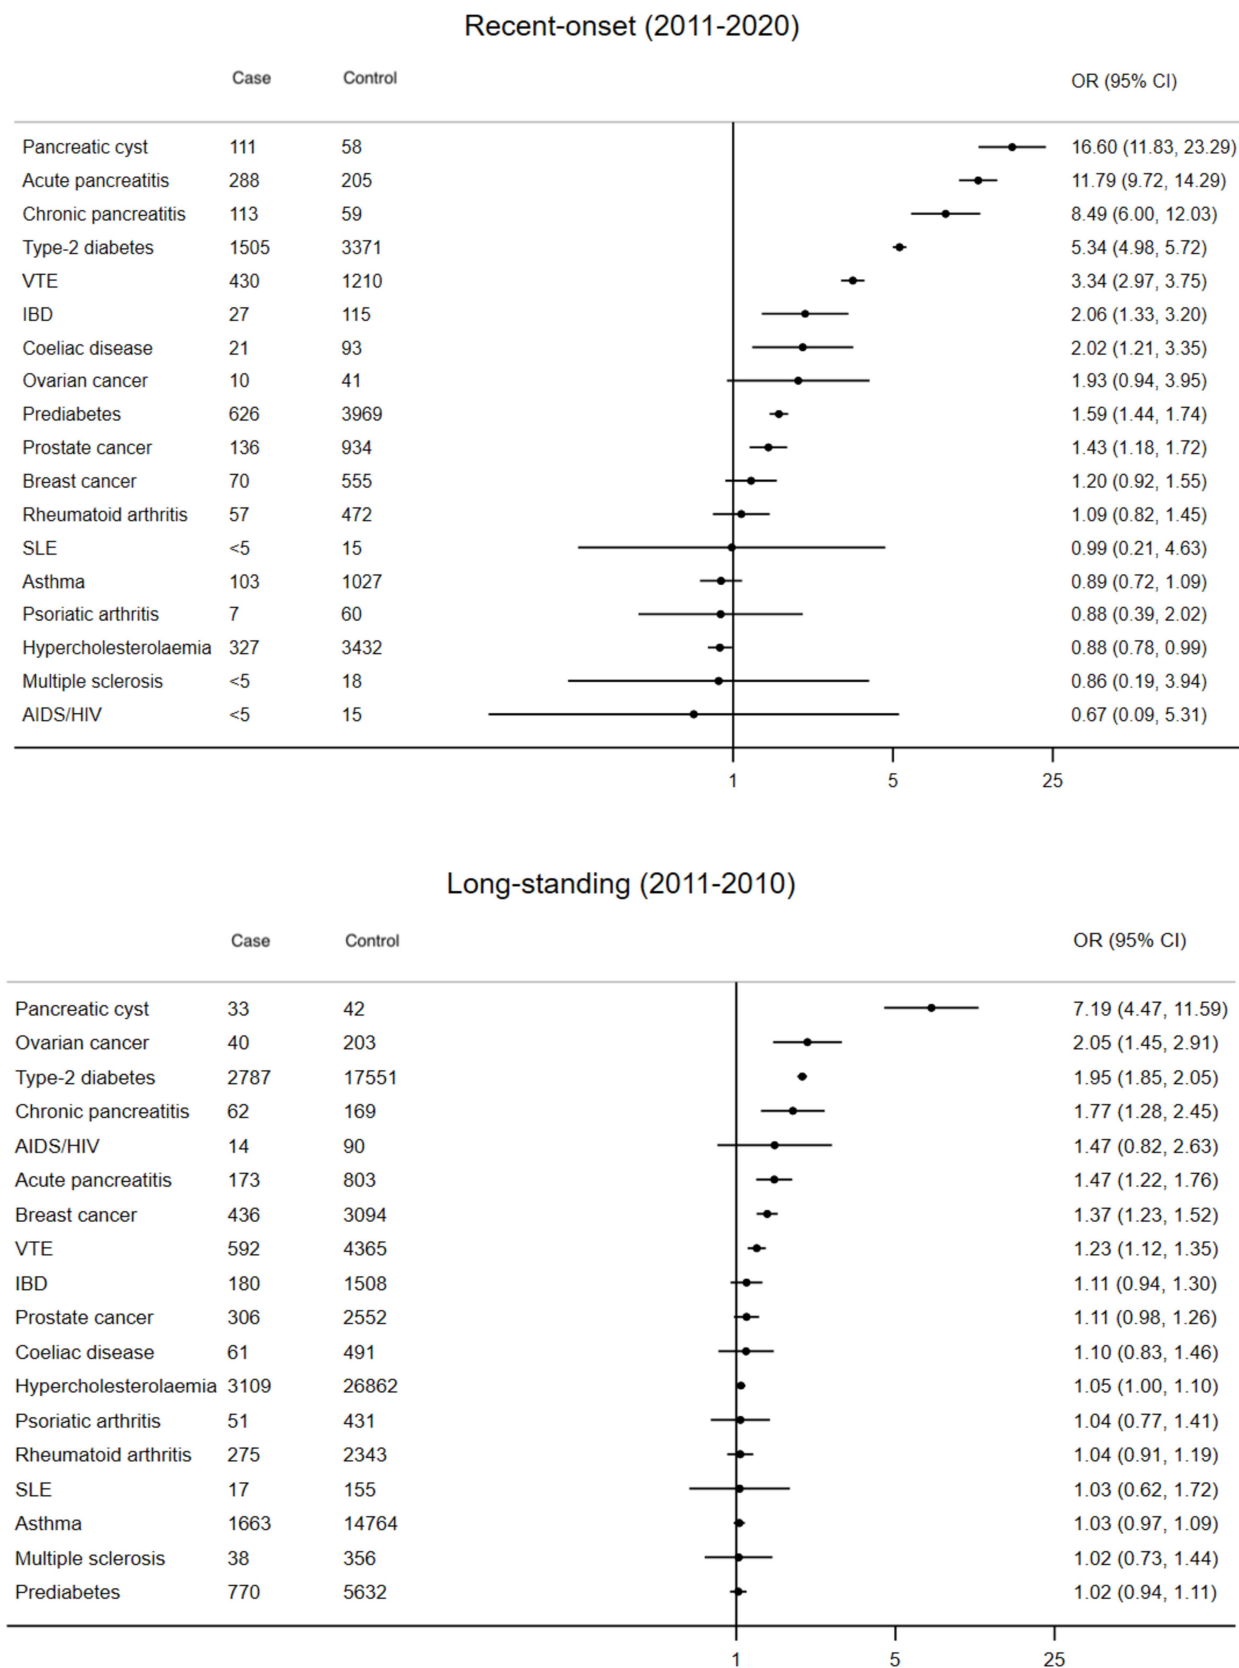

Figure S11 (a): Subgroup analysis by age - association of medications and risk of PDAC in age &lt; 60 at index date

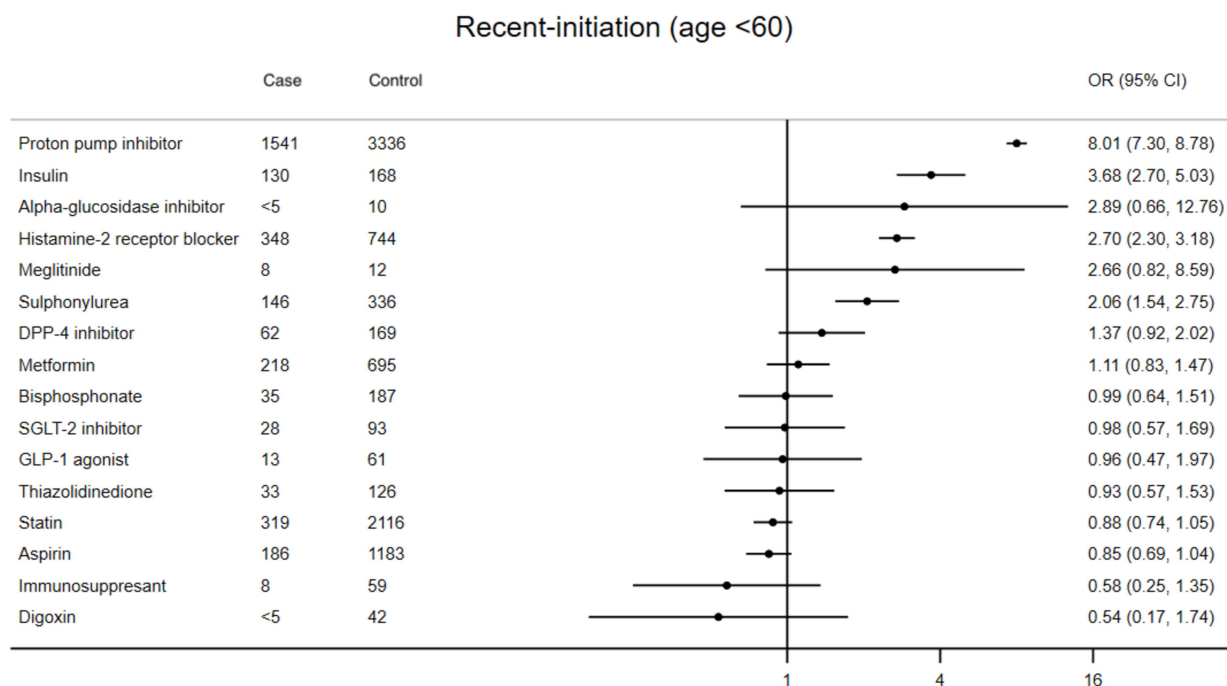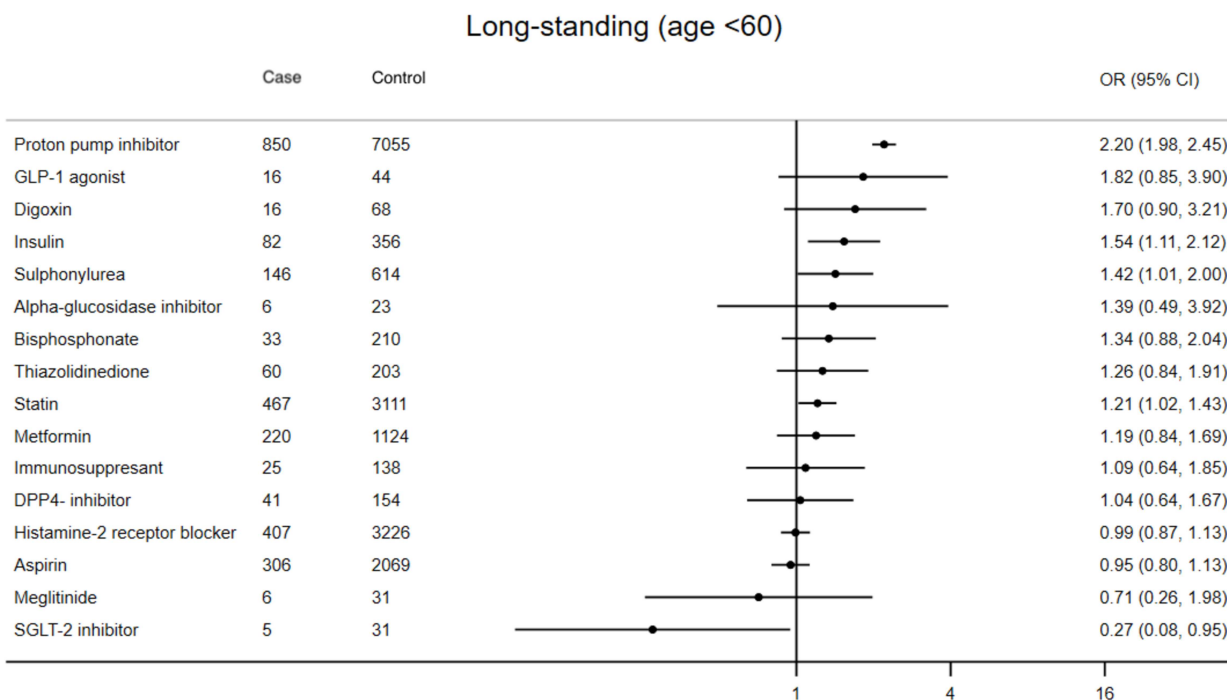



Figure S11 (b): Subgroup analysis by age - association of medications and risk of PDAC in age  $\geq 60$  at index date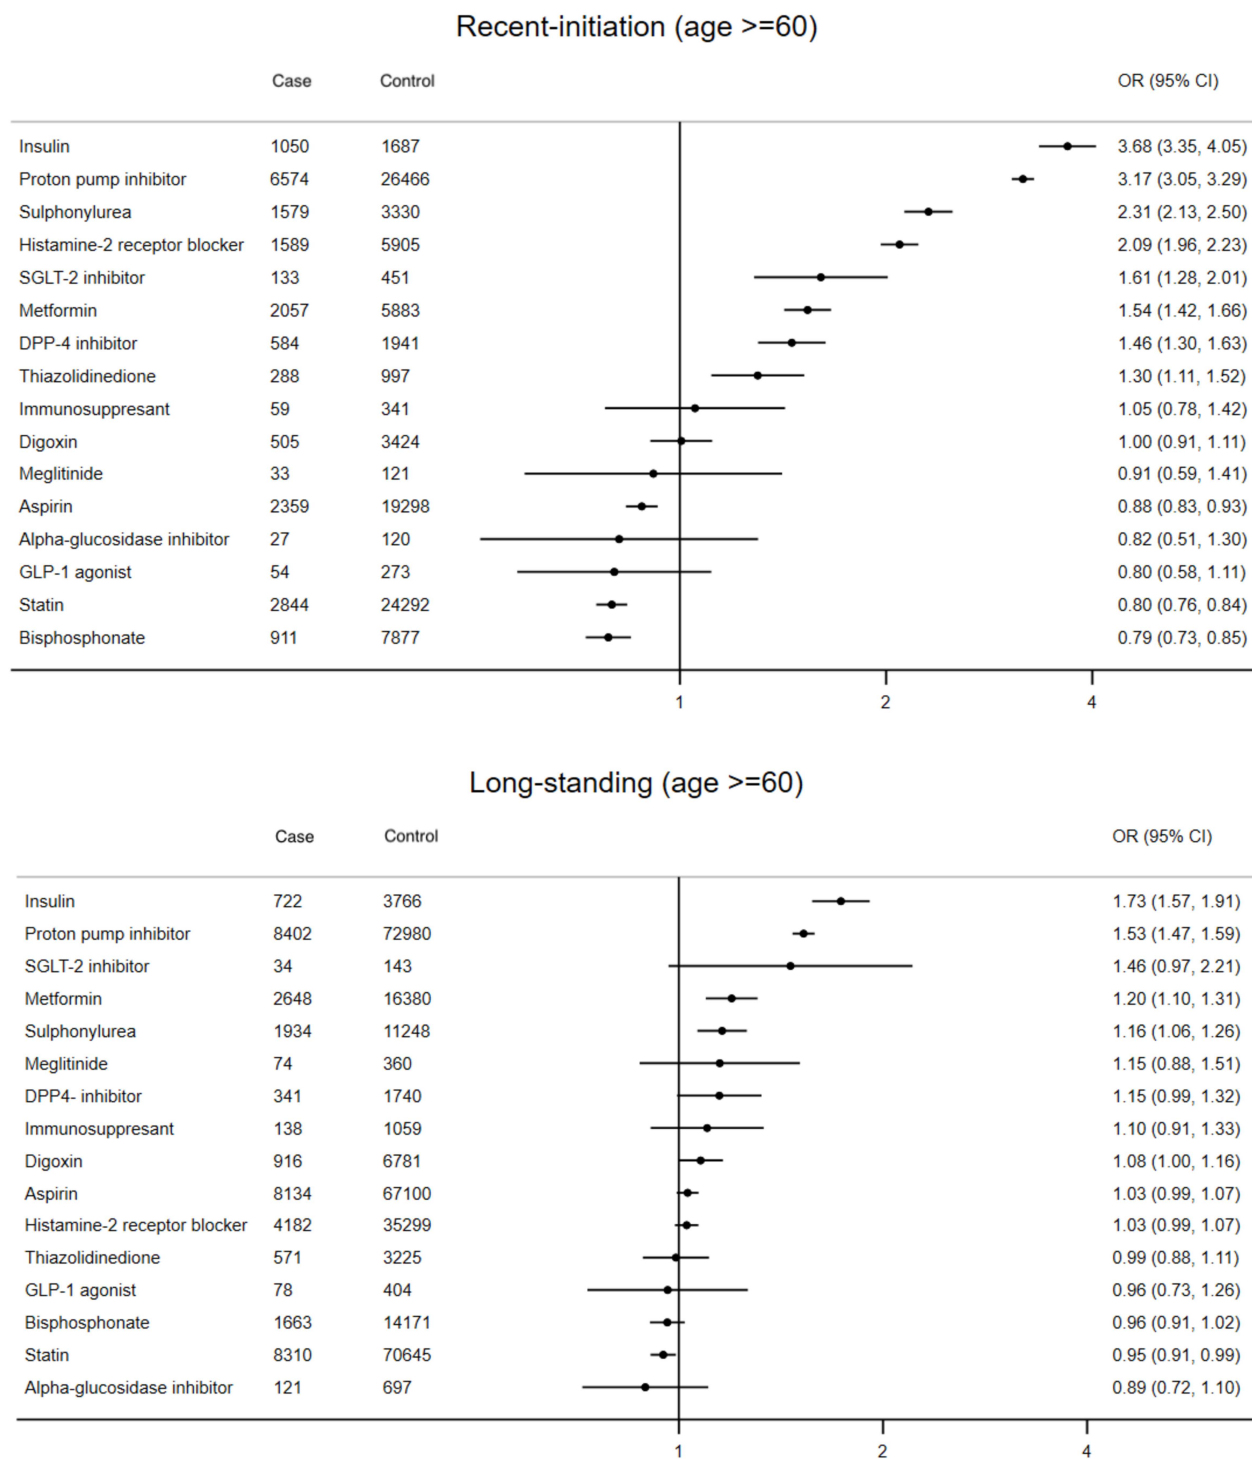

Figure S12 (a): Subgroup analysis by sex - association of medications and risk of PDAC in female

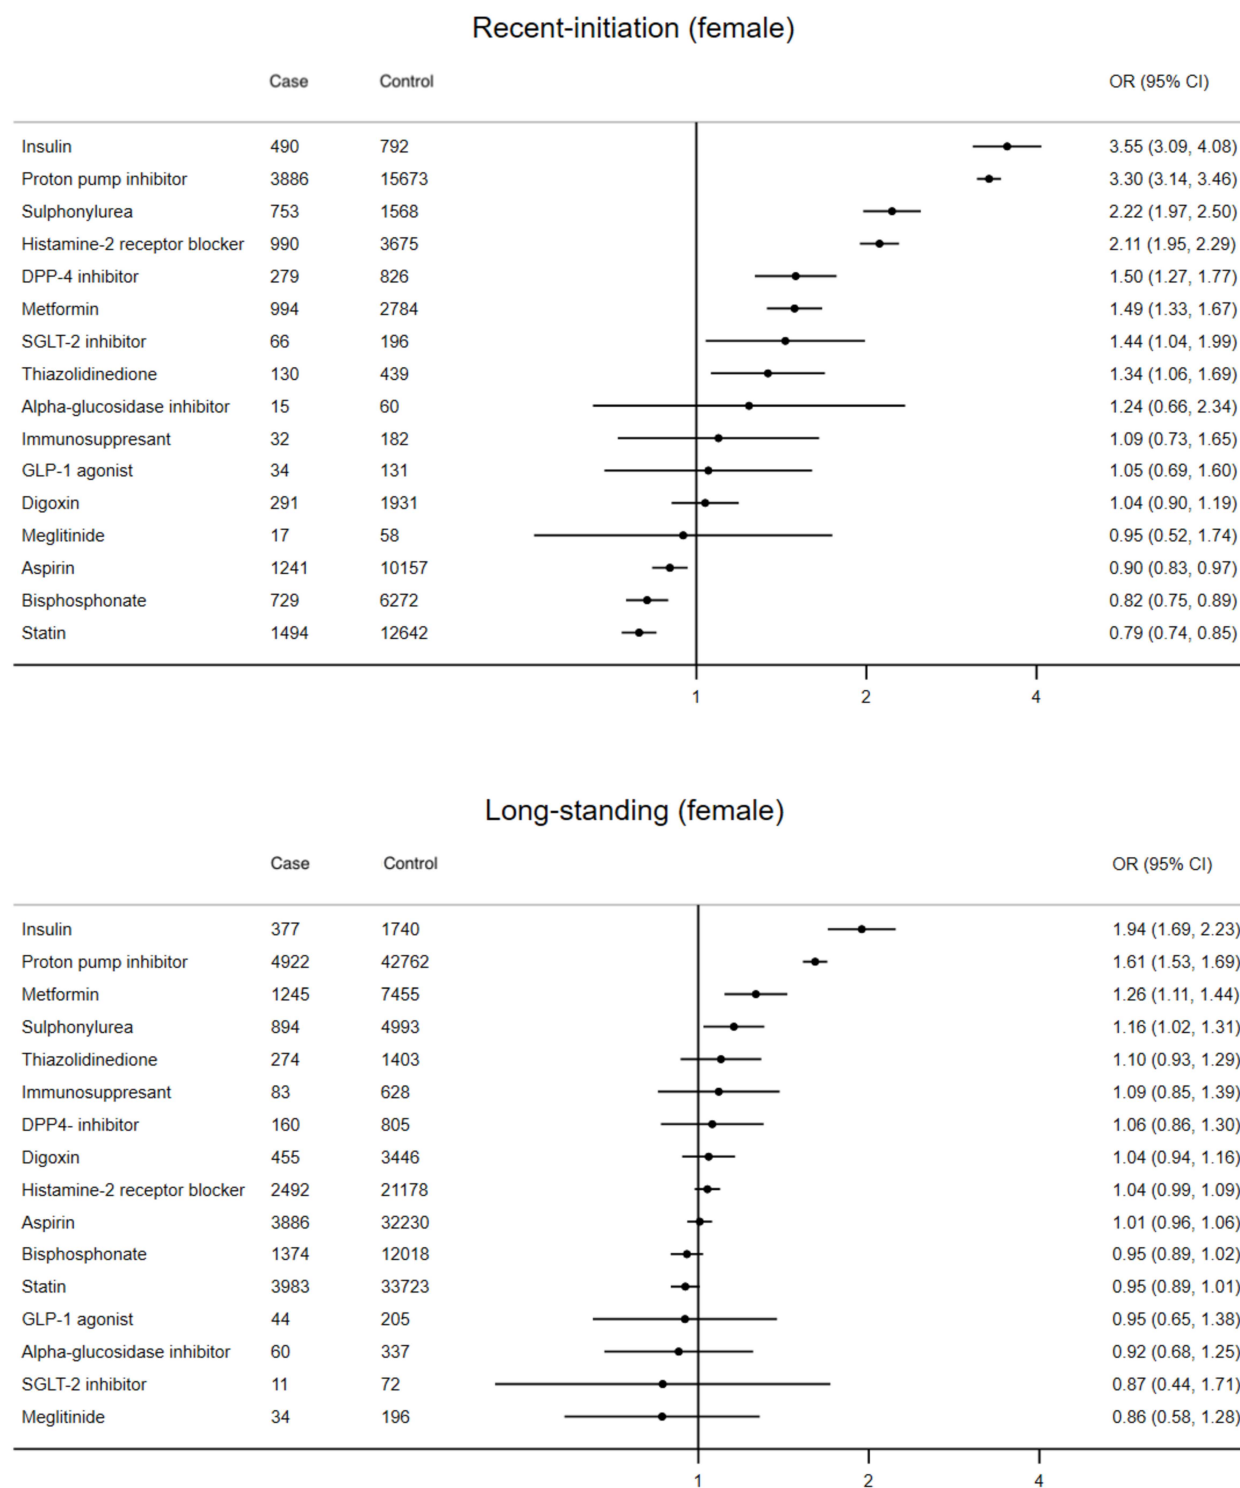



Figure S12 (b): Subgroup analysis by sex - association of medications and risk of PDAC in male

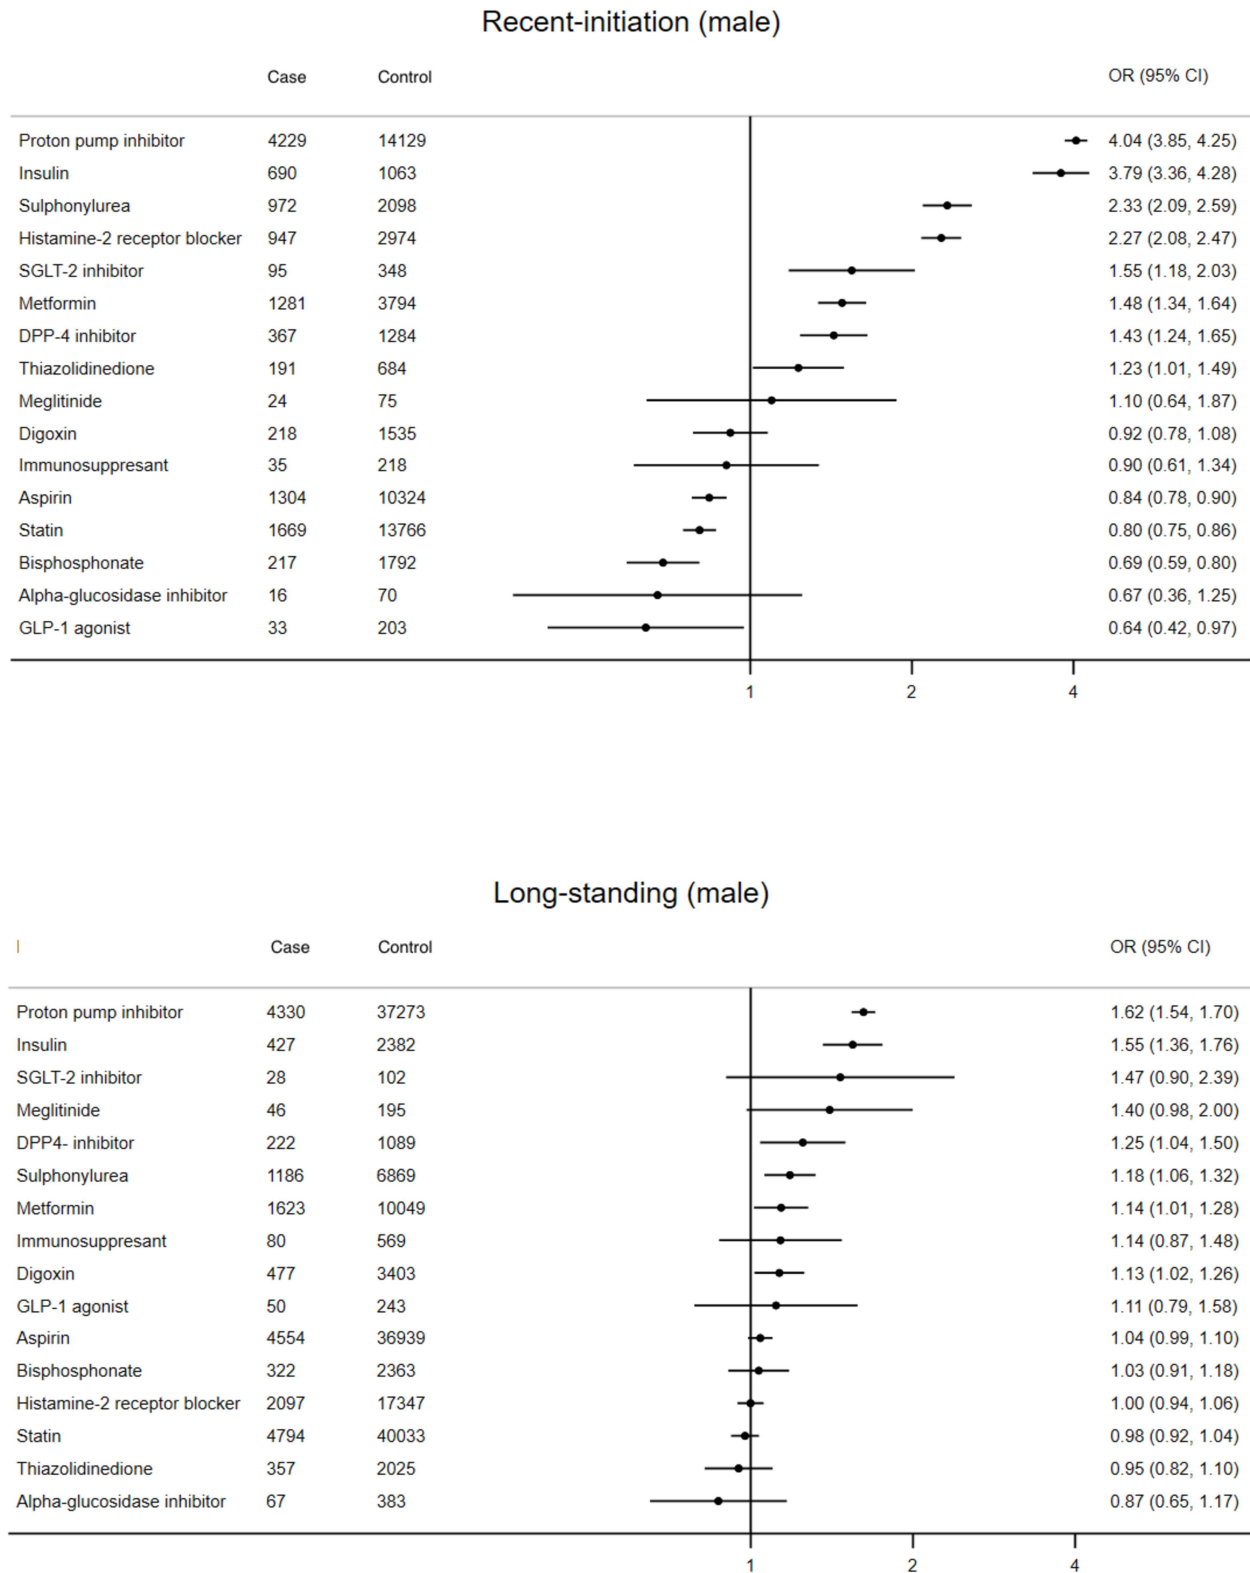

Figure S13 (a): Subgroup analysis year of diagnosis - association of medications and risk of PDAC in diagnosis year 2000-2010 (or matching year in controls)

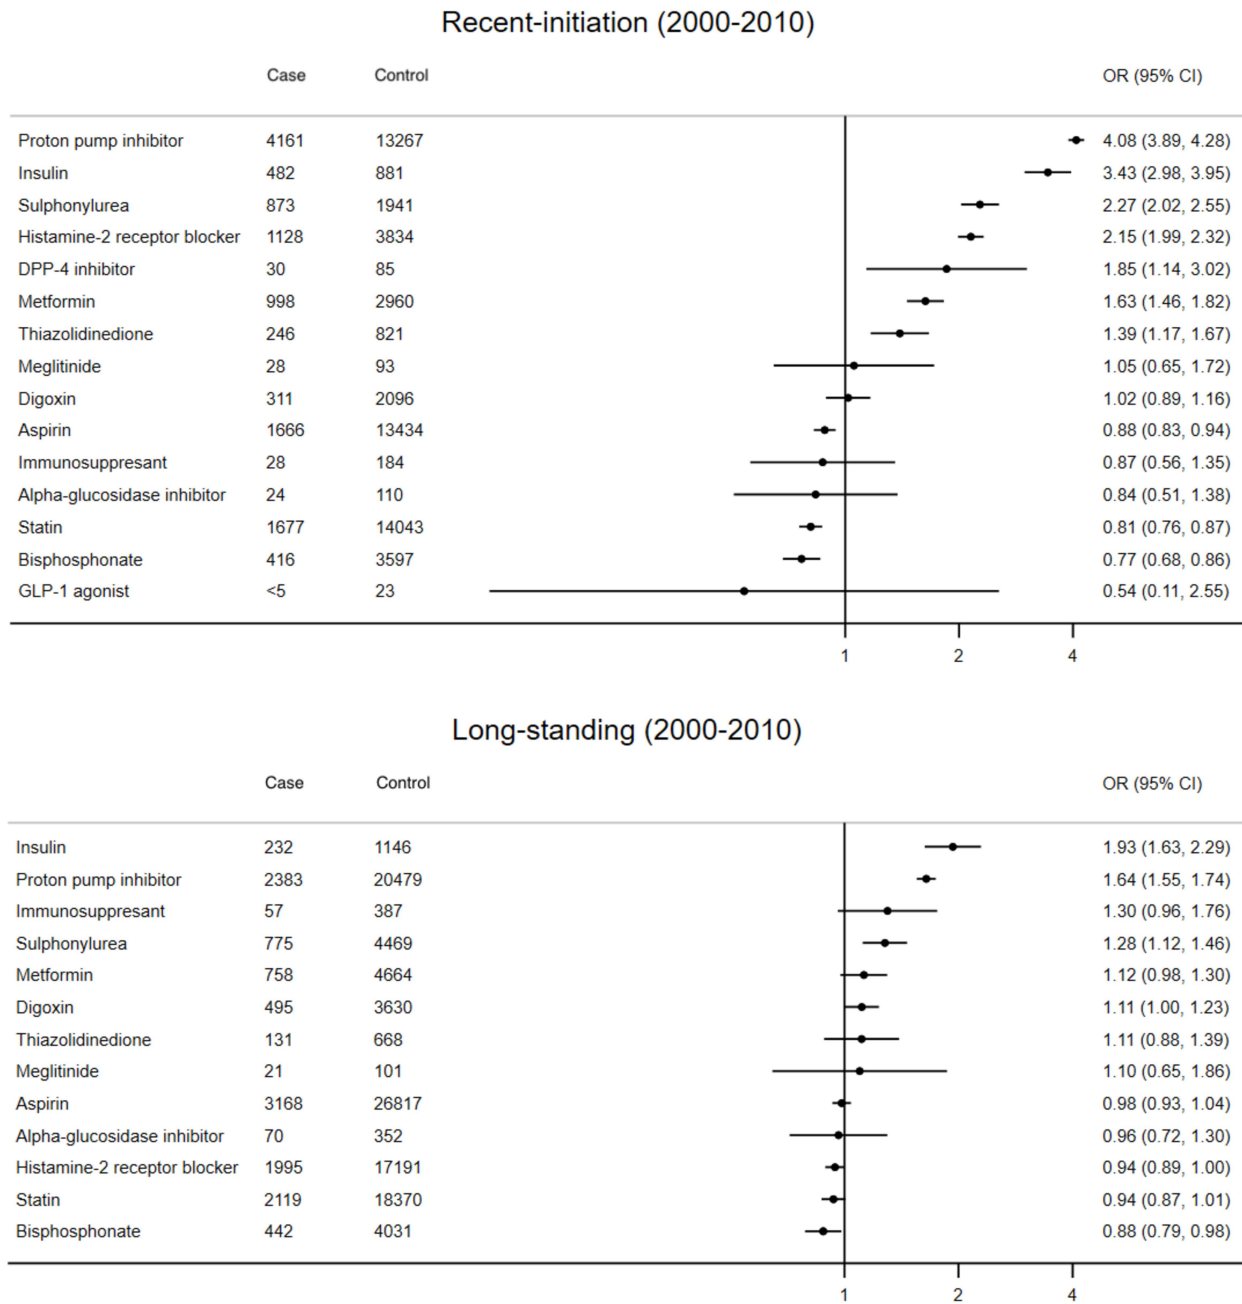

Figure S13 (b): Subgroup analysis year of diagnosis - association of medications and risk of PDAC in diagnosis year 2011-2020 (or matching year in controls)

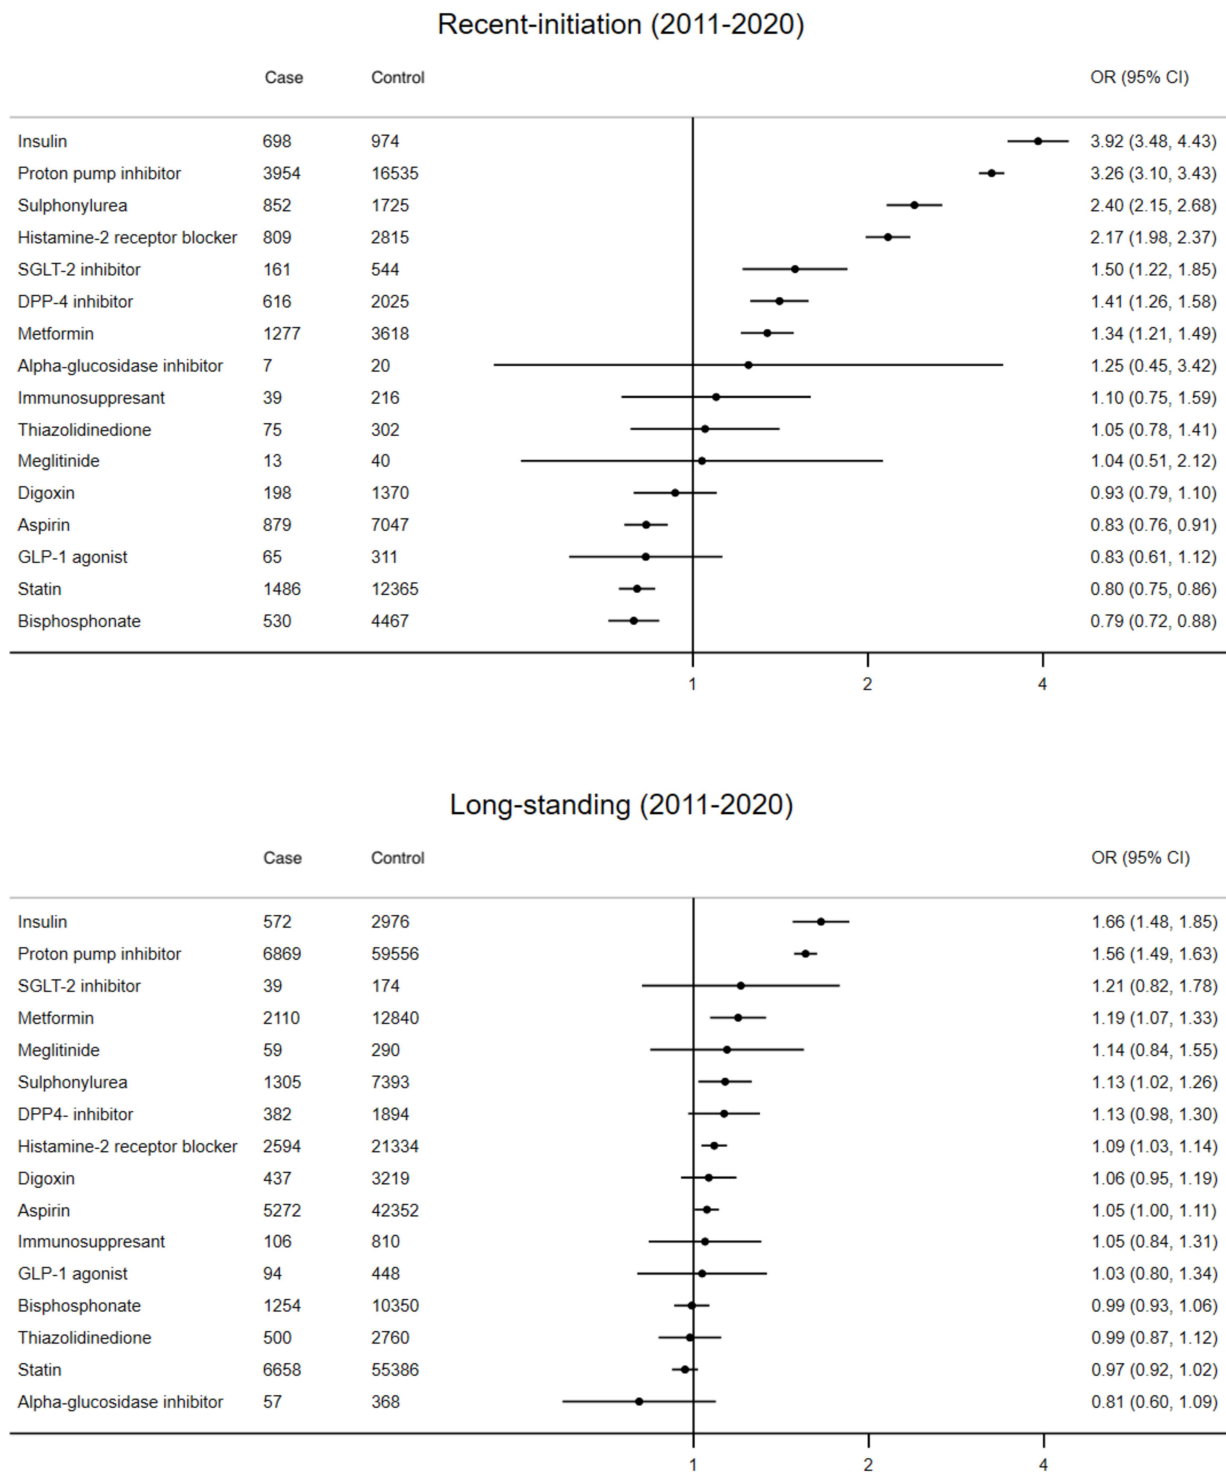

Figure S14 (a): Subgroup analysis by body mass index (BMI) - association of comorbidities and risk of PDAC in individuals with BMI <25kg/m<sup>2</sup> \*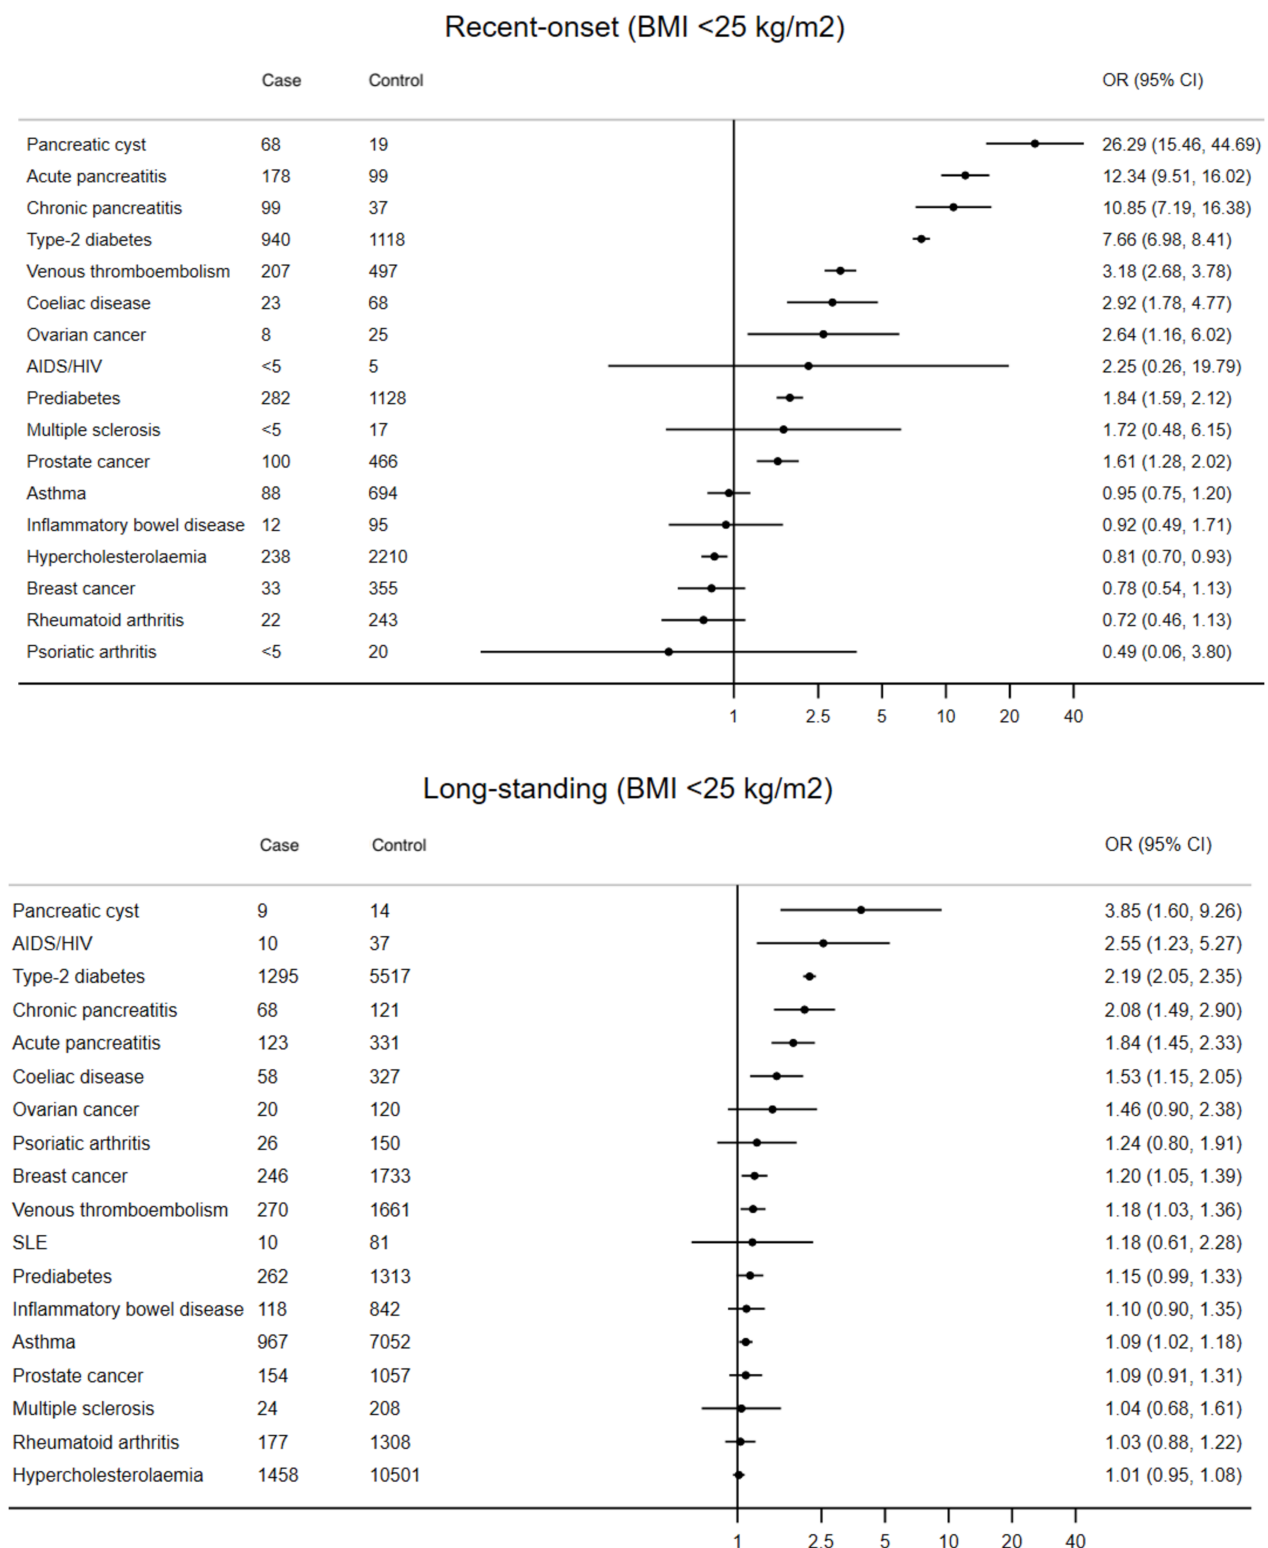

\* Subgrouping variables were not matching factors in the case-control study design, hence, these subgroup analysis were performed without matching but instead analysed using mixed effects logistic regression using practice as a random-effect variable and additionally adjusted for other matching factors (age, sex, year of diagnosis).

Figure S14 (b): Subgroup analysis by body mass index (BMI) - association of comorbidities and risk of PDAC in individuals with BMI  $\geq 25 \text{ kg/m}^2$ \*

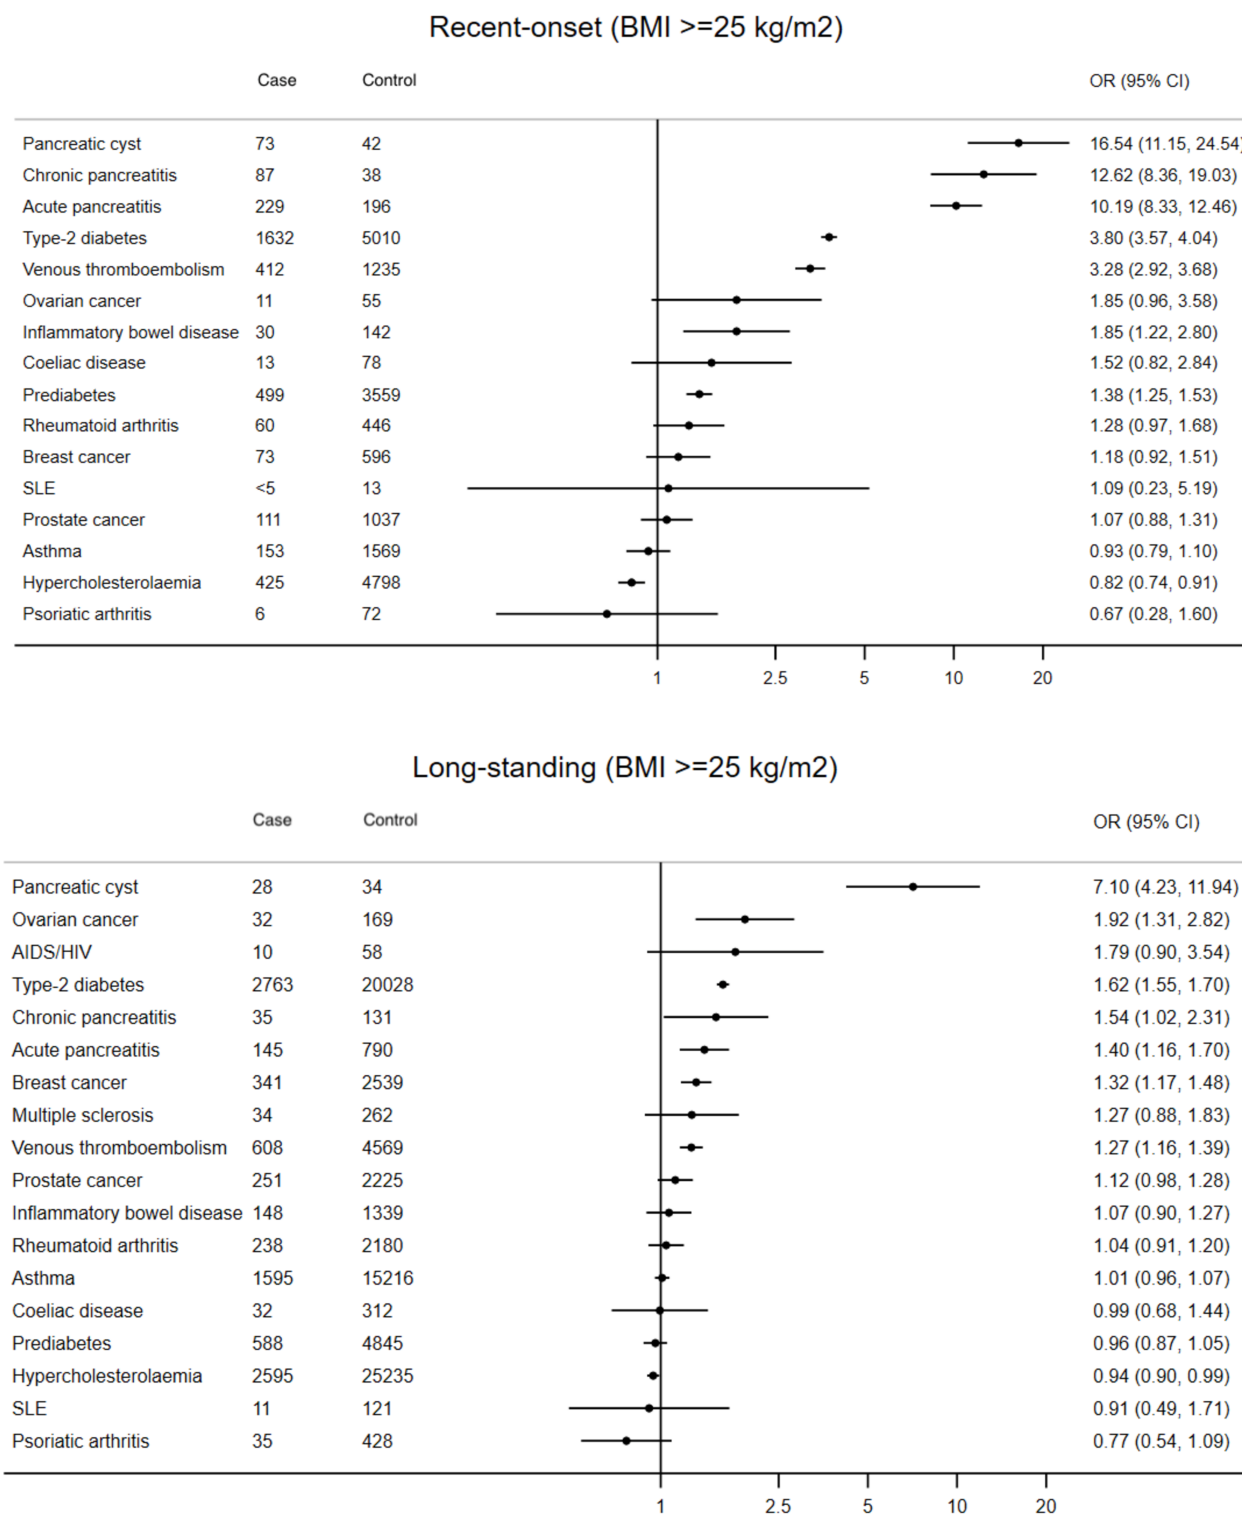

\* Subgrouping variables were not matching factors in the case-control study design, hence, these subgroup analysis were performed without matching but instead analysed using mixed effects logistic regression using practice as a random-effect variable and additionally adjusted for other matching factors (age, sex, year of diagnosis).

Figure S15 (a): Subgroup analysis by smoking status - association of comorbidities and risk of PDAC in never smokers\*

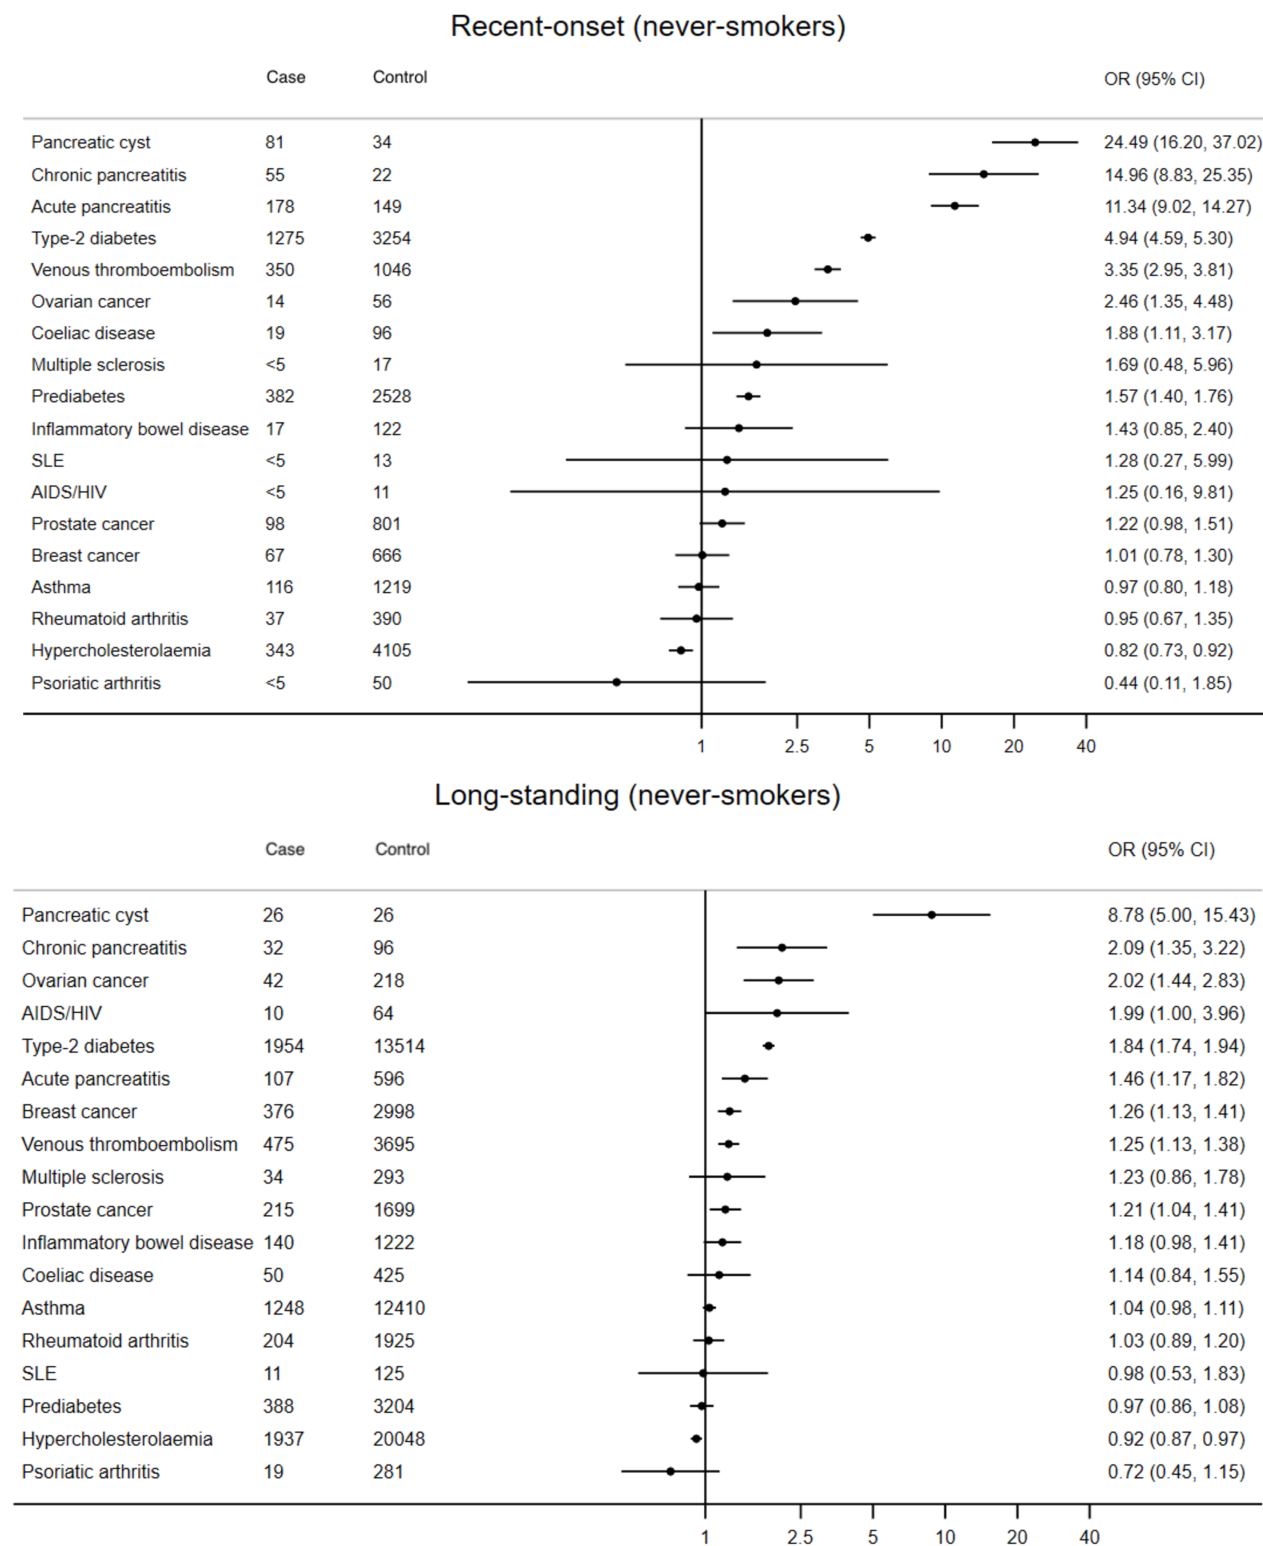

\* Subgrouping variables were not matching factors in the case-control study design, hence, these subgroup analysis were performed without matching but instead analysed using mixed effects logistic regression using practice as a random-effect variable and additionally adjusted for other matching factors (age, sex, year of diagnosis).



Figure S15 (b): Subgroup analysis by smoking status - association of comorbidities and risk of PDAC in ever smokers (ex and current smokers)\*

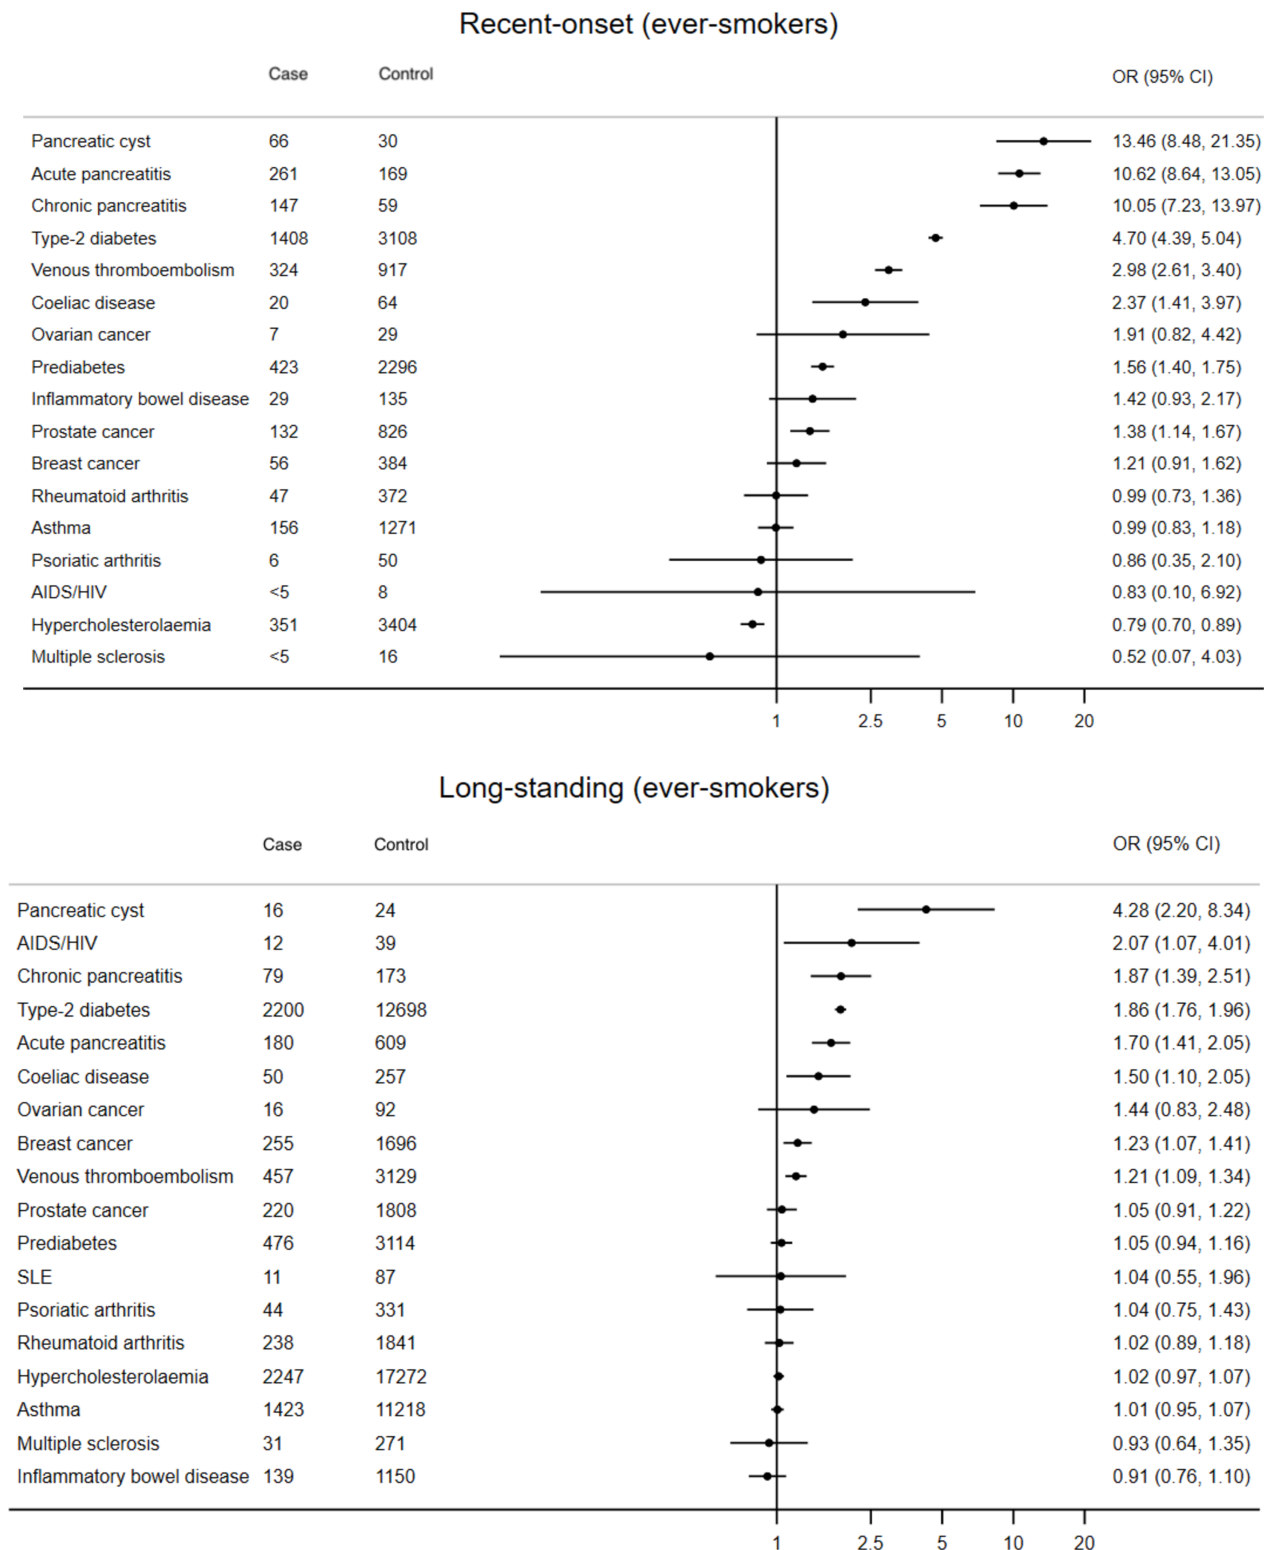

\* Subgrouping variables were not matching factors in the case-control study design, hence, these subgroup analysis were performed without matching but instead analysed using mixed effects logistic regression using practice as a random-effect variable and additionally adjusted for other matching factors (age, sex, year of diagnosis).

Figure S16 (a): Subgroup analysis by type-2 diabetes status - association of comorbidities and risk of PDAC in individuals with type-2 diabetes\*

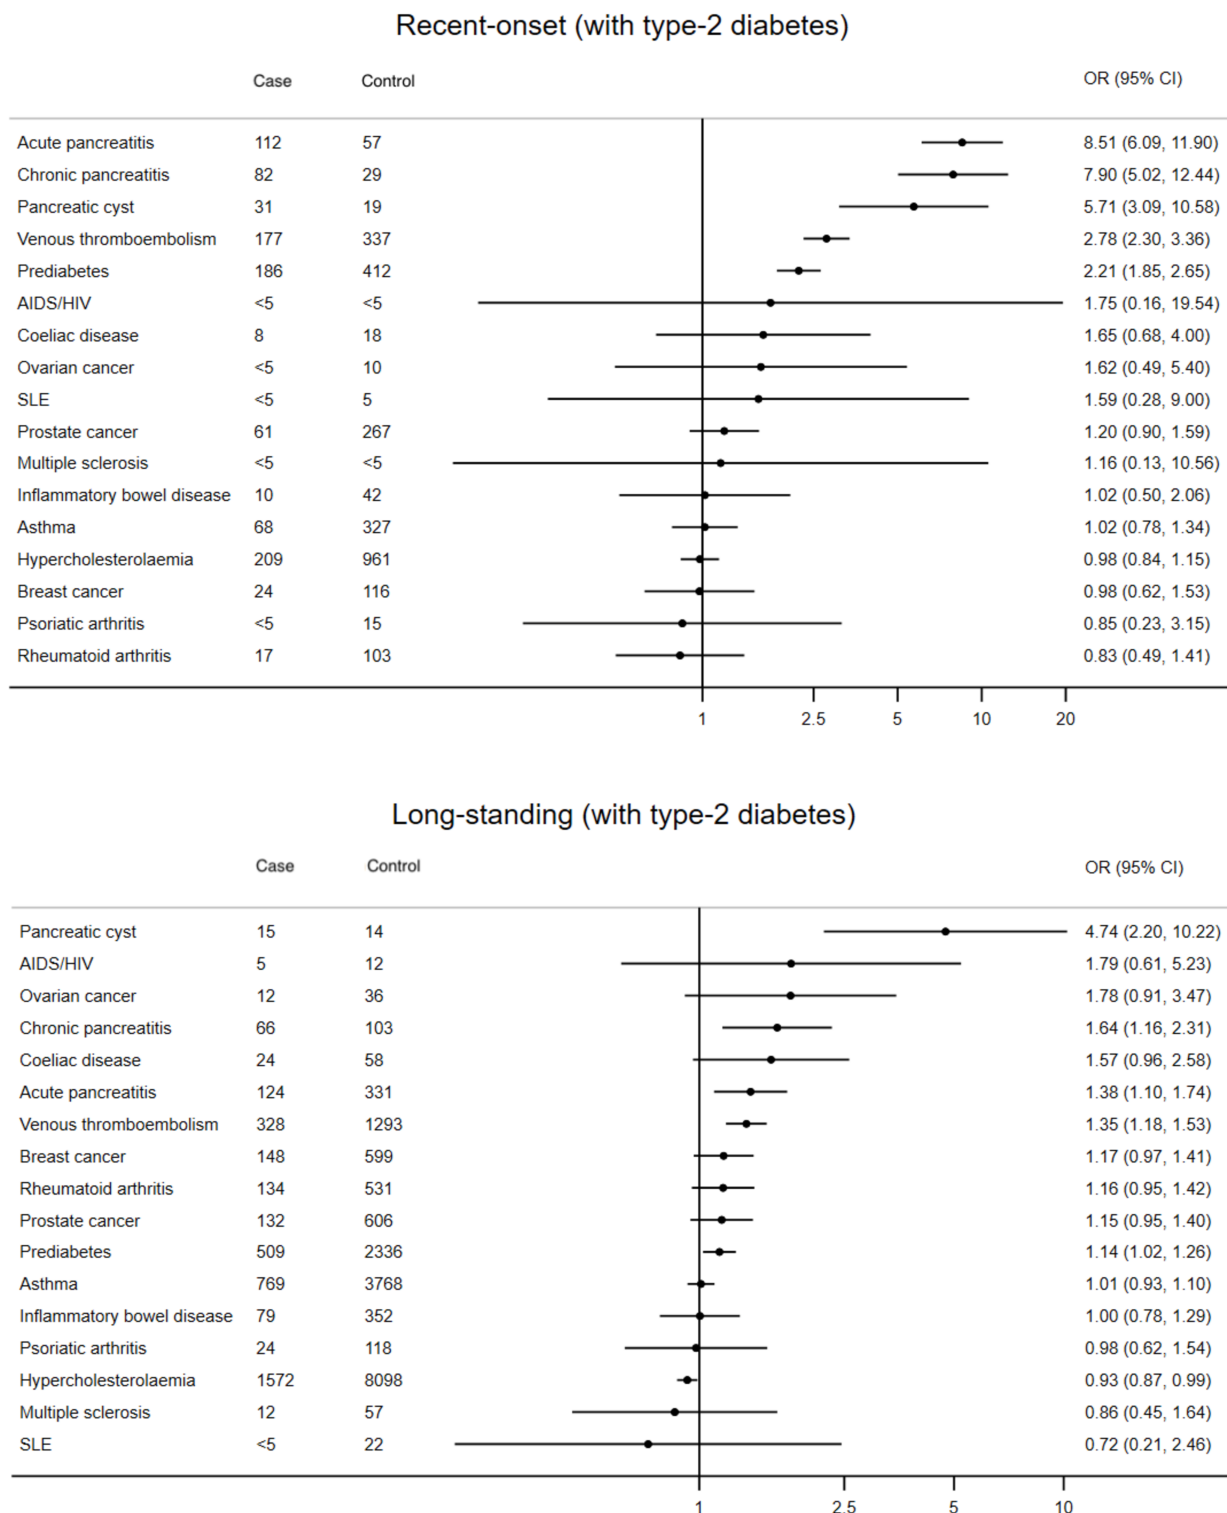

\* Subgrouping variables were not matching factors in the case-control study design, hence, these subgroup analysis were performed without matching but instead analysed using mixed effects logistic regression using practice as a random-effect variable and additionally adjusted for other matching factors (age, sex, year of diagnosis).



Figure S16 (b): Subgroup analysis by type-2 diabetes status - association of comorbidities and risk of PDAC in individuals with no type-2 diabetes\*

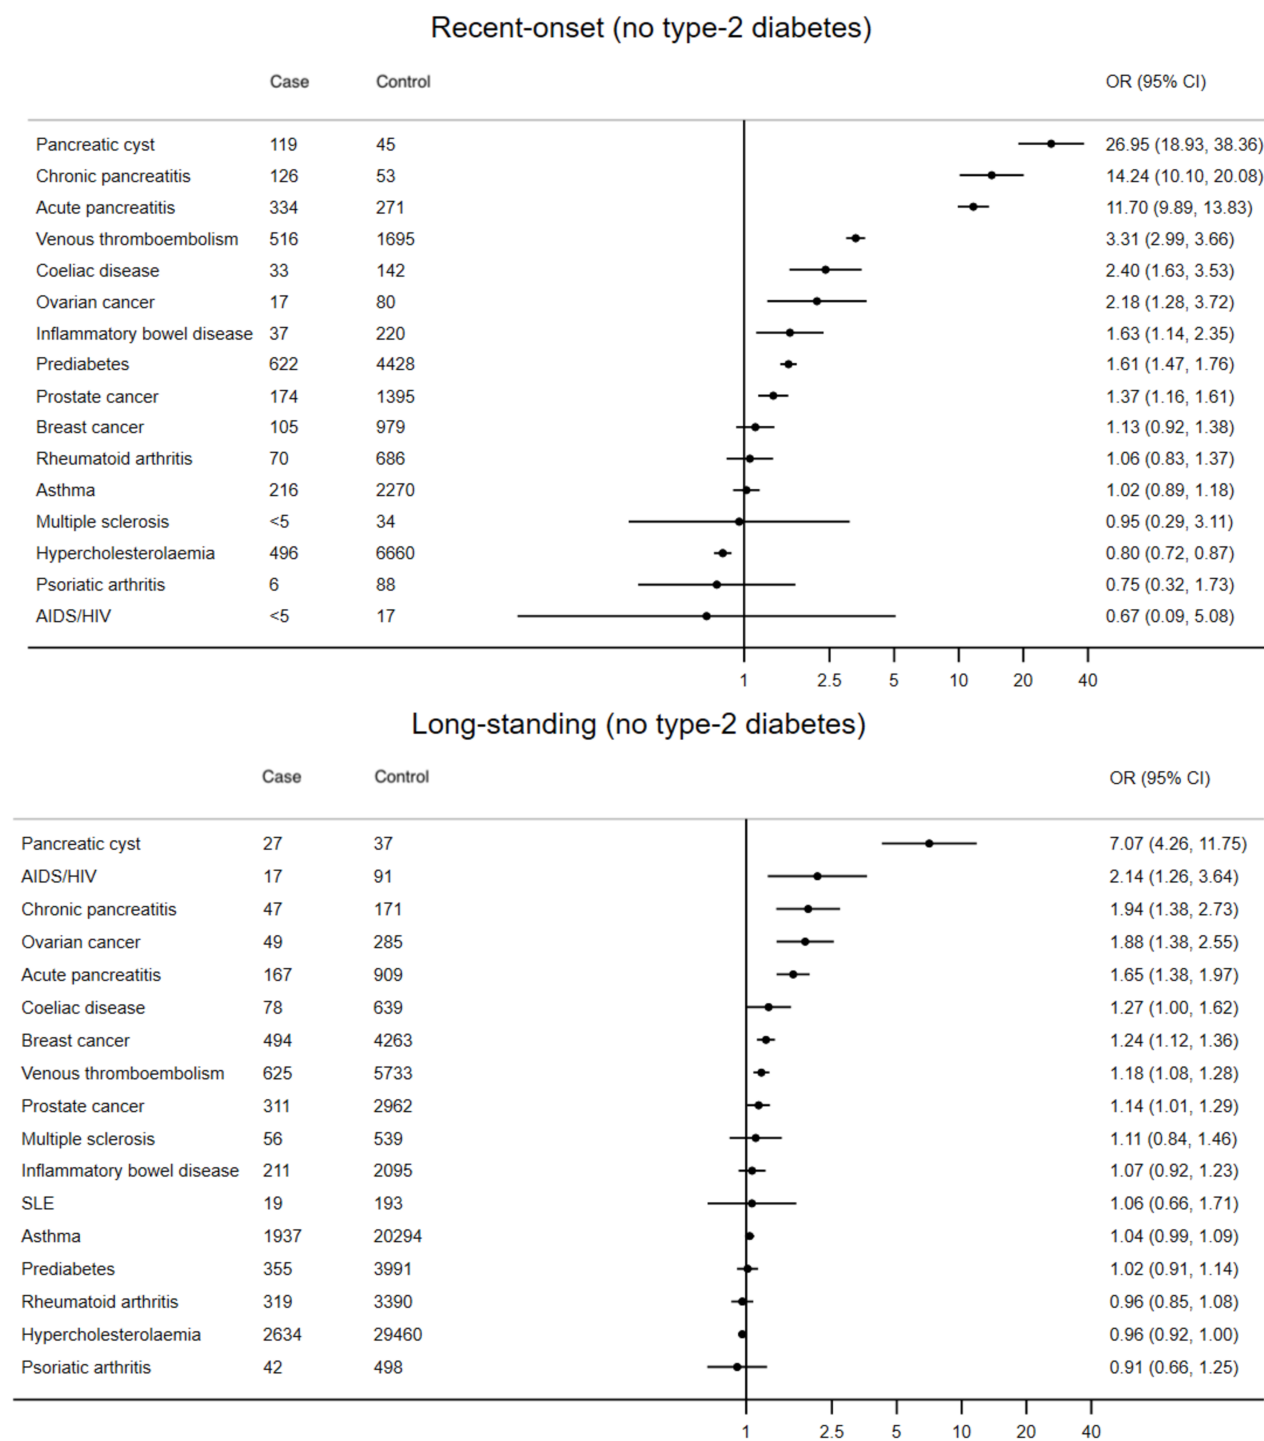

\* Subgrouping variables were not matching factors in the case-control study design, hence, these subgroup analysis were performed without matching but instead analysed using mixed effects logistic regression using practice as a random-effect variable and additionally adjusted for other matching factors (age, sex, year of diagnosis).

Figure S17 (a): Subgroup analysis by body mass index (BMI) - association of medications and risk of PDAC in individuals with BMI <25kg/m<sup>2</sup>\*

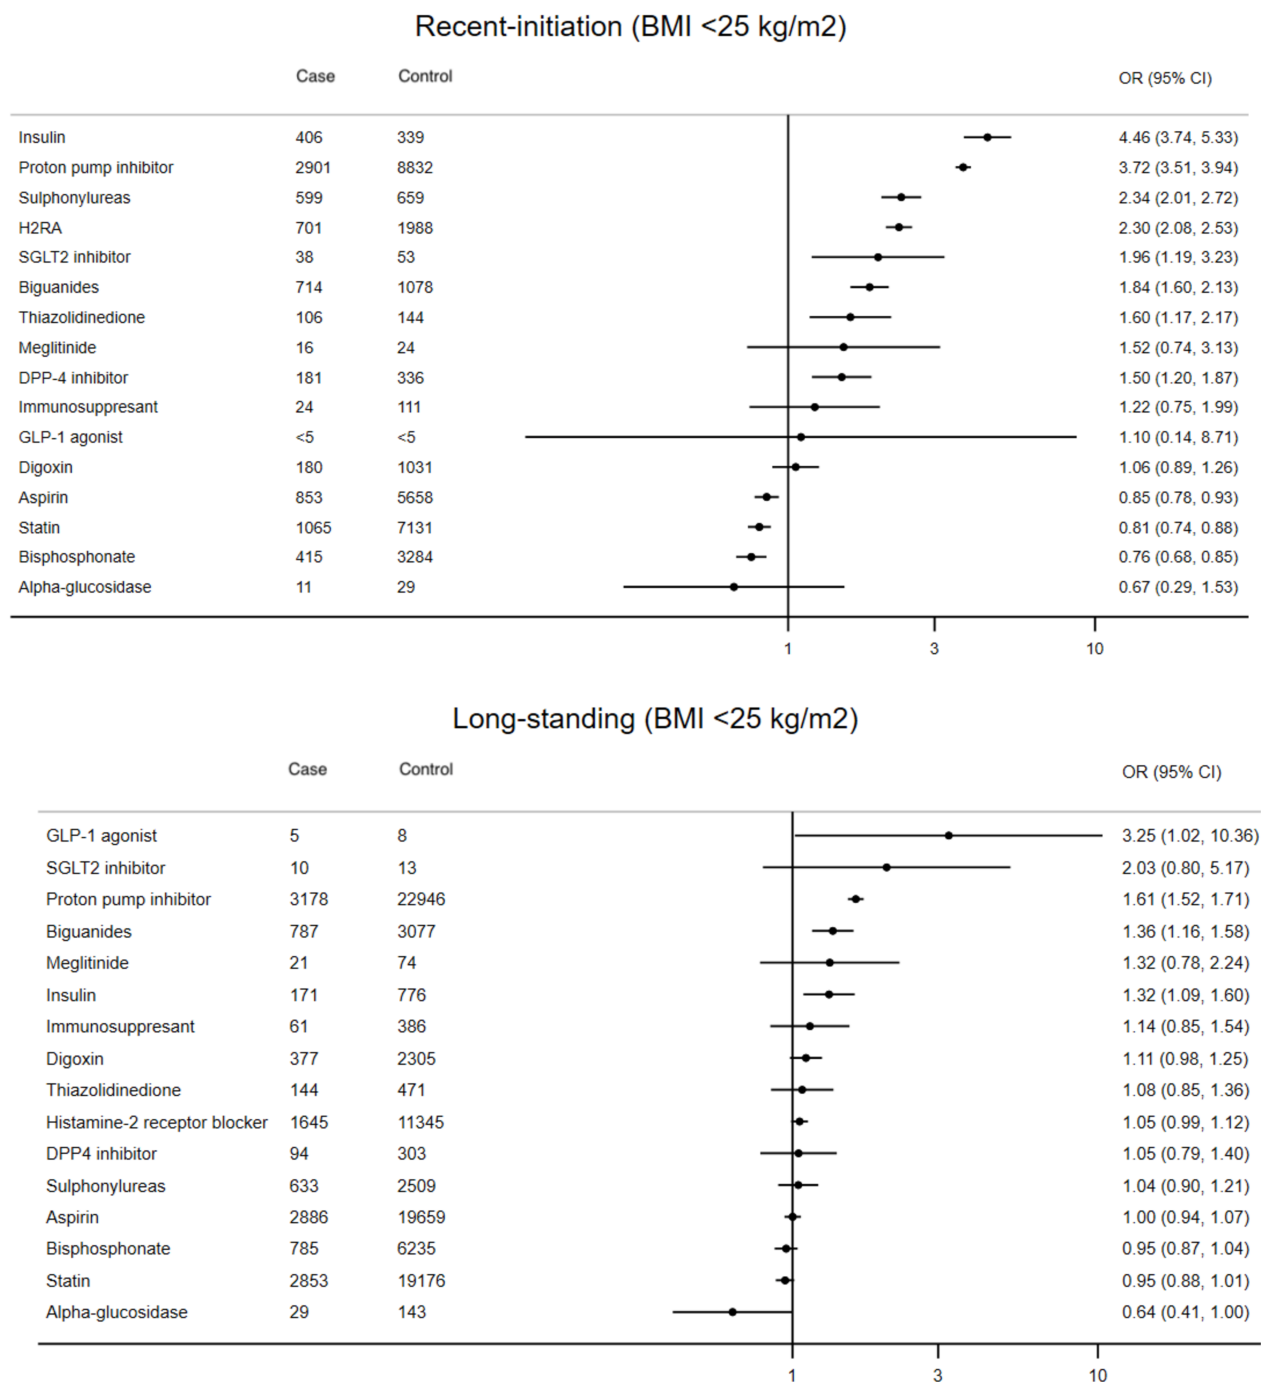

\* Subgrouping variables were not matching factors in the case-control study design, hence, these subgroup analysis were performed without matching but instead analysed using mixed effects logistic regression using practice as a random-effect variable and additionally adjusted for other matching factors (age, sex, year of diagnosis).

Figure S17 (b): Subgroup analysis by body mass index (BMI) - association of medications and risk of PDAC in individuals with BMI  $\geq 25\text{kg/m}^2$ \*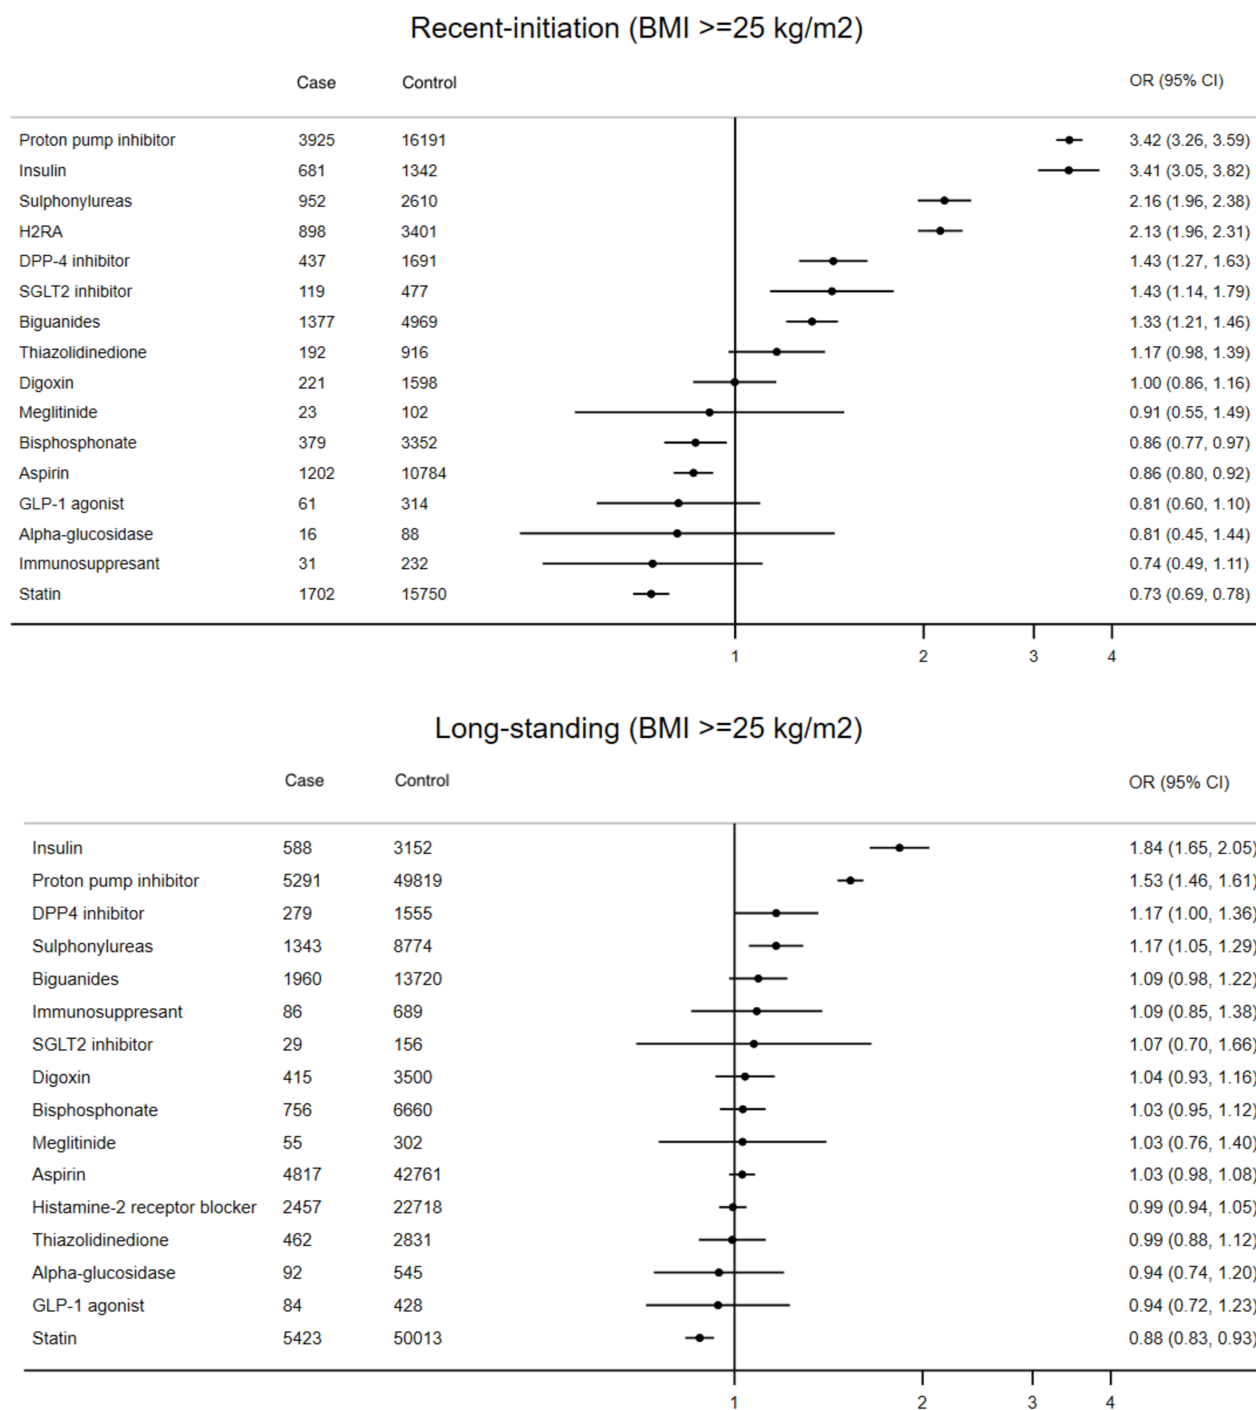

\* Subgrouping variables were not matching factors in the case-control study design, hence, these subgroup analysis were performed without matching but instead analysed using mixed effects logistic regression using practice as a random-effect variable and additionally adjusted for other matching factors (age, sex, year of diagnosis).

Figure S18 (a): Subgroup analysis by smoking status - association of medications and risk of PDAC in never smokers\*

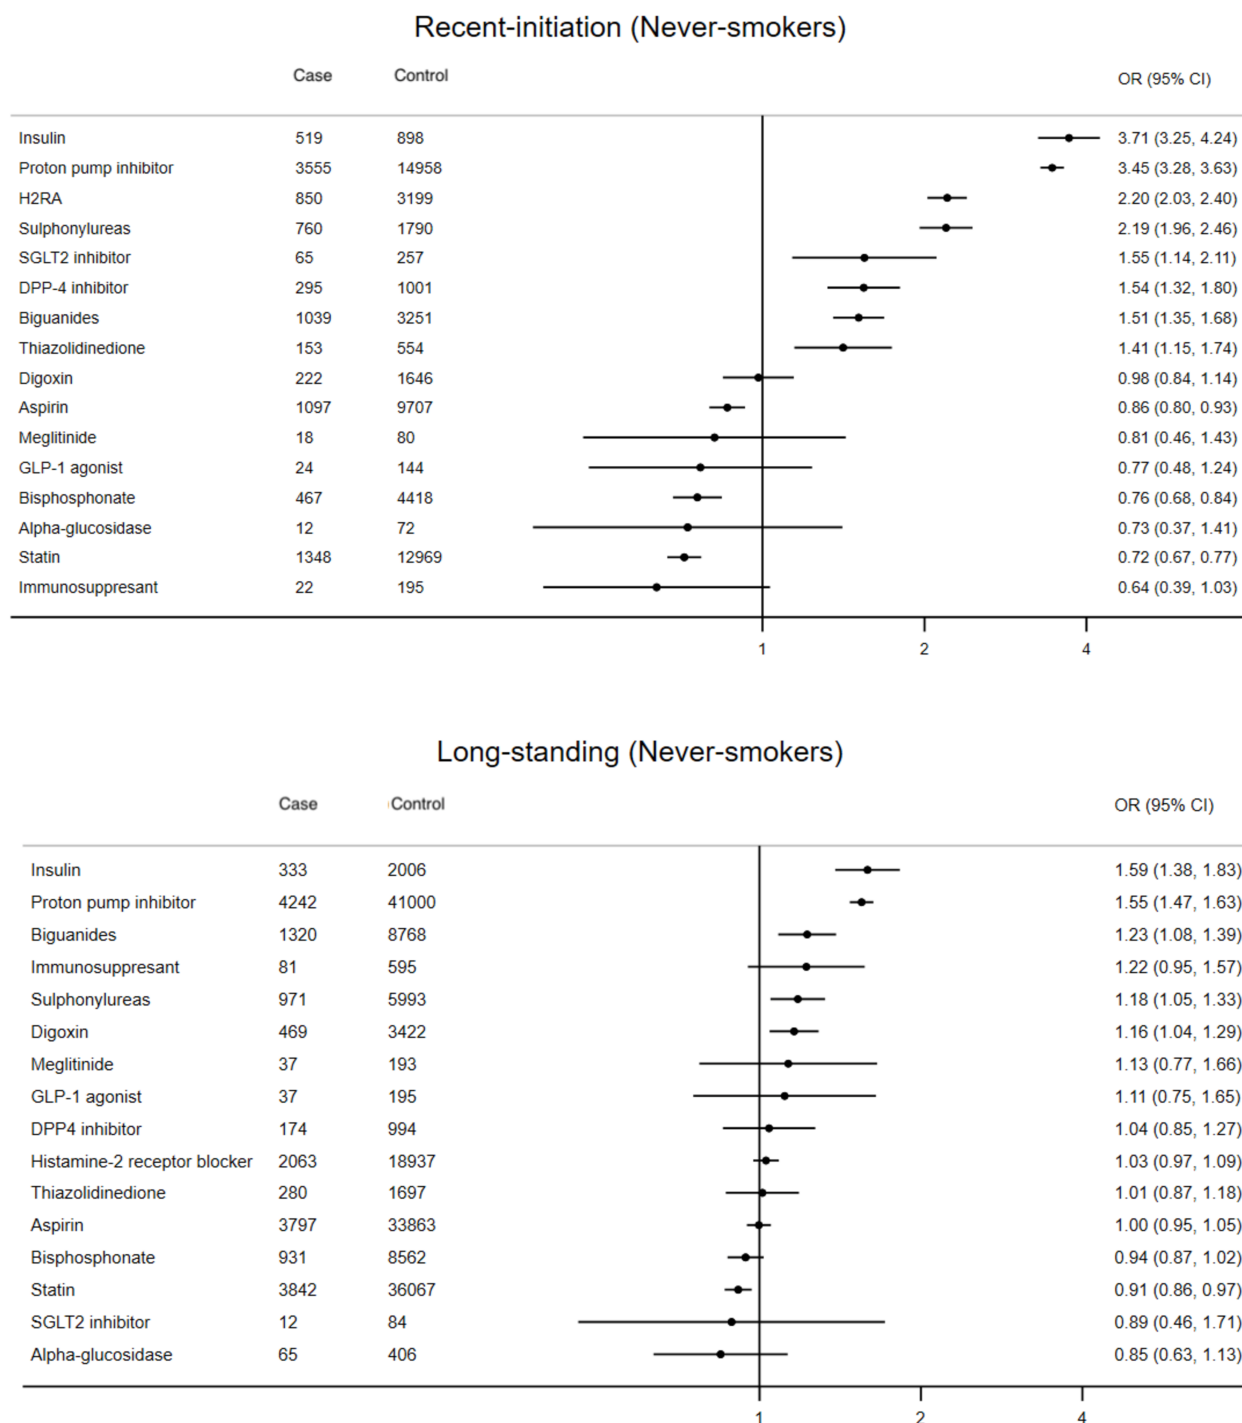

\* Subgrouping variables were not matching factors in the case-control study design, hence, these subgroup analysis were performed without matching but instead analysed using mixed effects logistic regression using practice as a random-effect variable and additionally adjusted for other matching factors (age, sex, year of diagnosis).

Figure S18 (b): Subgroup analysis by smoking status - association of medications and risk of PDAC in ever smokers (ex and current smokers)\*

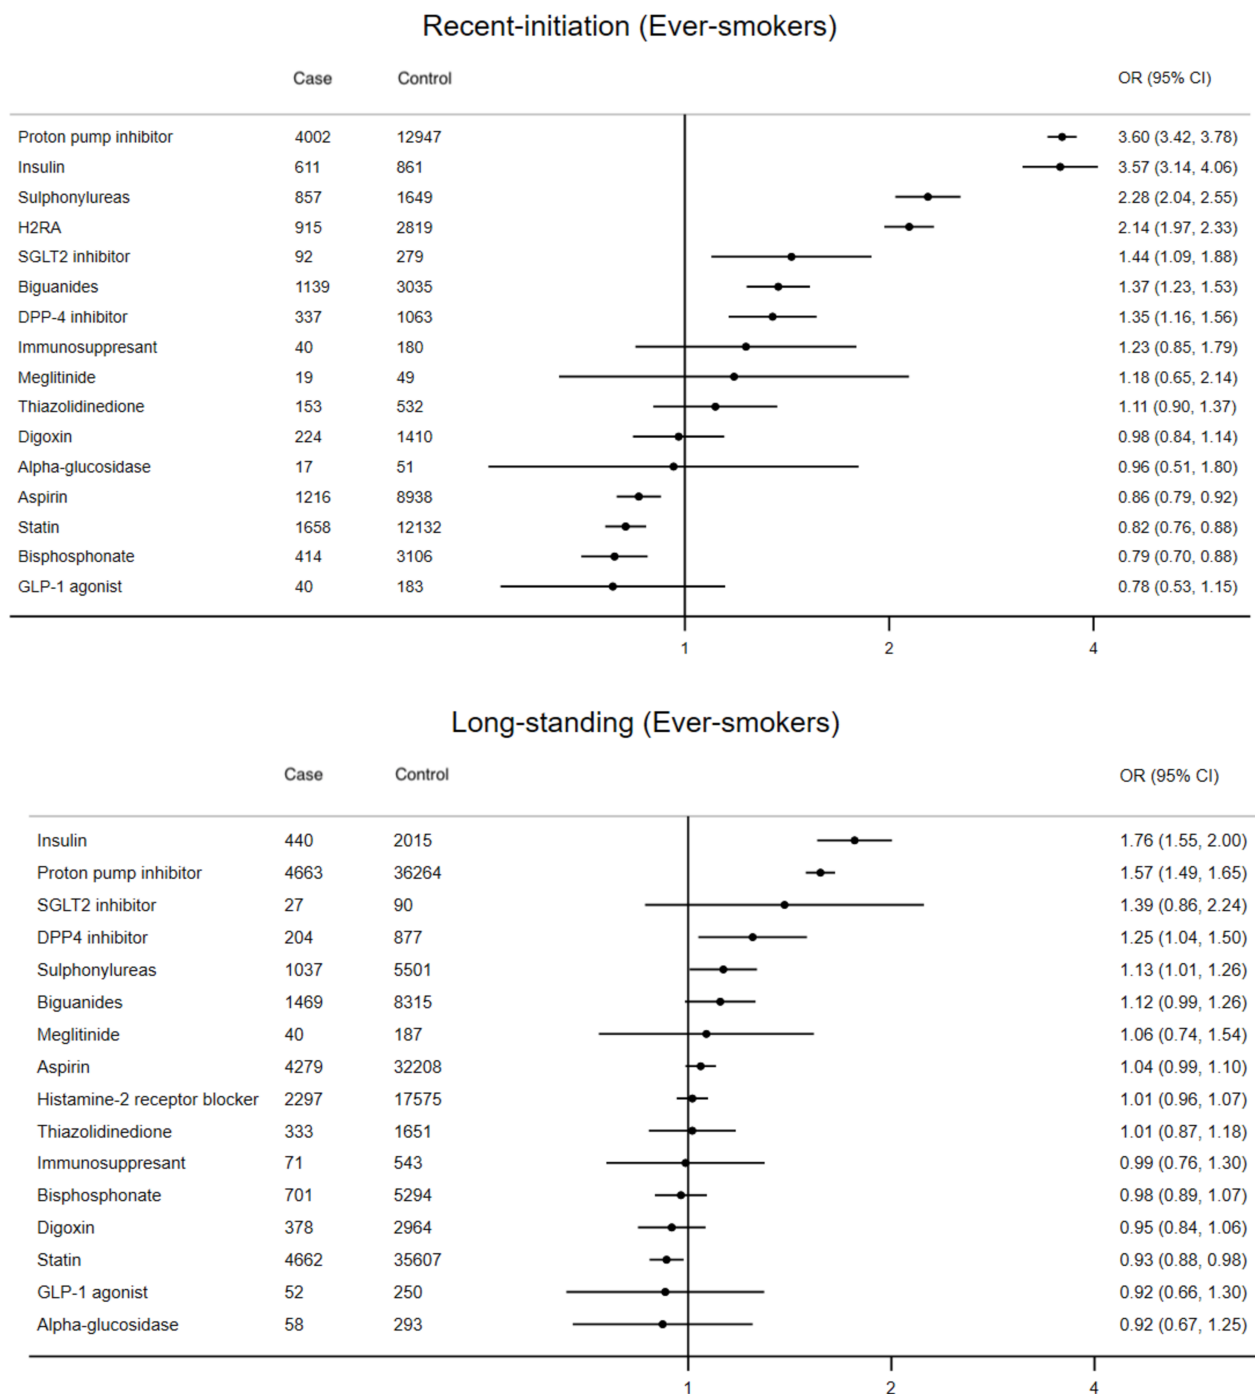

\* Subgrouping variables were not matching factors in the case-control study design, hence, these subgroup analysis were performed without matching but instead analysed using mixed effects logistic regression using practice as a random-effect variable and additionally adjusted for other matching factors (age, sex, year of diagnosis).

Figure S19 (a): Subgroup analysis by type-2 diabetes status - association of medications and risk of PDAC in individuals with type-2 diabetes\*

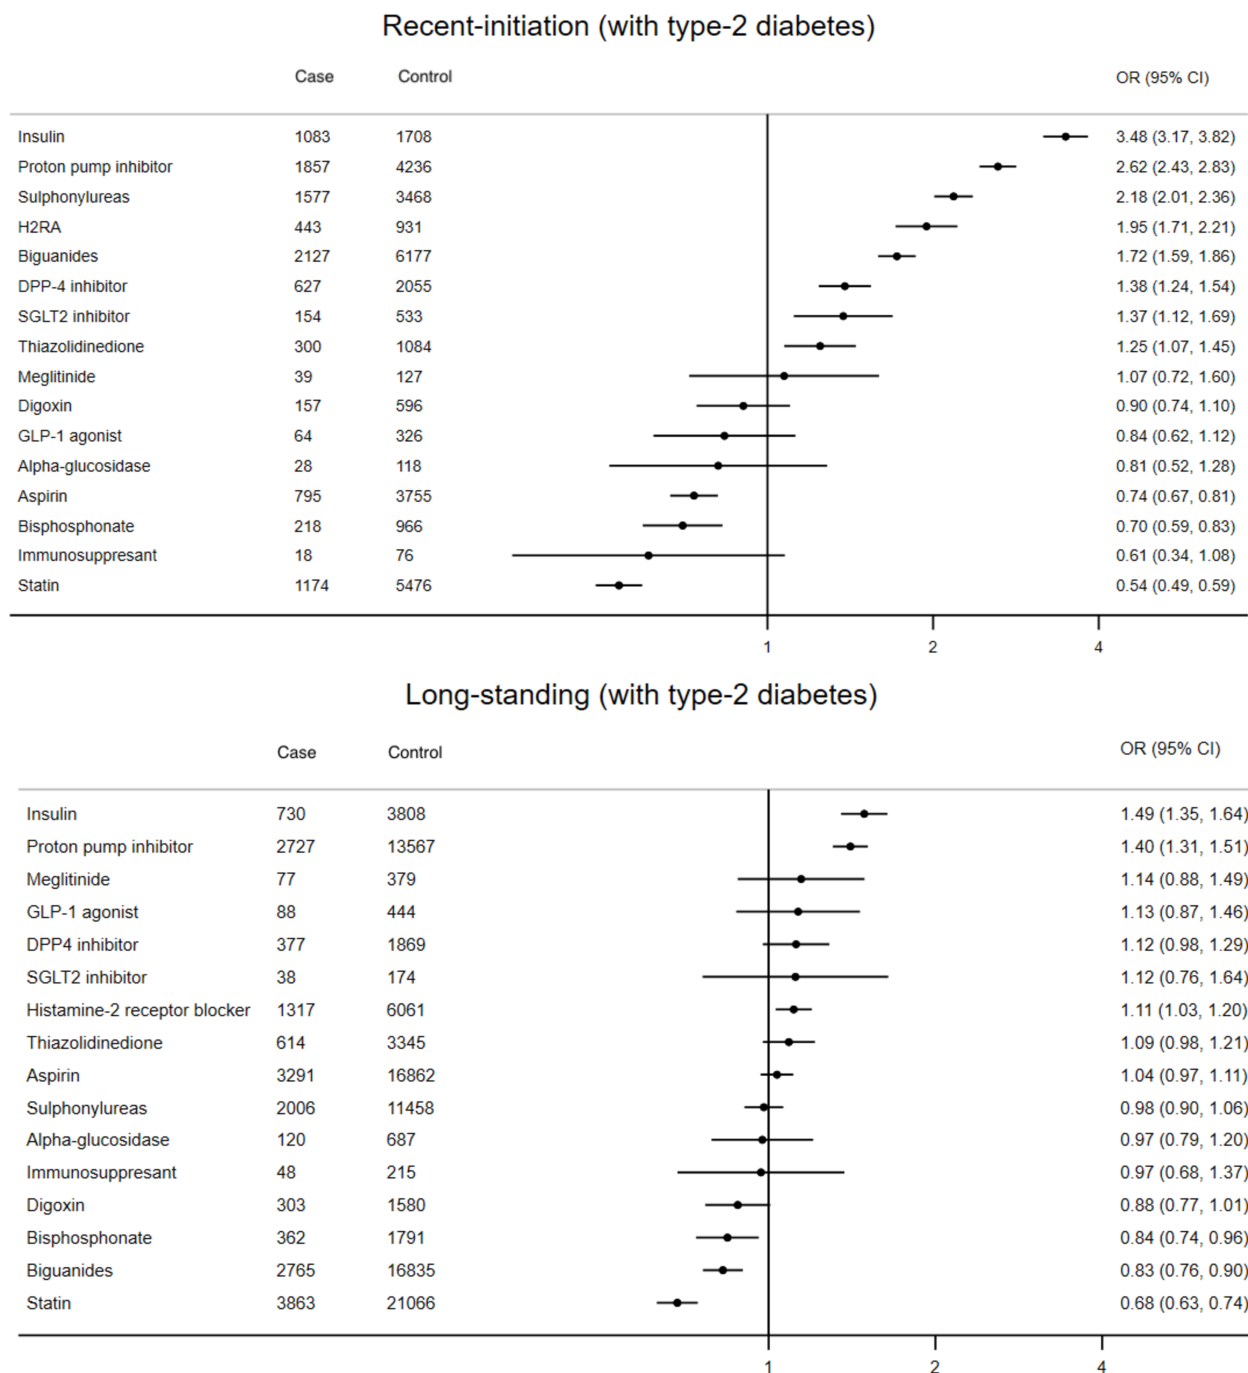

\* Subgrouping variables were not matching factors in the case-control study design, hence, these subgroup analysis were performed without matching but instead analysed using mixed effects logistic regression using practice as a random-effect variable and additionally adjusted for other matching factors (age, sex, year of diagnosis).

Figure S19 (b): Subgroup analysis by type-2 diabetes status - association of medications and risk of PDAC in individuals with no type-2 diabetes\*

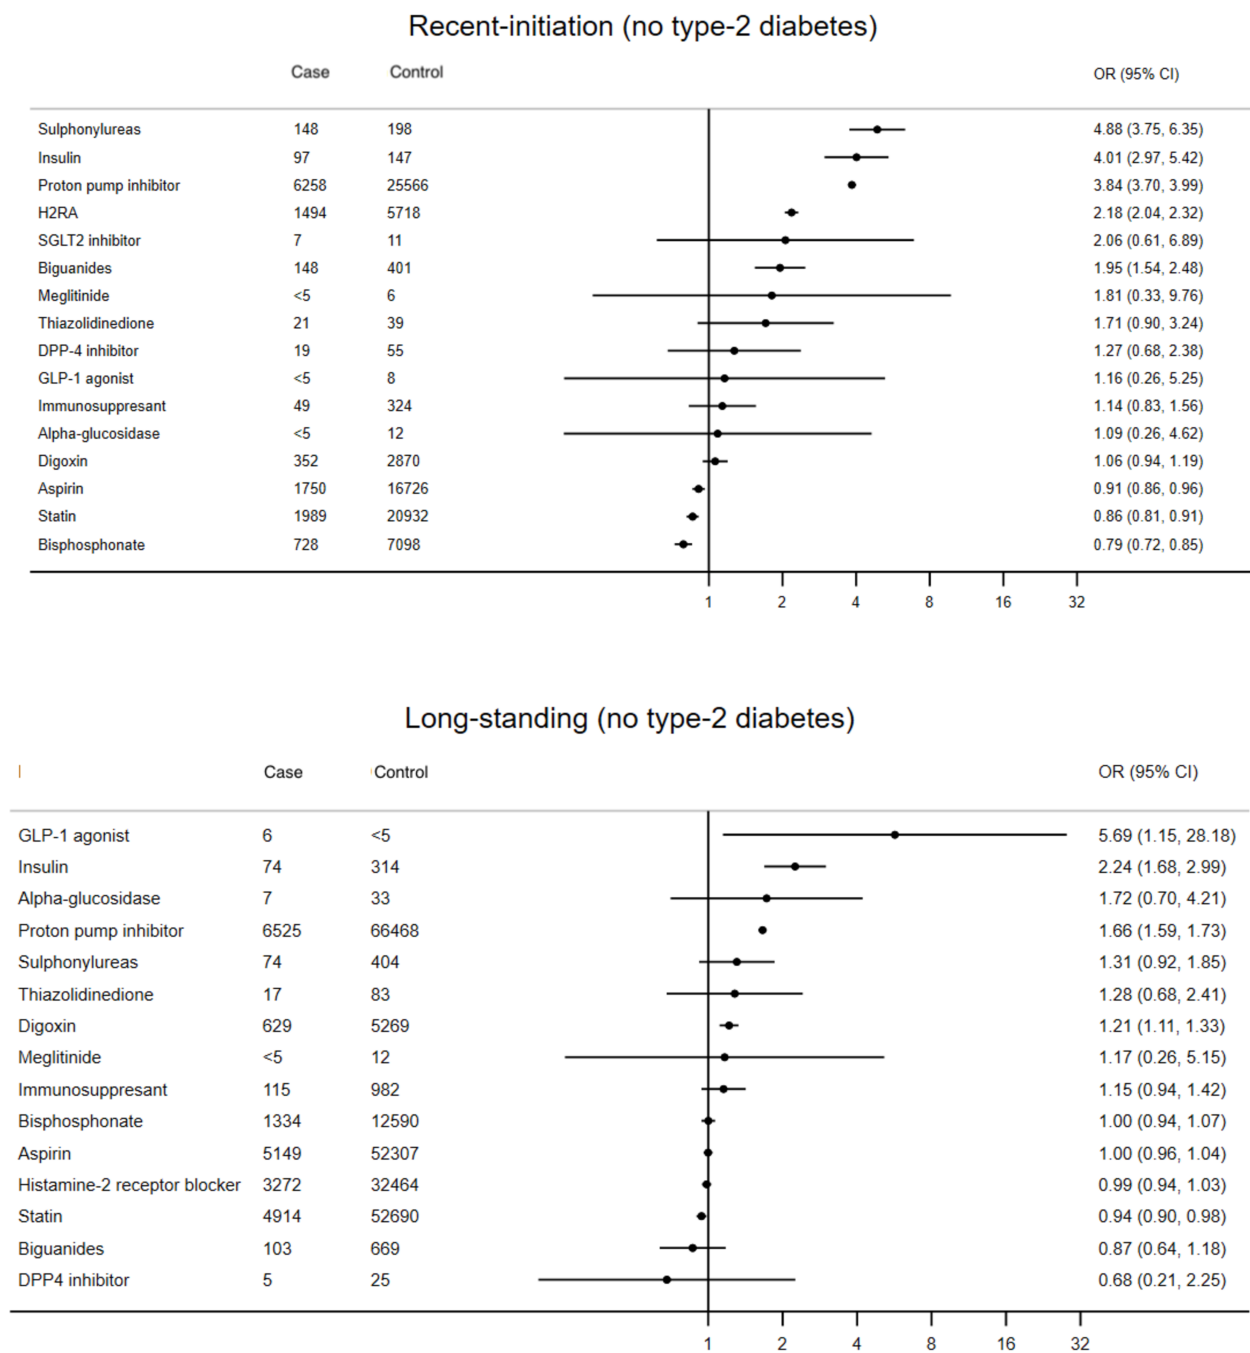

\* Subgrouping variables were not matching factors in the case-control study design, hence, these subgroup analysis were performed without matching but instead analysed using mixed effects logistic regression using practice as a random-effect variable and additionally adjusted for other matching factors (age, sex, year of diagnosis).
